# Supplementary material for: Transesterification of (hetero)aryl esters with phenols by an Earth-abundant metal catalyst
Source: Royal Society of Chemistry journal article supplement (doi:10.1039/c8ra04984j), 2018-01-01

## Supporting Information

# Transesterification of (hetero)aryl esters with phenols by an Earth-abundant metal catalyst

Jianxia Chen, E. Namila, Chaolumen Bai, Menghe Baiyin, Bao Agula, Yong-Sheng

Bao\*

*sbbys197812@163.com*

College of Chemistry and Environmental Science, Inner Mongolia Key  
Laboratory of Green catalysis, Inner Mongolia Normal University, Hohhot,  
010022, China.

### Table of Contents

|                                                                                                              |            |
|--------------------------------------------------------------------------------------------------------------|------------|
| <b>General information .....</b>                                                                             | <b>S2</b>  |
| <b>Part I. Reaction optimizations, trace metal analysis, and preliminary mechanistic investigation .....</b> | <b>S3</b>  |
| 1. Reaction optimization.....                                                                                | S3         |
| 2. Trace metal analysis by ICP-MS.....                                                                       | S4         |
| 3. GC-MS analysis of reaction of <b>1a</b> with <b>2a</b> and reaction of <b>4r</b> with <b>2a</b> .....     | S5         |
| 4. The solid state NMR spectra of used K <sub>2</sub> CO <sub>3</sub> .....                                  | S8         |
| <b>Part II. Experimental and analytics .....</b>                                                             | <b>S9</b>  |
| 1. General procedure for K <sub>2</sub> CO <sub>3</sub> -catalyzed transesterification .....                 | S9         |
| 2. Characterization data of products.....                                                                    | S9         |
| 3. 10 Gram-scale synthesis of <b>3aa</b> .....                                                               | S15        |
| <b>Part III. <sup>1</sup>H NMR and <sup>13</sup>C NMR Spectra of the Products .....</b>                      | <b>S16</b> |

## General information

Unless otherwise stated, reactions were performed in oven-dried reaction tube under air atmosphere. Reaction progress was monitored by thin-layer chromatography (TLC). Thin layer chromatography (TLC) was performed on pre-coated silica gel GF254 plates and visualized by UV fluorescence quenching. Silica gel (particle size 40–60 nm) was used for flash chromatography.  $^1\text{H}$  NMR spectras were recorded on a Bruker Avance 600 MHz in  $\text{CDCl}_3$  and are reported relative to residual solvent peak at  $\delta$  7.26 ppm.  $^{13}\text{C}$  NMR spectras were recorded on a Bruker Avance 600 MHz spectrometer (126 MHz) in  $\text{CDCl}_3$  and are reported relative to residual solvent peak at  $\delta$  77.16 ppm. Data for  $^1\text{H}$  NMR are reported as follows: chemical shift ( $\delta$  ppm) (multiplicity, coupling constant (Hz), integration). Multiplicities are reported as follows: s = singlet, d = doublet, t = triplet, m = multiplet. Data for  $^{13}\text{C}$  NMR are reported in terms of chemical shifts ( $\delta$  ppm). All chemical shifts are reported in ppm using TMS the internal standard. The structures of known compounds were further corroborated by comparing their  $^1\text{H}$  NMR data with those of literature. GC-MS analyses were obtained on a Thermo DSQ II gas chromatograph. ICP-MS analysis was conducted at the Agilent 7700ce ICP-MS spectrometer. The TEM images were recorded on a JEOL-2100F transmission electron microscope employing an accelerating voltage of 200 kV. The samples were suspended in ethanol and dried on holey carbon-coated Cu grids. The solid-state NMR experiments were performed on a Bruker Avance III 400 WB spectrometer equipped with a 9.39 T magnet at 297 K. The  $^1\text{H}$ - $^{13}\text{C}$  cross-polarization magic angle spinning (CP/MAS) NMR spectra were recorded using a Bruker 4 mm standard bore MAS probe head with the  $\text{ZrO}_2$  rotors spinning at 5.0 kHz rate with a Larmor frequency of 100.62 MHz. The spinning sidebands were suppressed by total sideband suppression (TOSS) technique. The TEM images were recorded on a JEOL-2100F transmission electron microscope employing an accelerating voltage of 200 kV. The samples were suspended in ethanol and dried on holey carbon-coated Cu grids.

$\text{K}_2\text{CO}_3$  was purchased from TCI (sublimed grade, 99.99% trace metals basis) and used directly. Phenol substrates were purchased from TCI and used as received (unless noted).

## Part I. Reaction optimizations, trace metal analysis, and preliminary mechanistic investigation

### 1. Reaction optimization

Procedure for reaction condition optimization: pyridin-2-yl 2-methylbenzoate **1a** and phenol **2a** were used as the model reaction. In a typical reaction, pyridin-2-yl 2-methylbenzoate (21.30 mg, 0.10 mmol), phenol (15.98 mg, 0.17 mmol), catalyst (1.38 mg, 0.01 mmol), and the solvent (2.0 mL) were charged in a 25 mL oven-dried reaction tube. Reaction was carried out 60 °C for 48 h in an oil bath under air condition. After being cooled to room temperature, the reaction solution was evaporated in vacuo. The residue was purified by flash column chromatography (silica gel, ethyl acetate/petroleum ether = 1:5~1:15 as an eluent) to afford the desired product **3**. All the products were also confirmed by comparing the <sup>1</sup>H NMR and <sup>13</sup>C NMR data with authentic samples.

**Table S1. Condition optimization of novel transesterification<sup>a</sup>**

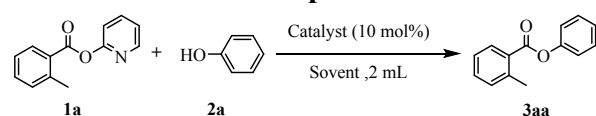

| Entry | Catalyst                                     | Base                           | T(°C) | Solvent     | yield(%) <sup>b</sup> |
|-------|----------------------------------------------|--------------------------------|-------|-------------|-----------------------|
| 1     | Pd/ $\gamma$ -Al <sub>2</sub> O <sub>3</sub> | K <sub>2</sub> CO <sub>3</sub> | 60    | 1,4-dioxane | 99                    |
| 2     | K <sub>2</sub> CO <sub>3</sub>               |                                | 60    | 1,4-dioxane | 100                   |
| 3     | K <sub>3</sub> PO <sub>4</sub>               |                                | 60    | 1,4-dioxane | 81                    |
| 4     | KOBu <sup>t</sup>                            |                                | 60    | 1,4-dioxane | 79                    |
| 5     | KOH                                          |                                | 60    | 1,4-dioxane | 70                    |
| 6     | KOCH <sub>3</sub>                            |                                | 60    | 1,4-dioxane | 92                    |
| 7     | Cs <sub>2</sub> CO <sub>3</sub>              |                                | 60    | 1,4-dioxane | 93                    |
| 8     | NaOH                                         |                                | 60    | 1,4-dioxane | NP                    |
| 9     | Na <sub>2</sub> CO <sub>3</sub>              |                                | 60    | 1,4-dioxane | NP                    |
| 10    | NaOC <sub>2</sub> H <sub>5</sub>             |                                | 60    | 1,4-dioxane | NP                    |
| 11    | NaOAc                                        |                                | 60    | 1,4-dioxane | NP                    |
| 12    | Li <sub>2</sub> CO <sub>3</sub>              |                                | 60    | 1,4-dioxane | NP                    |
| 13    | Ca(OH) <sub>2</sub>                          |                                | 60    | 1,4-dioxane | NP                    |
| 14    | NEt <sub>3</sub>                             |                                | 60    | 1,4-dioxane | NP                    |
| 15    | NaOH                                         |                                | 60    | DMSO        | 48                    |
| 16    | Li <sub>2</sub> CO <sub>3</sub>              |                                | 60    | DMSO        | 77                    |
| 17    | Ca(OH) <sub>2</sub>                          |                                | 60    | DMSO        | NP                    |
| 18    | NEt <sub>3</sub>                             |                                | 60    | DMSO        | NP                    |
| 19    | KI                                           |                                | 120   | DMSO        | 67                    |
| 20    | CsI                                          |                                | 120   | DMSO        | 55                    |
| 21    | NaI                                          |                                | 120   | DMSO        | 53                    |
| 22    | LiI                                          |                                | 120   | DMSO        | 56                    |
| 23    | —                                            |                                | 60    | 1,4-dioxane | NP                    |

|    |                                |    |                    |                 |
|----|--------------------------------|----|--------------------|-----------------|
| 24 | K <sub>2</sub> CO <sub>3</sub> | 60 | CH <sub>3</sub> CN | 76              |
| 25 | K <sub>2</sub> CO <sub>3</sub> | 60 | toluene            | 91              |
| 26 | K <sub>2</sub> CO <sub>3</sub> | 60 | PhCl               | 79              |
| 27 | K <sub>2</sub> CO <sub>3</sub> | 60 | DMF                | 93              |
| 28 | K <sub>2</sub> CO <sub>3</sub> | 60 | DMSO               | 94              |
| 29 | K <sub>2</sub> CO <sub>3</sub> | 60 | THF                | 91              |
| 30 | K <sub>2</sub> CO <sub>3</sub> | 60 | H <sub>2</sub> O   | 78              |
| 31 | K <sub>2</sub> CO <sub>3</sub> | 20 | 1,4-dioxane        | 31              |
| 32 | K <sub>2</sub> CO <sub>3</sub> | 40 | 1,4-dioxane        | 42              |
| 33 | K <sub>2</sub> CO <sub>3</sub> | 80 | 1,4-dioxane        | 92              |
| 34 | K <sub>2</sub> CO <sub>3</sub> | 60 | 1,4-dioxane        | 97 <sup>d</sup> |

<sup>a</sup> Reaction conditions: **1a** (0.1 mmol), **2a** (0.17 mmol), catalyst (10 mol%), solvent (2 mL), 60 °C, 48 h; <sup>b</sup> Isolated yield; <sup>c</sup> Catalyst (100 mol%); <sup>d</sup> **1a** (0.1 mmol), **2a** (0.1 mmol).

The results from Table S1 reveal that there is a high degree of tunability in the reaction conditions for the novel transesterification reaction. All potassium bases, such as KOH, K<sub>3</sub>PO<sub>4</sub>, KOCH<sub>3</sub>, KOBu<sup>t</sup> and Cs<sub>2</sub>CO<sub>3</sub> could catalyze the transesterification reaction smoothly (entries 3-7). But reactions in the presence of other bases as potential catalysts, such as NaOH, Na<sub>2</sub>CO<sub>3</sub>, NaOC<sub>2</sub>H<sub>5</sub>, NaOAc, Li<sub>2</sub>CO<sub>3</sub>, Ca(OH)<sub>2</sub>, and strongly basic amines TEA, did not proceed (entries 8-14). Aim to confirm if this transformation is solubility controlled, NaOH, Li<sub>2</sub>CO<sub>3</sub>, Ca(OH)<sub>2</sub> and TEA were chosen for reacting in DMSO (entries 15-18). The experiment results showed that NaOH, and Li<sub>2</sub>CO<sub>3</sub> could catalyze the transesterification reaction to give desired product in DMSO, whereas Ca(OH)<sub>2</sub> and TEA could not. Non-basic alkali metal salts, including KI, CsI, NaI and LiI, could catalyze the transesterification reaction smoothly at 120 °C (entries 19-22). The use of other solvents, such as DMF, DMSO, CH<sub>3</sub>CN, PhCl, toluene and H<sub>2</sub>O, led to the formation of **3aa** in lower yields (entries 24-30). Both a decrease and increase in the reaction temperature (20 °C, 40 °C and 80 °C) reduced the yield of **3aa** (entries 31-33). When the reactants in a ratio 1:1, the yield of **3aa** represents a slight decline (entry 34).

## 2. Trace metal analysis by ICP-MS

*ICP-MS trace metal analysis.* To provide further support against involvement of adventitious trace metal species in the K<sub>2</sub>CO<sub>3</sub>-catalyzed transesterification of aryl ester with phenol, inductively coupled plasma mass spectrometry (ICP-MS) was performed on samples of K<sub>2</sub>CO<sub>3</sub> and a standard reaction mixture that was run under optimized conditions in the glove box. Each sample was added to a 100 mL DigiTUBE digestion tube (SCP Science) followed by addition of 3.0 mL of Plasma Pure chloroazotic acid (SCP Science) and heating to 75°C for 36 hours. After digestion, each sample was diluted using Milli Q water to 100 mL and sample analysis was performed on an Agilent 7700ce ICP-MS spectrometer. The results are given in Table S2. The results

from quantitative analysis revealed that most metal contaminants were present below the instrument's lowest limit of detection (i.e., in 0.1 ppm range or lower). On the other hand, the model reaction was conducted in new glassware, and almost the same result (100% isolated yield) was obtained. These results indicated that this hydroxylation reaction is promoted by  $K_2CO_3$  itself rather than catalyzed by the presence of trace metal impurities.

**Table S2:** ICP-MS analysis on the contents (ppm) of elements in  $K_2CO_3$  and model reaction solution.

| Transition-metal        | Pd   | Cu   | Fe   | Ru   | Ir   | Ni   | Ag   | Au   |
|-------------------------|------|------|------|------|------|------|------|------|
| $K_2CO_3$               | <0.1 | <0.1 | <0.1 | <0.1 | <0.1 | 0.13 | <0.1 | <0.1 |
| Model reaction solution | <0.1 | <0.1 | <0.1 | <0.1 | <0.1 | <0.1 | <0.1 | <0.1 |

### 3. GC-MS analysis of reaction of 1a with 2a and reaction of 4r with 2a

#### GC-MS analysis of reaction of 1a with 2a

RT: 4.50 - 16.00

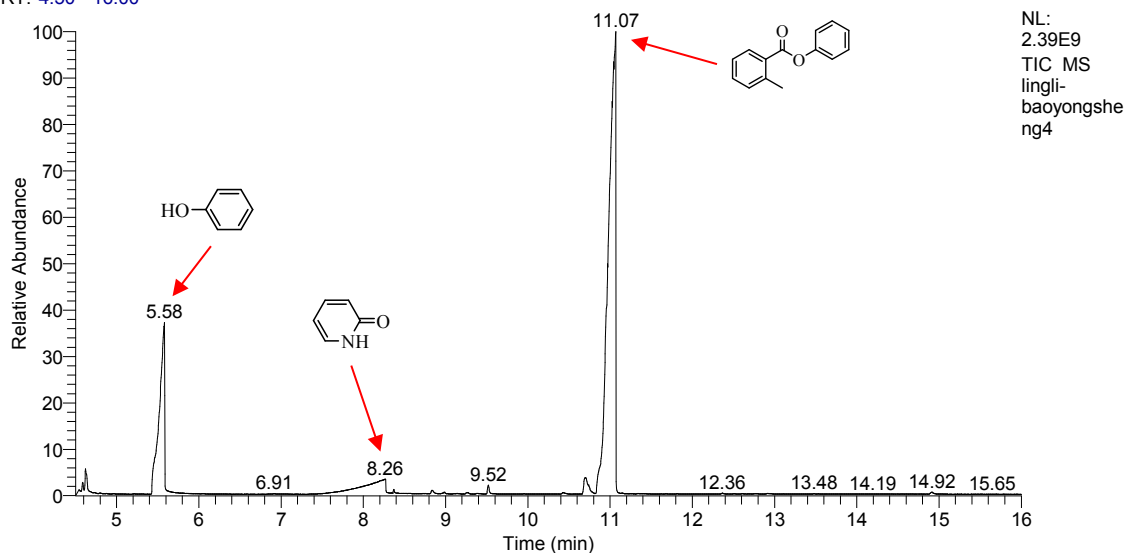

lingli-baoyongsheng4 #1679 RT: 5.57 AV: 1 AV: 5 SB: 12 1672-1677 1681-1686 NL: 1.80E8  
F: + c Full ms [1.00-650.00]

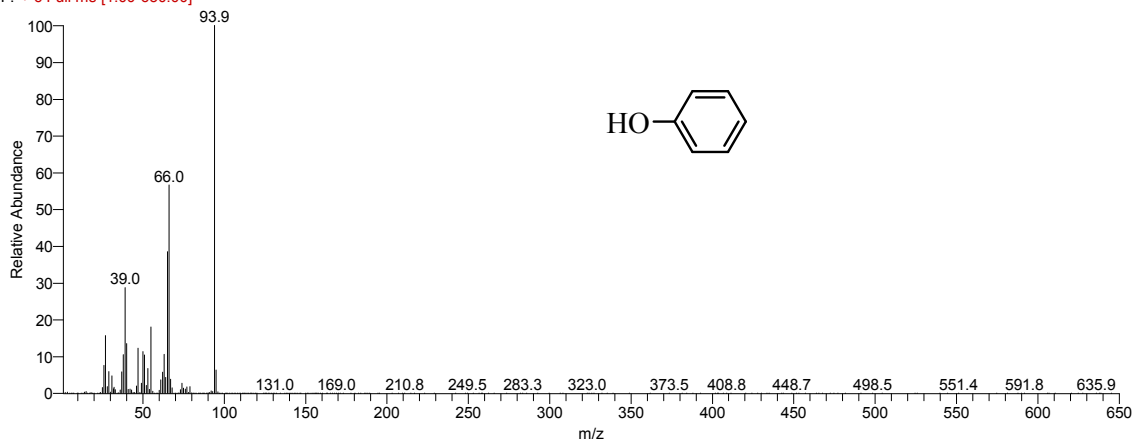

lingli-baoyongsheng4 #2500 RT: 8.25 AV: 1 AV: 5 SB: 12 2493-2498 2502-2507 NL: 1.39E7  
F: + c Full ms [1.00-650.00]

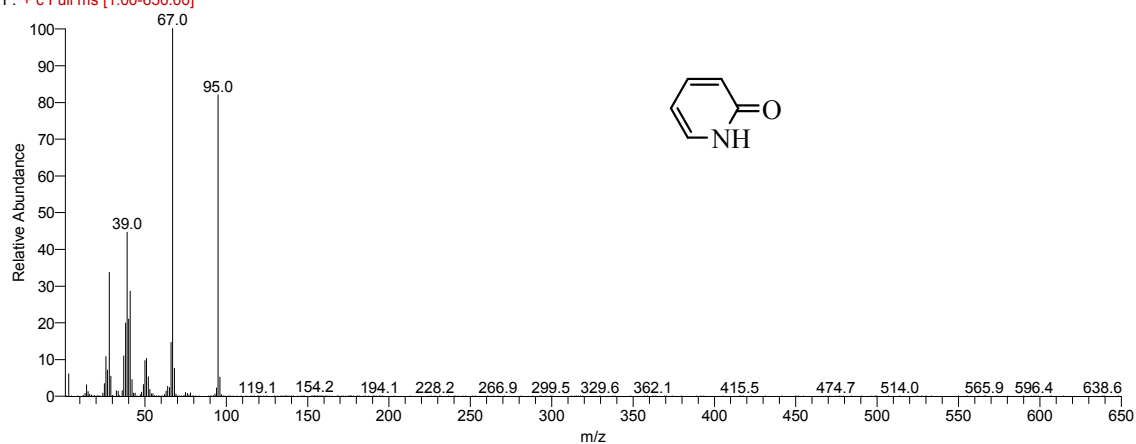

lingli-baoyongsheng4 #3357 RT: 11.05 AV: 1 AV: 5 SB: 12 3350-3355 3359-3364 NL: 1.14E9  
F: + c Full ms [1.00-650.00]

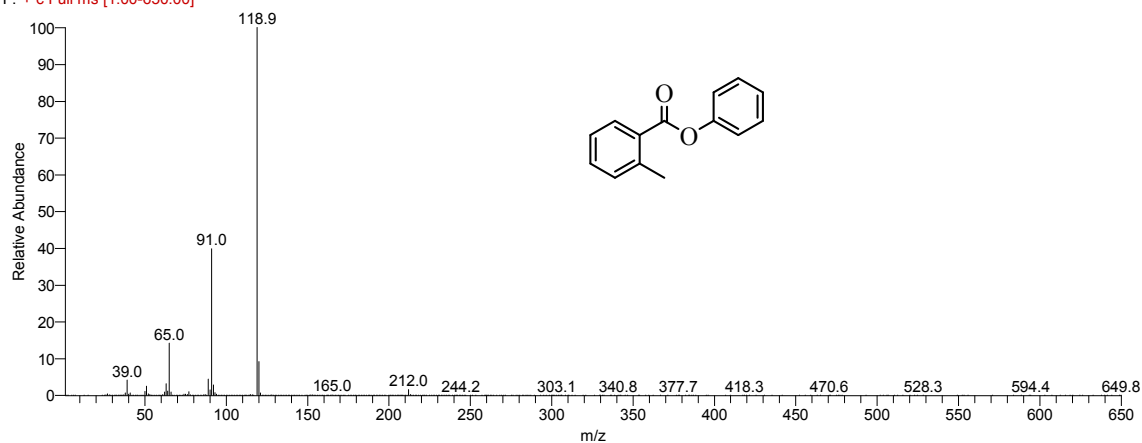

### GC-MS analysis of reaction of 4r with 2a

RT: 4.50 - 16.00

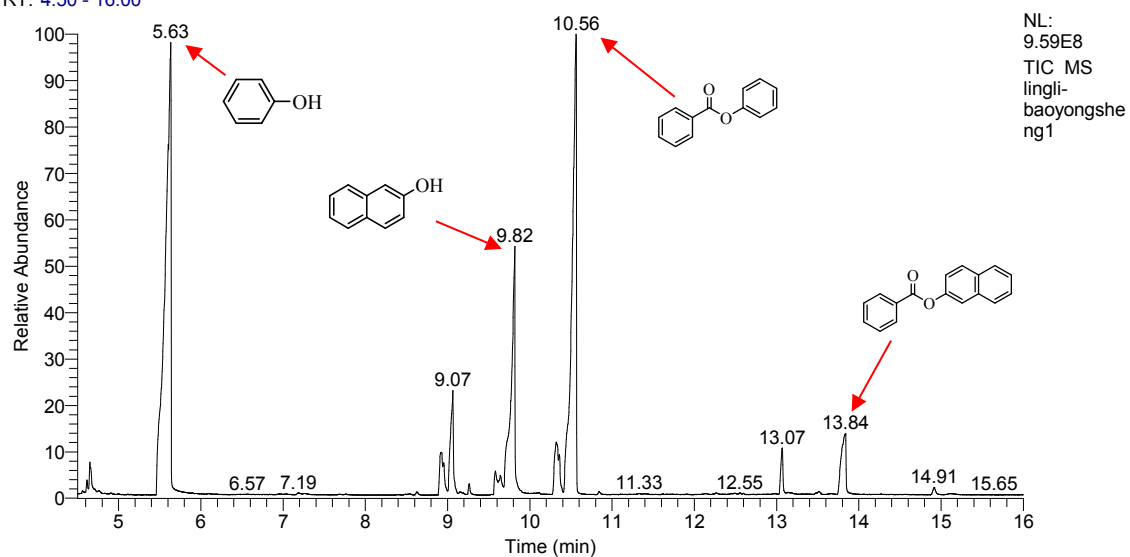

lingli-baoyongsheng1 #1695 RT: 5.62 AV: 1 AV: 5 SB: 12 1688-1693 1697-1702 NL: 2.14E8  
F: + c Full ms [1.00-650.00]

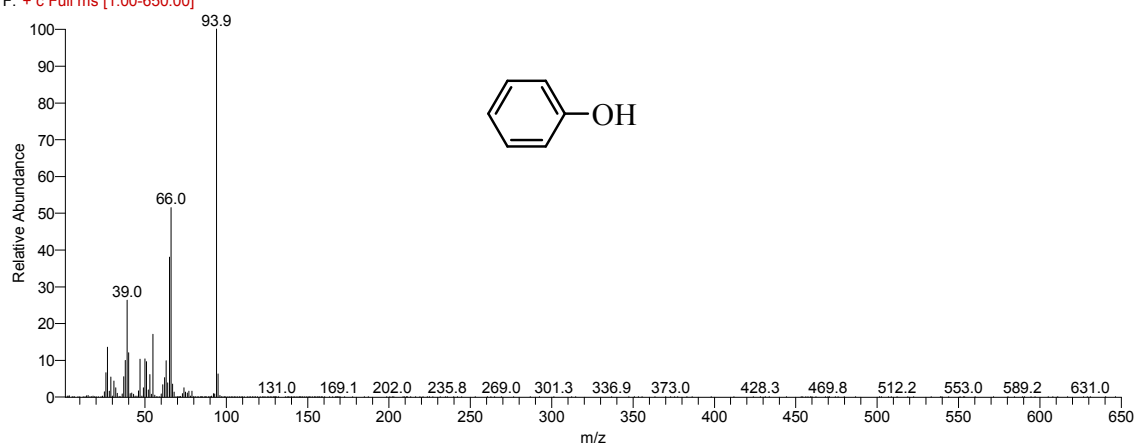

lingli-baoyongsheng1 #2976 RT: 9.81 AV: 1 AV: 5 SB: 12 2969-2974 2978-2983 NL: 1.01E8  
F: + c Full ms [1.00-650.00]

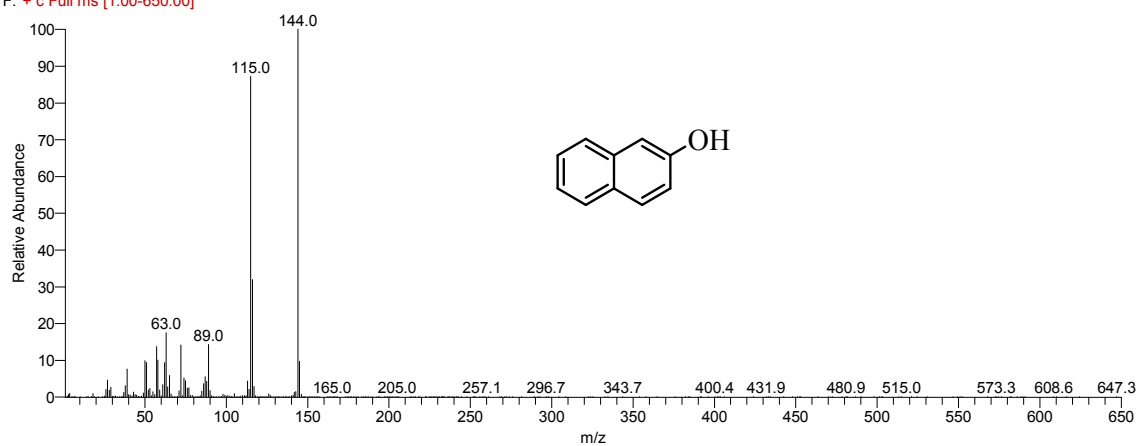

lingli-baoyongsheng1 #3204 RT: 10.55 AV: 1 AV: 5 SB: 12 3197-3202 3206-3211 NL: 3.59E8  
F: + c Full ms [1.00-650.00]

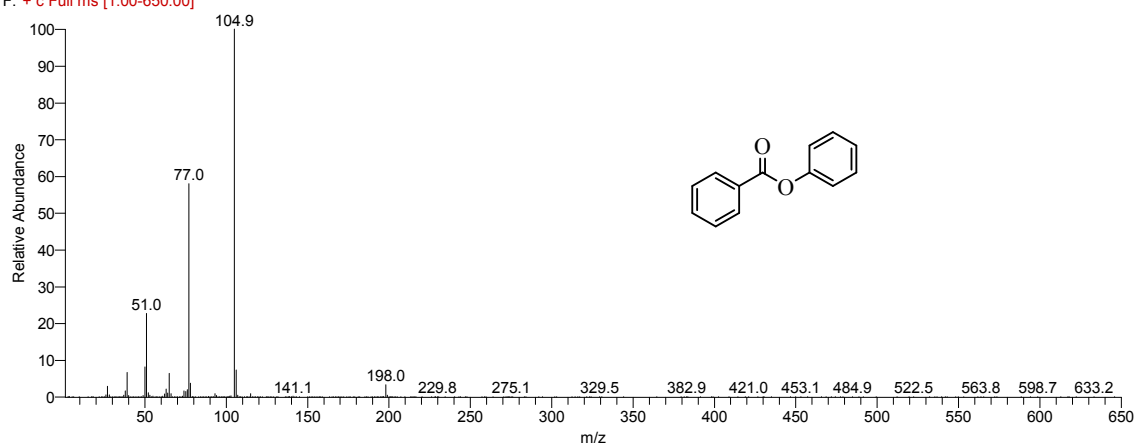

lingli-baoyongsheng1 #4206 RT: 13.83 AV: 1 AV: 5 SB: 12 4199-4204 4208-4213 NL: 3.98E7  
F: + c Full ms [1.00-650.00]

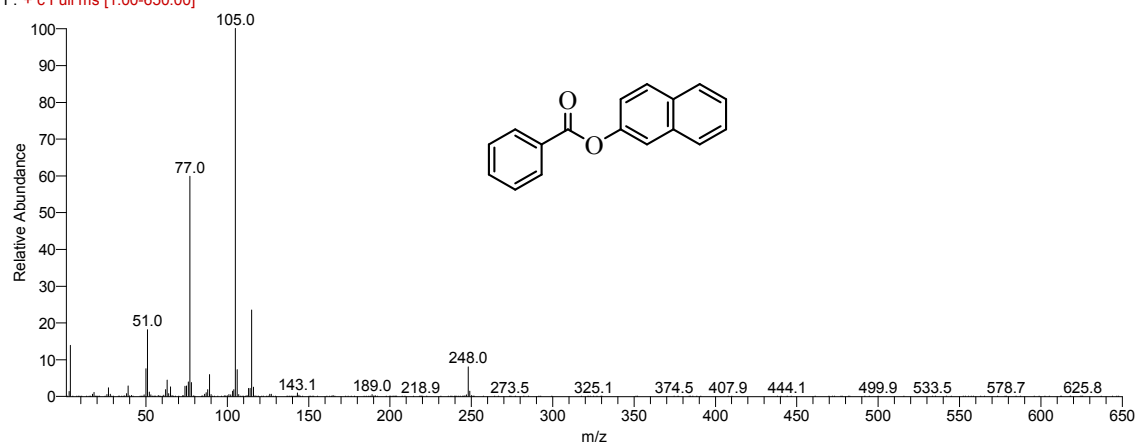

#### 4. The solid state NMR spectra of used $K_2CO_3$

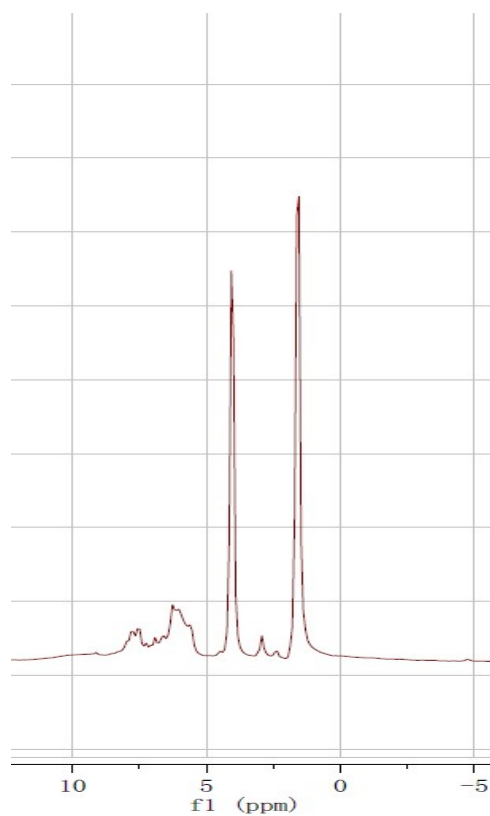

Figure S1. The solid state  $^1H$  NMR of used  $K_2CO_3$  catalyst



## Part II. Experimental and analytics

### 1. General procedure for K<sub>2</sub>CO<sub>3</sub>-catalyzed transesterification

In a typical reaction, Aryl ester (0.10 mmol), phenol (0.17 mmol), catalyst (0.01 mmol or 0.02 mmol), and the solvent 1,4-dioxane (2.0 mL) were charged in a 25 mL oven-dried reaction tube. Reaction was carried out 60 °C or 120 °C for 48 h in an oil bath under air condition. After being cooled to room temperature, the reaction solution was evaporated in vacuo. The residue was purified by flash column chromatography (silica gel, ethyl acetate/petroleum ether = 1:5~1:15 as an eluent) to afford the desired product **3**. All the products were also confirmed by comparing the <sup>1</sup>H NMR and <sup>13</sup>C NMR data with authentic samples.

### 2. Characterization Data for the Products

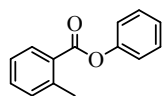

phenyl 2-methylbenzoate **3aa**.<sup>1</sup> Yield: 100% (21.2 mg). <sup>1</sup>H NMR (600 MHz, CDCl<sub>3</sub>) δ 8.16 (d, *J* = 7.7 Hz, 1H), 7.47 (t, *J* = 7.4 Hz, 1H), 7.43 (t, *J* = 7.6 Hz, 2H), 7.36 – 7.29 (m, 2H), 7.26 (t, *J* = 7.4 Hz, 1H), 7.21 (d, *J* = 7.8 Hz, 2H), 2.67 (s, 3H); <sup>13</sup>C NMR (151 MHz, CDCl<sub>3</sub>) δ 165.9, 151.0, 141.4, 132.8, 132.0, 131.2, 129.5, 128.6, 126.0, 125.9, 121.9, 22.0.

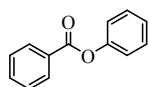

phenyl benzoate **3ba**.<sup>2</sup> Yield: 78% (15.4 mg). <sup>1</sup>H NMR (600 MHz, CDCl<sub>3</sub>) δ 8.21 (d, *J* = 7.4 Hz, 2H), 7.62 (t, *J* = 7.3 Hz, 1H), 7.50 (t, *J* = 7.6 Hz, 2H), 7.42 (t, *J* = 7.7 Hz, 2H), 7.27 (t, *J* = 7.3 Hz, 1H), 7.22 (d, *J* = 7.8 Hz, 2H); <sup>13</sup>C NMR (151 MHz, CDCl<sub>3</sub>) δ 165.2, 151.0, 133.6, 130.2, 129.6, 129.5, 128.6, 125.9, 121.8.

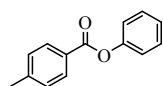

phenyl 4-methylbenzoate **3ca**.<sup>3</sup> Yield: 79% (16.8 mg). <sup>1</sup>H NMR (600 MHz, CDCl<sub>3</sub>) δ 8.09 (d, *J* = 8.2 Hz, 2H), 7.46 – 7.40 (m, 2H), 7.30 (d, *J* = 8.0 Hz, 2H), 7.28 – 7.24 (m, 1H), 7.23 – 7.18 (m, 2H), 2.45 (s, 3H); <sup>13</sup>C NMR (151 MHz, CDCl<sub>3</sub>) δ 165.3, 151.1, 144.4, 130.2, 129.5, 129.3, 126.9, 125.8, 121.8, 21.8.

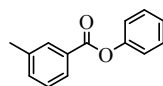

phenyl 3-methylbenzoate **3da**.<sup>3</sup> Yield: 85% (18.0 mg). <sup>1</sup>H NMR (600 MHz, CDCl<sub>3</sub>) δ 8.16 (dd, *J* = 7.7, 1.0 Hz, 1H), 7.47 (td, *J* = 7.5, 1.4 Hz, 1H), 7.45 – 7.40 (m, 2H), 7.35 – 7.29 (m, 2H), 7.29 – 7.25 (m, 1H), 7.23 – 7.18 (m, 2H), 2.68 (s, 3H); <sup>13</sup>C NMR (151 MHz, CDCl<sub>3</sub>) δ 165.9, 151.0, 141.4, 132.7, 132.0, 131.2, 129.5, 128.6, 126.0, 125.9, 121.9, 22.0.

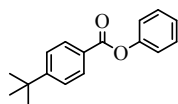

phenyl 4-(tert-butyl)benzoate **3ea**.<sup>3</sup> Yield: 61% (15.5 mg). <sup>1</sup>H NMR (600 MHz, CDCl<sub>3</sub>) δ 8.17 – 8.07 (m, 2H), 7.56 – 7.50 (m, 2H), 7.45 – 7.38 (m, 2H), 7.28 – 7.25 (m, 1H), 7.23 – 7.18 (m, 2H), 1.37 (s, 9H); <sup>13</sup>C NMR (151 MHz, CDCl<sub>3</sub>) δ 165.2, 157.4, 151.1, 130.1, 129.5, 126.8, 125.8, 125.6, 121.8, 35.2, 31.1.

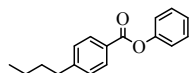

phenyl 4-butylbenzoate **3fa**.<sup>4</sup> Yield: 70% (17.8 mg). <sup>1</sup>H NMR (600 MHz, CDCl<sub>3</sub>) δ 8.25 – 8.01 (m, 2H), 7.46 – 7.38 (m, 2H), 7.31 (d, *J* = 8.2 Hz, 2H), 7.27 – 7.24 (m, 1H), 7.23 – 7.19 (m, 2H), 2.70 (t, *J* = 7.2 Hz, 2H), 1.69 – 1.60 (m, 2H), 1.43 – 1.33 (m, 2H), 0.94 (t, *J* = 7.4 Hz, 3H); <sup>13</sup>C NMR (151 MHz, CDCl<sub>3</sub>) δ 165.3, 151.1, 149.4, 130.3, 129.5, 128.7, 127.0, 125.8, 121.8, 35.8, 33.3, 22.3, 13.9.

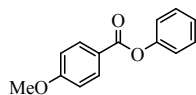

phenyl 4-methoxybenzoate **3ga**.<sup>3</sup> Yield: 79% (17.9 mg). <sup>1</sup>H NMR (600 MHz, CDCl<sub>3</sub>) δ 8.21 – 8.13 (m, 2H), 7.43 (t, *J* = 7.9 Hz, 2H), 7.27 (t, *J* = 5.6 Hz, 1H), 7.21 (d, *J* = 7.6 Hz, 2H), 6.99 (d, *J* = 8.9 Hz, 2H), 3.90 (s, 3H); <sup>13</sup>C NMR (151 MHz, CDCl<sub>3</sub>) δ 164.9, 163.9, 151.1, 132.3, 129.5, 125.7, 121.9, 121.8, 113.9, 55.5.

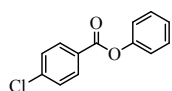

phenyl 4-chlorobenzoate **3ha**.<sup>3</sup> Yield: 70% (16.3 mg). <sup>1</sup>H NMR (600 MHz, CDCl<sub>3</sub>) δ 8.14 (d, *J* = 8.2 Hz, 2H), 7.48 (d, *J* = 8.2 Hz, 2H), 7.43 (t, *J* = 7.7 Hz, 2H), 7.28 (t, *J* = 7.4 Hz, 1H), 7.21 (d, *J* = 7.9 Hz, 2H); <sup>13</sup>C NMR (151 MHz, CDCl<sub>3</sub>) δ 164.4, 150.8, 140.2, 131.6, 129.6, 129.0, 128.1, 126.1, 121.6.

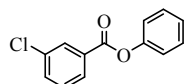

phenyl 3-chlorobenzoate **3ia**.<sup>5</sup> Yield: 74% (17.2 mg). <sup>1</sup>H NMR (600 MHz, CDCl<sub>3</sub>) δ 8.19 (s, 1H), 8.09 (d, *J* = 7.5 Hz, 1H), 7.61 (d, *J* = 7.9 Hz, 1H), 7.50 – 7.40 (m, 3H), 7.29 (t, *J* = 7.3 Hz, 1H), 7.21 (d, *J* = 7.6 Hz, 2H); <sup>13</sup>C NMR (151 MHz, CDCl<sub>3</sub>) δ 164.0, 150.7, 134.8, 133.6, 131.4, 130.2, 129.9, 129.6, 128.3, 126.1, 121.6.

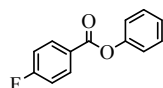

phenyl 4-fluorobenzoate **3ja**.<sup>3</sup> Yield: 85% (18.4 mg). <sup>1</sup>H NMR (600 MHz, CDCl<sub>3</sub>) δ 8.27 – 8.19 (m, 2H), 7.47 – 7.38 (m, 2H), 7.31 – 7.26 (m, 1H), 7.24 – 7.15 (m, 4H); <sup>13</sup>C NMR (151 MHz, CDCl<sub>3</sub>) δ 167.0, 165.3, 164.2, 150.9, 132.8 (d, *J* = 9.3 Hz), 129.5, 126.0, 125.8 (d, *J* = 3.0 Hz), 121.7, 115.8 (d, *J* = 22.1 Hz).

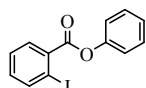

phenyl 2-iodobenzoate **3ka**.<sup>2</sup> Yield: 68% (22.0 mg). <sup>1</sup>H NMR (600 MHz, CDCl<sub>3</sub>) δ 8.07 (dd, *J* = 8.0, 1.0 Hz, 1H), 8.04 (dd, *J* = 7.8, 1.7 Hz, 1H), 7.48 (td, *J* = 7.6, 1.1 Hz, 1H), 7.46 – 7.41 (m, 2H), 7.30 – 7.25 (m, 3H), 7.22 (td, *J* = 7.7, 1.7 Hz, 1H); <sup>13</sup>C NMR (151 MHz, CDCl<sub>3</sub>) δ 164.9, 150.7, 141.7, 134.3, 133.2, 131.5, 129.6, 128.1, 126.2, 121.6, 94.6.

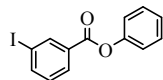

phenyl 3-iodobenzoate **3la**.<sup>6</sup> Yield: 89% (28.8 mg). <sup>1</sup>H NMR (600 MHz, CDCl<sub>3</sub>) δ 8.54 (t, *J* = 1.6 Hz, 1H), 8.22 – 8.13 (m, 1H), 8.00 – 7.94 (m, 1H), 7.49 – 7.40 (m, 2H), 7.33 – 7.25 (m, 2H), 7.23 – 7.17 (m, 2H); <sup>13</sup>C NMR (151 MHz, CDCl<sub>3</sub>) δ 163.7, 150.7, 142.4, 139.0, 131.5, 130.3, 129.6, 129.3, 126.1, 121.6, 93.9.

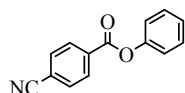

phenyl 4-cyanobenzoate **3ma**.<sup>7</sup> Yield: 28% (6.3 mg). <sup>1</sup>H NMR (600 MHz, CDCl<sub>3</sub>) δ 8.31 (d, *J* = 8.2 Hz, 2H), 7.81 (d, *J* = 8.3 Hz, 2H), 7.45 (t, *J* = 7.8 Hz, 2H), 7.31 (t, *J* = 7.4 Hz, 1H), 7.22 (d, *J* = 8.3 Hz, 2H); <sup>13</sup>C NMR (151 MHz, CDCl<sub>3</sub>) δ 163.6, 150.6, 133.4, 132.4, 130.7, 129.7, 126.4, 121.5, 117.9, 117.0.

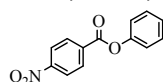

phenyl 4-nitrobenzoate **3na**.<sup>1</sup> Yield: 95% (23.1 mg). <sup>1</sup>H NMR (600 MHz, CDCl<sub>3</sub>) δ 8.44 – 8.29 (m, 4H), 7.50 – 7.42 (m, 2H), 7.31 (t, *J* = 7.5 Hz, 1H), 7.25 – 7.22 (m, 2H); <sup>13</sup>C NMR (151 MHz, CDCl<sub>3</sub>) δ 163.4, 150.5, 135.0, 131.3, 129.7, 126.5, 123.8, 121.4, 120.7.

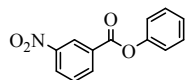

phenyl 3-nitrobenzoate **3oa**.<sup>1</sup> Yield: 29% (7.1mg). <sup>1</sup>H NMR (600 MHz, CDCl<sub>3</sub>) δ 9.05 (t, *J* = 1.9 Hz, 1H), 8.56 – 8.52 (m, 1H), 8.50 (ddd, *J* = 8.2, 2.3, 1.1 Hz, 1H), 7.74 (t, *J* = 8.0 Hz, 1H), 7.51 – 7.44 (m, 2H), 7.35 – 7.29 (m, 1H), 7.27 – 7.24 (m, 2H); <sup>13</sup>C NMR (151 MHz, CDCl<sub>3</sub>) δ 163.1, 150.5, 148.4, 135.8, 131.4, 129.9, 129.7, 128.0, 126.4, 125.1, 121.5.

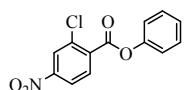

phenyl 2-chloro-4-nitrobenzoate **3pa**.<sup>8</sup> Yield: 69% (19.1 mg). <sup>1</sup>H NMR (600 MHz, CDCl<sub>3</sub>) δ 8.40 (d, *J* = 2.2 Hz, 1H), 8.26 – 8.22 (m, 1H), 8.18 (d, *J* = 8.5 Hz, 1H), 7.50 – 7.43 (m, 2H), 7.36 – 7.30 (m, 1H), 7.28 – 7.26 (m, 2H); <sup>13</sup>C NMR (151 MHz, CDCl<sub>3</sub>) δ 162.7, 150.3, 149.8, 135.5, 135.2, 132.5, 129.7, 126.6, 126.3, 121.6, 121.3.

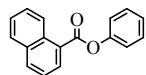

phenyl 1-naphthoate **3qa**.<sup>9</sup> Yield: 89% (22.1 mg). <sup>1</sup>H NMR (600 MHz, CDCl<sub>3</sub>) δ 9.04 (d, *J* = 8.6 Hz, 1H), 8.46 (d, *J* = 7.2 Hz, 1H), 8.07 (d, *J* = 8.1 Hz, 1H), 7.89 (d, *J* = 8.1 Hz, 1H), 7.62 (t, *J* = 7.7 Hz, 1H), 7.54 (t, *J* = 7.6 Hz, 2H), 7.45 (t, *J* = 7.5 Hz, 2H), 7.32 – 7.25 (m, 3H); <sup>13</sup>C NMR (151 MHz, CDCl<sub>3</sub>) δ 165.9, 151.1, 134.4, 134.0, 131.8, 131.3, 129.6, 128.8, 128.2, 126.5, 126.0, 125.9, 125.8, 124.6, 122.0.

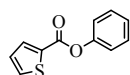

phenyl thiophene-2-carboxylate **3ra**.<sup>10</sup> Yield: 82% (16.7 mg). <sup>1</sup>H NMR (600 MHz, CDCl<sub>3</sub>) δ 7.98 (dd, *J* = 3.7, 1.2 Hz, 1H), 7.66 (dd, *J* = 5.0, 1.2 Hz, 1H), 7.45 – 7.39 (m, 2H), 7.31 – 7.25 (m, 1H), 7.24 – 7.20 (m, 2H), 7.18 (dd, *J* = 5.0, 3.8 Hz, 1H); <sup>13</sup>C NMR (151 MHz, CDCl<sub>3</sub>) δ 160.6, 150.6, 134.7, 133.5, 132.9, 129.5, 128.0, 126.0, 121.7.

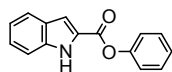

phenyl 1*H*-indole-2-carboxylate **3sa**.<sup>7</sup> Yield: 89% (21.1 mg). <sup>1</sup>H NMR (600 MHz, CDCl<sub>3</sub>) δ 9.25 (s, 1H), 7.73 (d, *J* = 8.0 Hz, 1H), 7.49 – 7.40 (m, 3H), 7.40 – 7.32 (m, 2H), 7.29 (t, *J* = 7.5 Hz, 1H), 7.27 – 7.22 (m, 2H), 7.21 – 7.15 (m, 1H); <sup>13</sup>C NMR (151 MHz, CDCl<sub>3</sub>) δ 160.7, 150.5, 137.4, 129.6, 127.5, 126.4, 126.1, 125.9, 122.8, 121.7, 121.1, 112.1, 110.3.

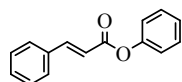

phenyl cinnamate **3ta**.<sup>11</sup> Yield: 36% (8.1 mg). <sup>1</sup>H NMR (600 MHz, CDCl<sub>3</sub>) δ 7.87 (d, *J* = 16.0 Hz, 1H), 7.57 (s, 2H), 7.47 – 7.35 (m, 5H), 7.24 (t, *J* = 7.2 Hz, 1H), 7.17 (d, *J* = 7.8 Hz, 2H), 6.63 (d, *J* = 16.0 Hz, 1H); <sup>13</sup>C NMR (151 MHz, CDCl<sub>3</sub>) δ 165.4, 150.9, 146.6, 134.2, 130.7, 129.5, 129.0, 128.3, 125.8, 121.7, 117.4.

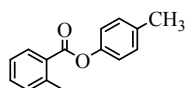

4-methylphenyl 2-methylbenzoate **3ab**.<sup>12</sup> Yield: 100% (22.6 mg). <sup>1</sup>H NMR (600 MHz, CDCl<sub>3</sub>) δ 8.14 (dd, *J* = 7.7, 1.2 Hz, 1H), 7.46 (td, *J* = 7.5, 1.4 Hz, 1H), 7.35 – 7.27 (m, 2H), 7.25 – 7.17 (m, 2H), 7.13 – 7.00 (m, 2H), 2.67 (s, 3H), 2.36 (s, 3H); <sup>13</sup>C NMR (151 MHz, CDCl<sub>3</sub>) δ 166.1, 148.7, 141.3, 135.5, 132.7, 131.9, 131.2, 130.0, 128.8, 125.9, 121.5, 22.0, 20.9.

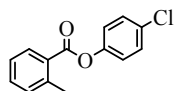

4-chlorophenyl 2-methylbenzoate **3ac**.<sup>13</sup> Yield: 100% (24.6 mg). <sup>1</sup>H NMR (600 MHz, CDCl<sub>3</sub>) δ 8.14 (d, *J* = 7.8 Hz, 1H), 7.48 (td, *J* = 7.5, 1.4 Hz, 1H), 7.43 – 7.35 (m, 2H), 7.32 (t, *J* = 7.7 Hz, 2H), 7.20 – 7.09 (m, 2H), 2.66 (s, 3H); <sup>13</sup>C NMR (151 MHz, CDCl<sub>3</sub>) δ 165.5, 149.4, 141.5, 133.0, 132.1, 131.2, 129.6, 128.1, 126.0, 123.3, 22.0.

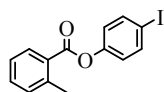

4-iodophenyl 2-methylbenzoate **3ad**.<sup>14</sup> Yield: 79% (26.7 mg). <sup>1</sup>H NMR (600 MHz, CDCl<sub>3</sub>) δ 8.13 (d, *J* = 7.6 Hz, 1H), 7.76 – 7.71 (m, 2H), 7.48 (td, *J* = 7.6, 1.3 Hz, 1H), 7.32 (t, *J* = 7.6 Hz, 2H), 7.01 – 6.95 (m, 2H), 2.66 (s, 3H); <sup>13</sup>C NMR (151 MHz, CDCl<sub>3</sub>) δ 165.4, 150.8, 141.5, 138.6, 133.0, 132.1, 131.2, 128.1, 126.0, 124.1, 89.8, 22.0.

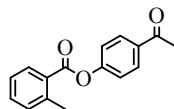

4-acetylphenyl 2-methylbenzoate **3ae**.<sup>15</sup> Yield: 87% (22.1 mg). <sup>1</sup>H NMR (600 MHz, CDCl<sub>3</sub>) δ 8.17 (d, *J* = 7.9 Hz, 1H), 8.07 – 8.03 (m, 2H), 7.50 (td, *J* = 7.5, 1.3 Hz, 1H), 7.36 – 7.30 (m, 4H), 2.68 (s, 3H), 2.62 (s, 3H); <sup>13</sup>C NMR (151 MHz, CDCl<sub>3</sub>) δ 196.9, 165.1, 154.7, 141.6, 134.7, 133.1,

132.1, 131.3, 130.0, 128.0, 126.0, 122.1, 26.6, 22.0.

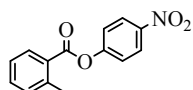

4-nitrophenyl 2-methylbenzoate **3af**.<sup>16</sup> Yield: 77% (19.8 mg). <sup>1</sup>H NMR (600 MHz, CDCl<sub>3</sub>) δ 8.39 – 8.30 (m, 2H), 8.21 – 8.12 (m, 1H), 7.53 (td, *J* = 7.6, 1.3 Hz, 1H), 7.45 – 7.39 (m, 2H), 7.35 (t, *J* = 7.5 Hz, 2H), 2.68 (s, 3H); <sup>13</sup>C NMR (151 MHz, CDCl<sub>3</sub>) δ 164.6, 155.8, 145.4, 141.9, 133.5, 132.2, 131.3, 127.4, 126.1, 125.3, 122.8, 22.0.

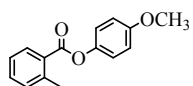

4-methoxyphenyl 2-methylbenzoate **3ag**.<sup>17</sup> Yield: 91% (22.0 mg). <sup>1</sup>H NMR (600 MHz, CDCl<sub>3</sub>) δ 8.17 – 8.06 (m, 1H), 7.46 (td, *J* = 7.5, 1.4 Hz, 1H), 7.31 (t, *J* = 8.1 Hz, 2H), 7.16 – 7.07 (m, 2H), 7.00 – 6.84 (m, 2H), 3.81 (s, 3H), 2.67 (s, 3H); <sup>13</sup>C NMR (151 MHz, CDCl<sub>3</sub>) δ 166.2, 157.3, 144.4, 141.2, 132.6, 131.9, 131.1, 128.7, 125.9, 122.6, 114.5, 55.6, 21.9.

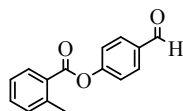

4-formylphenyl 2-methylbenzoate **3ah**.<sup>15</sup> Yield: 82% (19.7 mg). <sup>1</sup>H NMR (600 MHz, CDCl<sub>3</sub>) δ 10.02 (s, 1H), 8.17 (d, *J* = 7.8 Hz, 1H), 8.03 – 7.88 (m, 2H), 7.51 (td, *J* = 7.6, 1.1 Hz, 1H), 7.45 – 7.37 (m, 2H), 7.37 – 7.29 (m, 2H), 2.68 (s, 3H); <sup>13</sup>C NMR (151 MHz, CDCl<sub>3</sub>) δ 191.0, 165.0, 155.7, 141.7, 134.0, 133.2, 132.2, 131.3, 131.3, 127.8, 126.1, 122.7, 22.0.

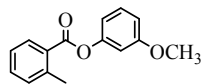

3-methoxyphenyl 2-methylbenzoate **3ai**.<sup>18</sup> Yield: 88% (21.3 mg). <sup>1</sup>H NMR (600 MHz, CDCl<sub>3</sub>) δ 8.18 – 8.11 (m, 1H), 7.47 (td, *J* = 7.5, 1.3 Hz, 1H), 7.36 – 7.27 (m, 3H), 6.85 – 6.78 (m, 2H), 6.76 (t, *J* = 2.3 Hz, 1H), 3.82 (s, 3H), 2.67 (s, 3H); <sup>13</sup>C NMR (151 MHz, CDCl<sub>3</sub>) δ 165.8, 160.6, 151.9, 141.4, 132.8, 132.0, 131.2, 129.9, 128.6, 125.9, 114.1, 111.8, 107.8, 55.5, 22.0.

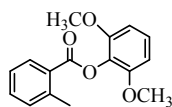

2,6-dimethoxyphenyl 2-methylbenzoate **3aj**. Yield: 84% (22.8 mg). <sup>1</sup>H NMR (600 MHz, CDCl<sub>3</sub>) δ 8.18 (d, *J* = 7.9 Hz, 1H), 7.44 (td, *J* = 7.5, 1.4 Hz, 1H), 7.30 (t, *J* = 7.8 Hz, 2H), 7.16 (t, *J* = 8.4 Hz, 1H), 6.65 (d, *J* = 8.5 Hz, 2H), 3.82 (s, 6H), 2.67 (s, 3H); <sup>13</sup>C NMR (151 MHz, CDCl<sub>3</sub>) δ 165.4, 152.6, 140.9, 132.3, 131.6, 131.4, 129.0, 128.9, 126.2, 125.8, 105.0, 56.2, 21.7; MS (EI) *m/z* (%) 272.1(M<sup>+</sup>, 0.3), 119.0(100), 91.0(54), 65.0(26), 39.0(11); Anal. Calcd for C<sub>16</sub>H<sub>16</sub>O<sub>4</sub>: C, 70.58; H, 5.92; Found: C, 70.60; H, 5.88.

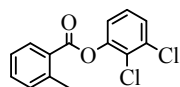

2,3-dichlorophenyl 2-methylbenzoate **3ak**. Yield: 100% (28.0 mg). <sup>1</sup>H NMR (600 MHz, CDCl<sub>3</sub>) δ 8.24 (dd, *J* = 7.8, 1.2 Hz, 1H), 7.51 (td, *J* = 7.5, 1.4 Hz, 1H), 7.40 (dd, *J* = 8.1, 1.5 Hz, 1H), 7.37 – 7.31 (m, 2H), 7.27 (t, *J* = 8.1 Hz, 1H), 7.19 (dd, *J* = 8.1, 1.5 Hz, 1H), 2.68 (s, 3H); <sup>13</sup>C NMR (151

MHz, CDCl<sub>3</sub>)  $\delta$  164.5, 148.6, 141.8, 134.0, 133.2, 132.1, 131.5, 127.8, 127.5, 127.5, 126.7, 126.1, 122.3, 21.9; MS (EI)  $m/z$  (%) 280.0(M<sup>+</sup>, 0.2), 118.9(100), 90.9(35), 65.0(12), 38.9(2); Anal. Calcd for C<sub>14</sub>H<sub>10</sub>Cl<sub>2</sub>O<sub>2</sub>: C, 59.81; H, 3.59; Found: C, 59.90; H, 3.56.

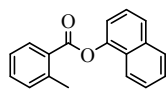

naphthalen-1-yl 2-methylbenzoate **3al**.<sup>19</sup> Yield: 93% (24.4 mg). <sup>1</sup>H NMR (600 MHz, CDCl<sub>3</sub>)  $\delta$  8.38 (dd,  $J$  = 7.8, 1.2 Hz, 1H), 7.97 – 7.92 (m, 1H), 7.89 (dd,  $J$  = 7.0, 2.2 Hz, 1H), 7.77 (d,  $J$  = 8.3 Hz, 1H), 7.55 – 7.46 (m, 4H), 7.41 – 7.33 (m, 3H), 2.71 (s, 3H); <sup>13</sup>C NMR (151 MHz, CDCl<sub>3</sub>)  $\delta$  165.7, 146.9, 141.8, 134.8, 132.9, 132.2, 131.3, 128.3, 128.1, 127.1, 126.5, 126.5, 126.1, 126.0, 125.5, 121.3, 118.3, 22.1.

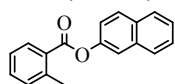

naphthalen-2-yl 2-methylbenzoate **3am**.<sup>20</sup> Yield: 100% (26.2 mg). <sup>1</sup>H NMR (600 MHz, CDCl<sub>3</sub>)  $\delta$  8.22 (dd,  $J$  = 7.8, 1.1 Hz, 1H), 7.89 (d,  $J$  = 8.8 Hz, 1H), 7.86 (d,  $J$  = 7.9 Hz, 1H), 7.82 (d,  $J$  = 7.9 Hz, 1H), 7.68 (d,  $J$  = 2.2 Hz, 1H), 7.51 – 7.43 (m, 3H), 7.37 – 7.30 (m, 3H), 2.70 (s, 3H); <sup>13</sup>C NMR (151 MHz, CDCl<sub>3</sub>)  $\delta$  165.0, 147.5, 140.4, 132.8, 131.8, 131.0, 130.5, 130.2, 128.4, 127.5, 126.8, 126.6, 125.5, 124.9, 124.7, 120.4, 117.7, 21.0.

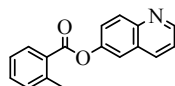

quinolin-6-yl 2-methylbenzoate **3an**. Yield: 88% (23.1 mg). <sup>1</sup>H NMR (600 MHz, CDCl<sub>3</sub>)  $\delta$  8.92 (dd,  $J$  = 4.2, 1.6 Hz, 1H), 8.22 (dd,  $J$  = 7.8, 1.1 Hz, 1H), 8.19 (d,  $J$  = 9.1 Hz, 1H), 8.17 – 8.12 (m, 1H), 7.69 (d,  $J$  = 2.5 Hz, 1H), 7.59 (dd,  $J$  = 9.0, 2.6 Hz, 1H), 7.51 (td,  $J$  = 7.5, 1.3 Hz, 1H), 7.42 (dd,  $J$  = 8.3, 4.2 Hz, 1H), 7.37 – 7.32 (m, 2H), 2.71 (s, 3H); <sup>13</sup>C NMR (151 MHz, CDCl<sub>3</sub>)  $\delta$  165.7, 150.2, 148.8, 146.3, 141.6, 135.9, 133.0, 132.1, 131.3, 131.1, 128.6, 128.2, 126.0, 125.1, 121.6, 118.7, 22.0; MS (EI)  $m/z$  (%) 263.0(M<sup>+</sup>, 3), 118.9(100), 91.0(39), 65.0(17), 39.0(5); Anal. Calcd for C<sub>17</sub>H<sub>13</sub>NO<sub>2</sub>: C, 77.55; H, 4.98; N, 5.32. Found: C, 77.60; H, 5.00; N, 5.29.

## Reference:

- [1] Sharma, P.; Rohilla, S.; Jain, N. *J. Org. Chem.* 2017, **82**, 1105-1113.
- [2] Dohi, T.; Koseki, D.; Sumida, K.; Okada, K.; Mizuno, S.; Kato, A.; Morimoto, K.; Kita, Y. *Adv. Syn. Cat.* 2017, **359**, 3503-3508.
- [3] Tu, Y.; Yuan, L.; Wang, T.; Wang, C.; Ke, J.; Zhao, J. *J. Org. Chem.* 2017, **82**, 4970-4976.
- [4] Watson, D. A.; Fan, X.; Buchwald, S. L. *J. Org. Chem.* 2008, **73**, 7096-7101.
- [5] Qi, X.; Li, C. L.; Jiang, L. B.; Zhang, W. Q.; Wu, X. F. *Catal. Sci. Technol.* 2016, **6**, 3099-3107.
- [6] Prangova, L.; Osternack, K.; Voss, J. *J. Chem. Res. (S)* 1995, **6**, 234.
- [7] Bao, Y. S.; Baiyin, M.; Bao, A.; Jia, M.; Bao, Z. *J. Org. Chem.* 2014, **79**, 6715-6719.
- [8] Saharia, G. S.; Sharma, H. R. *Science and Culture* 1979, **45**, 139-44.
- [9] Khedkar, M. V.; Sasaki, T.; Bhanage, B. M. *ACS Catalysis* 2013, **3**, 287-293.
- [10] Okita, T.; Kumazawa, K.; Takise, R.; Muto, K.; Itami, K.; Yamaguchi, J. *Chemistry Letters* 2017, **46**, 218-220.
- [11] Wang, G.; Xu, Y.; Zhang, S.; Li, Z.; Li, C. *Green Chemistry* 2017, **19**, 4838-4848.
- [12] Fitzjarrald, V. P.; Pongdee, R. *Tetrahedron Letters* 2007, **48**, 3553-3557.
- [13] Hayashi, M. *Journal fuer Praktische Chemie* 1929, **123**, 289-312.
- [14] CAS Registry Number: 885575-61-1.
- [15] Um, I.; Lee, J.; Lee, H. W.; Nagano, Y.; Fujio, M.; Tsuno, Y. *J. Org. Chem.* 2005, **70**, 4980-4987.
- [16] Zhang, D.; Pan, C. *Catalysis Communications* 2012, **20**, 41-45.
- [17] Engbersen, J. F. J.; Geurtsen, G.; De Bie, D. A.; Van der Plas, H. C. *Tetrahedron* 1988, **44**, 1795-802.
- [18] Shakoor, S. M. A.; Choudhary, S.; Bajaj, K.; Muthyala, M. K.; Kumar, A.; Sakhuja, R. *RSC Advances* 2015, **5**, 82199-82207.
- [19] Tang, Y.; Huang, J.; Shen, J.; Tan, C. *Chin. Pat. App.* 2012, CN 102614165 A 20120801.
- [20] CAS Registry Number: 666212-54-0.

### 3. 10 Gram-scale synthesis of 3aa

In a 10 gram-scale reaction, pyridin-2-yl 2-methylbenzoate **1a** (10 g, 47.0 mmol), phenol **2a** (7.51 g, 79.9 mmol), K<sub>2</sub>CO<sub>3</sub> (0.65 g, 4.7 mmol), and the solvent (150 mL) were charged in a 250 mL oven-dried round flask. Reaction was carried out 60 °C for 48 h in an oil bath under air condition. After being cooled to room temperature, the reaction solution was evaporated in vacuo. The residue was purified by flash column chromatography (silica gel, ethyl acetate/petroleum ether = 1:5~1:15 as an eluent) to afford the desired product **3aa** (9.85 g, 99% yield).

## Part III. <sup>1</sup>H NMR and <sup>13</sup>C NMR Spectra of the Products

<sup>1</sup>H NMR of phenyl 2-methylbenzoate **3aa**

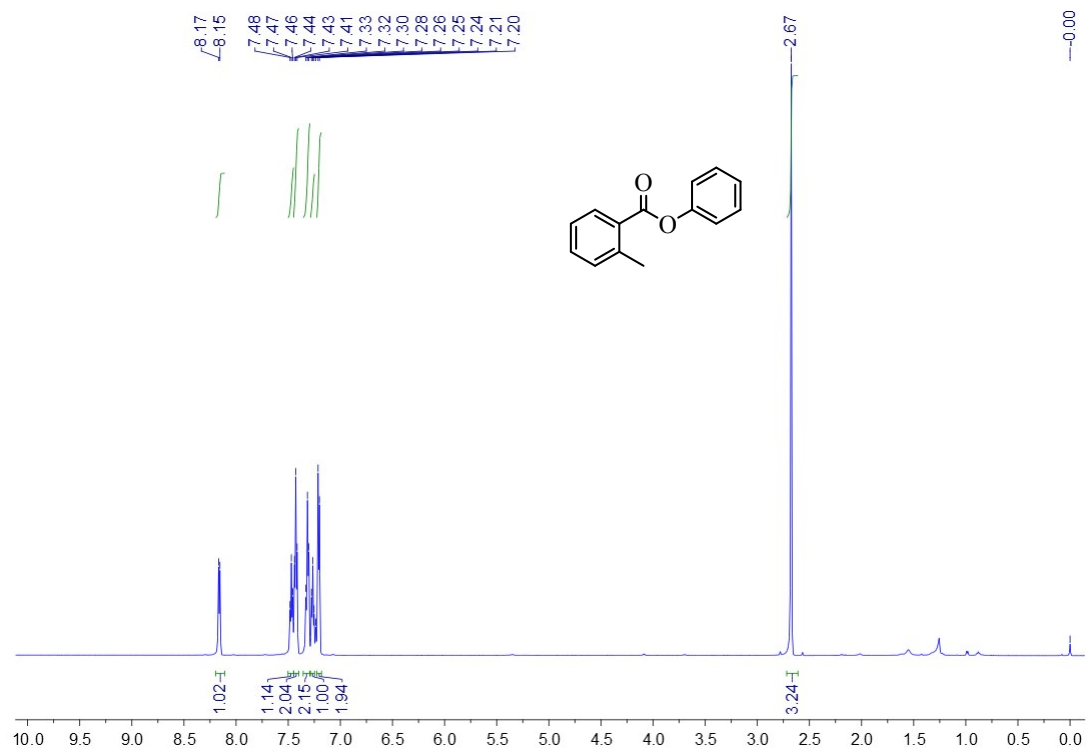

<sup>13</sup>C NMR of phenyl 2-methylbenzoate **3aa**

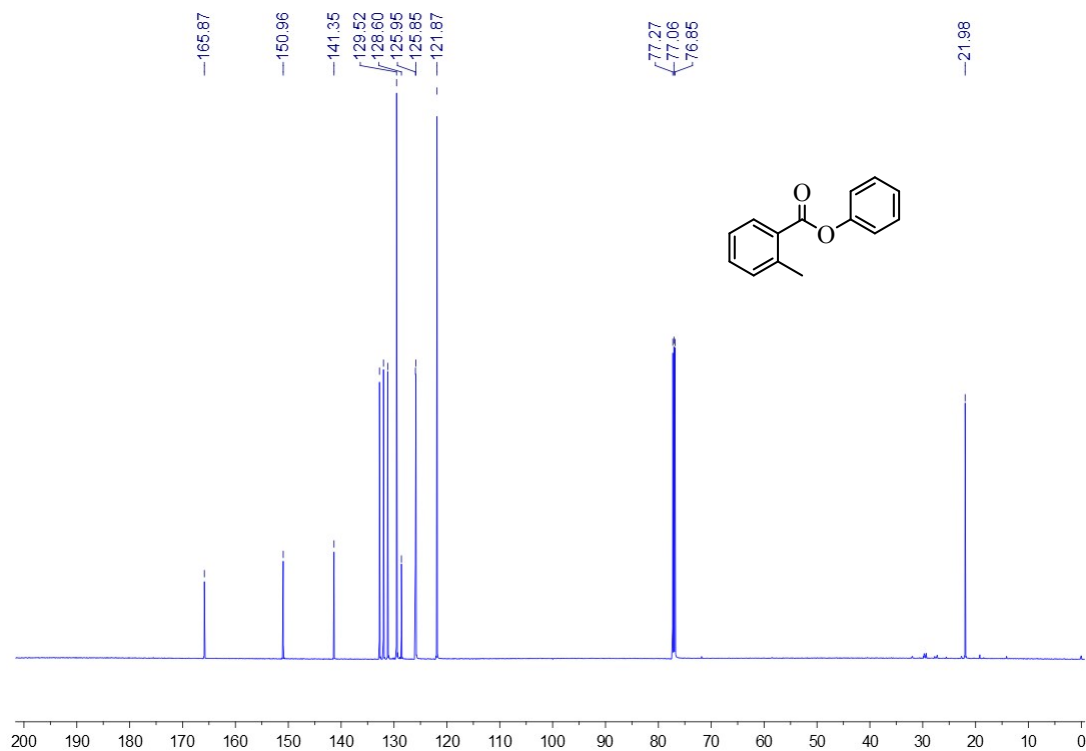

<sup>1</sup>H NMR of phenyl benzoate **3ba**



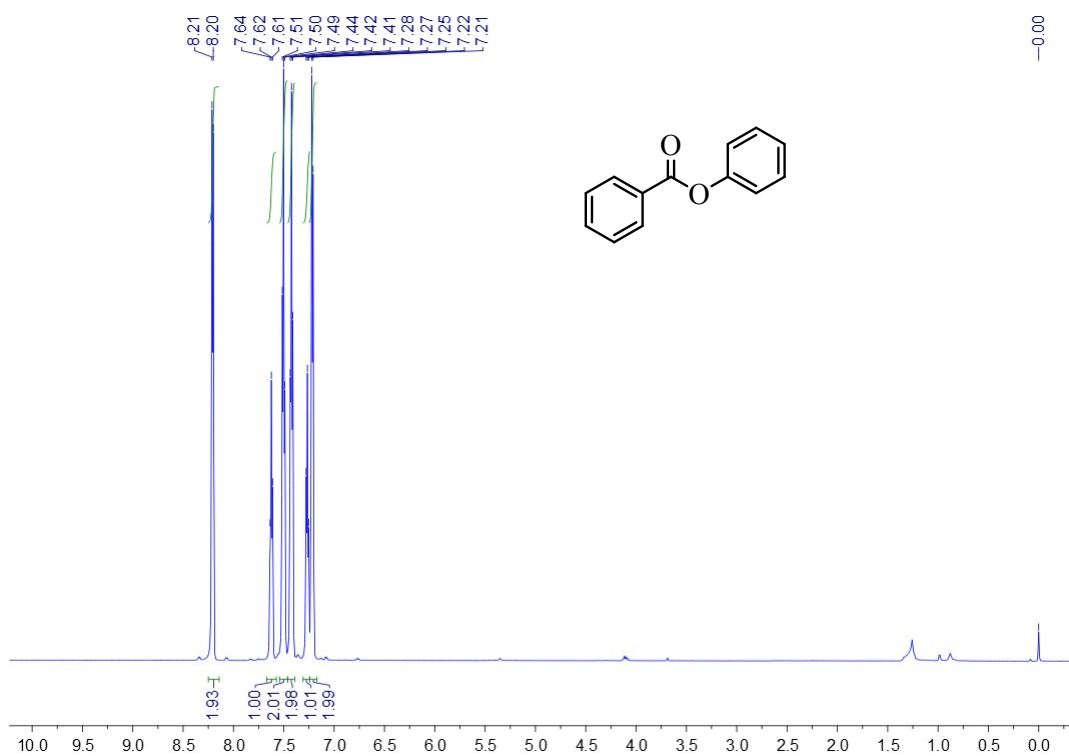

**<sup>13</sup>C NMR of phenyl benzoate **3ba****

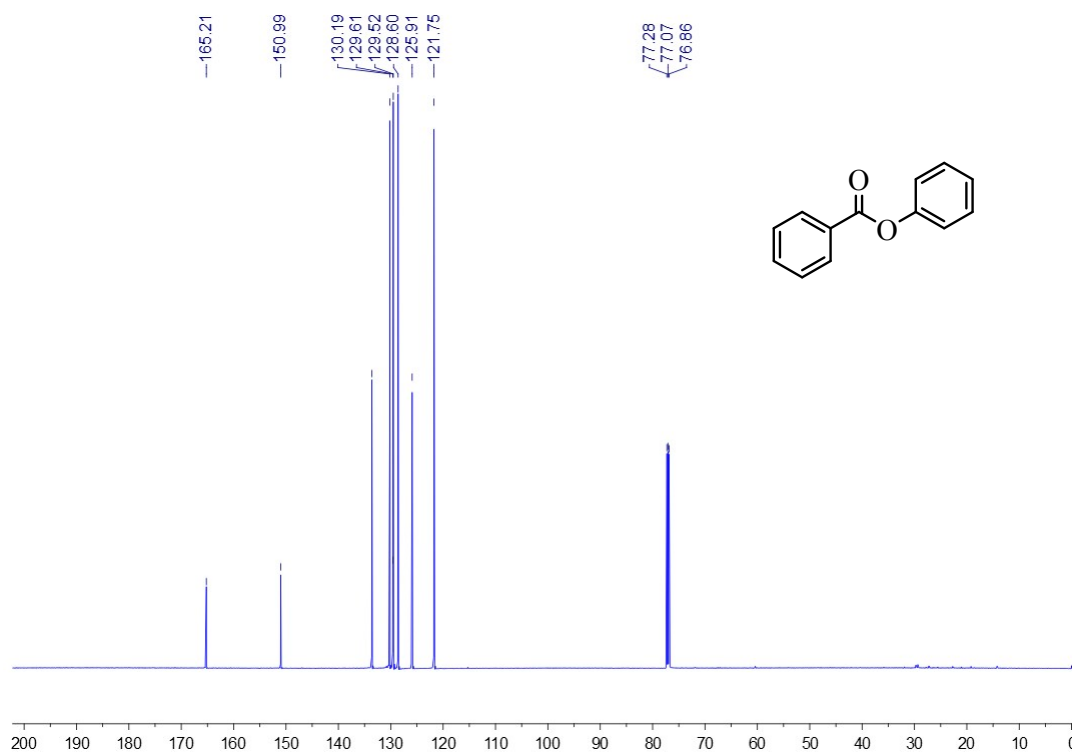

**<sup>1</sup>H NMR of phenyl 4-methylbenzoate **3ca****

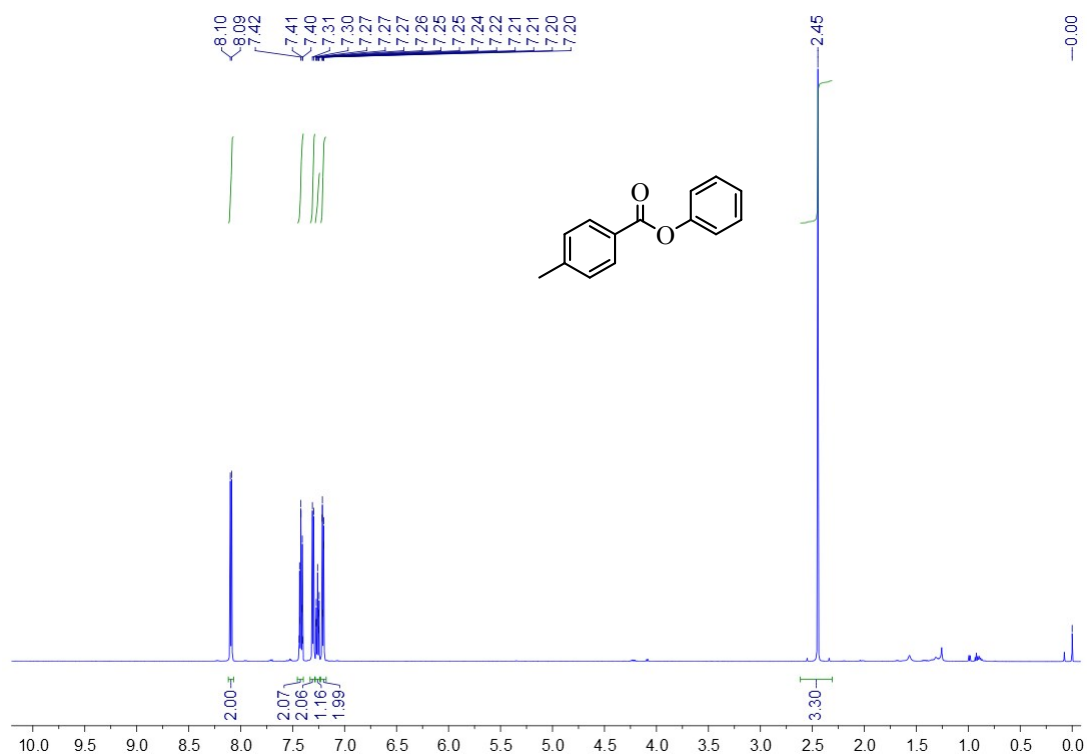

**<sup>13</sup>C NMR of phenyl 4-methylbenzoate **3ca****

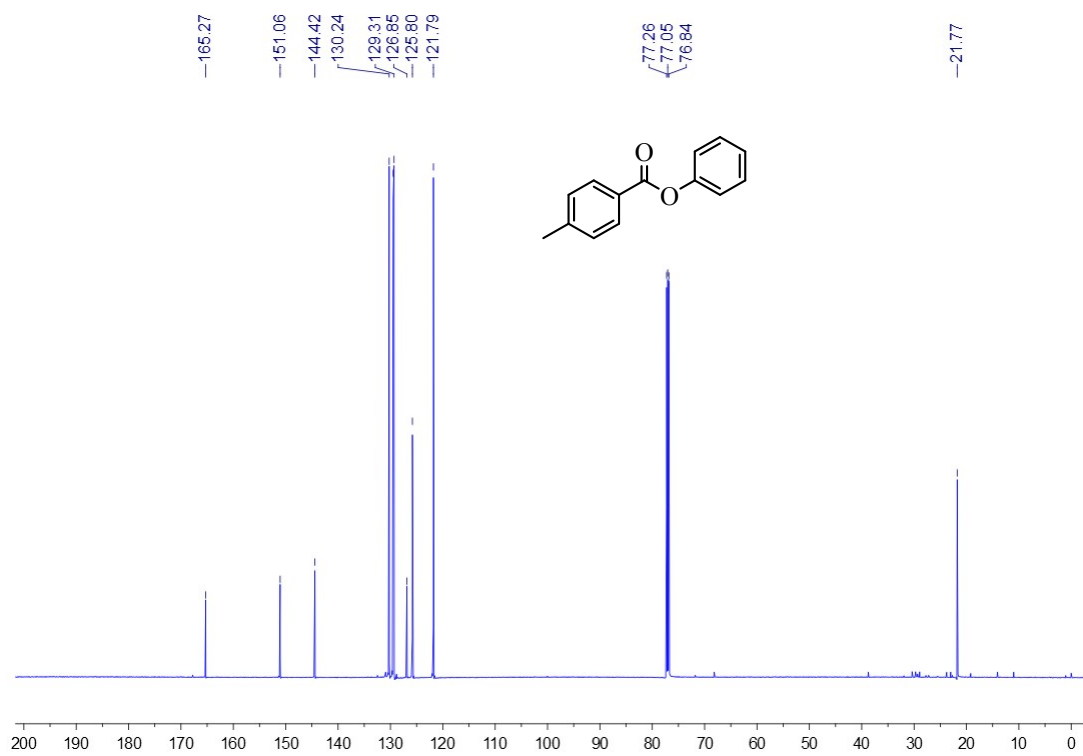

**<sup>1</sup>H NMR of phenyl 3-methylbenzoate **3da****

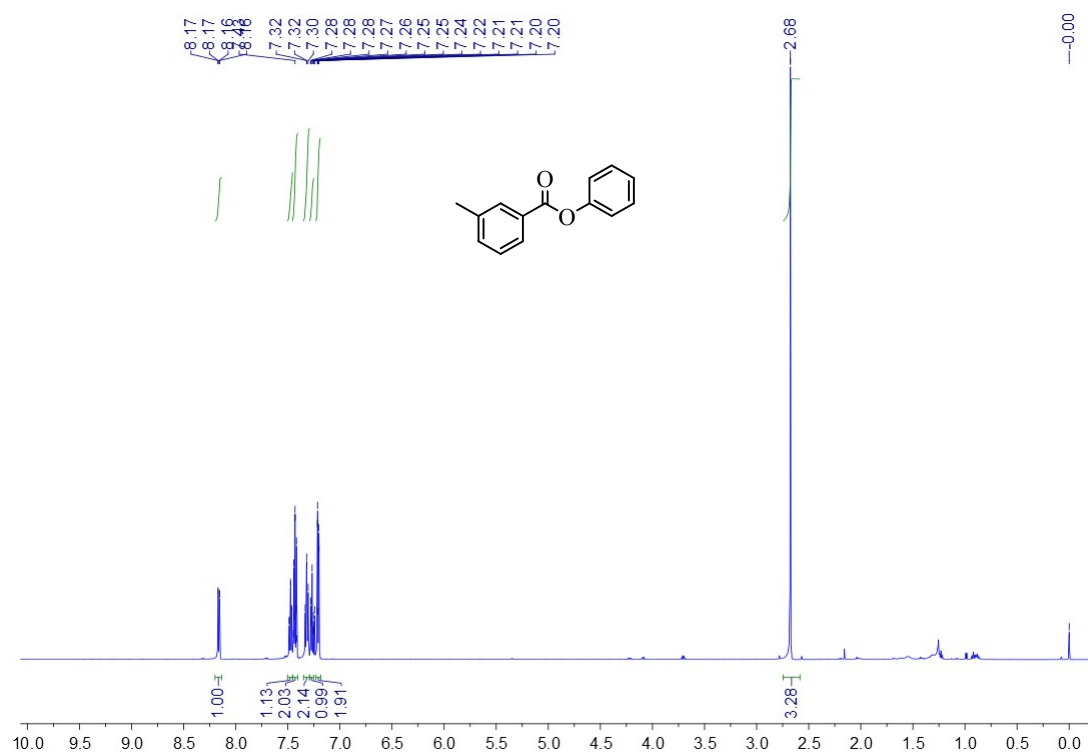

**<sup>13</sup>C NMR of phenyl 3-methylbenzoate **3da****

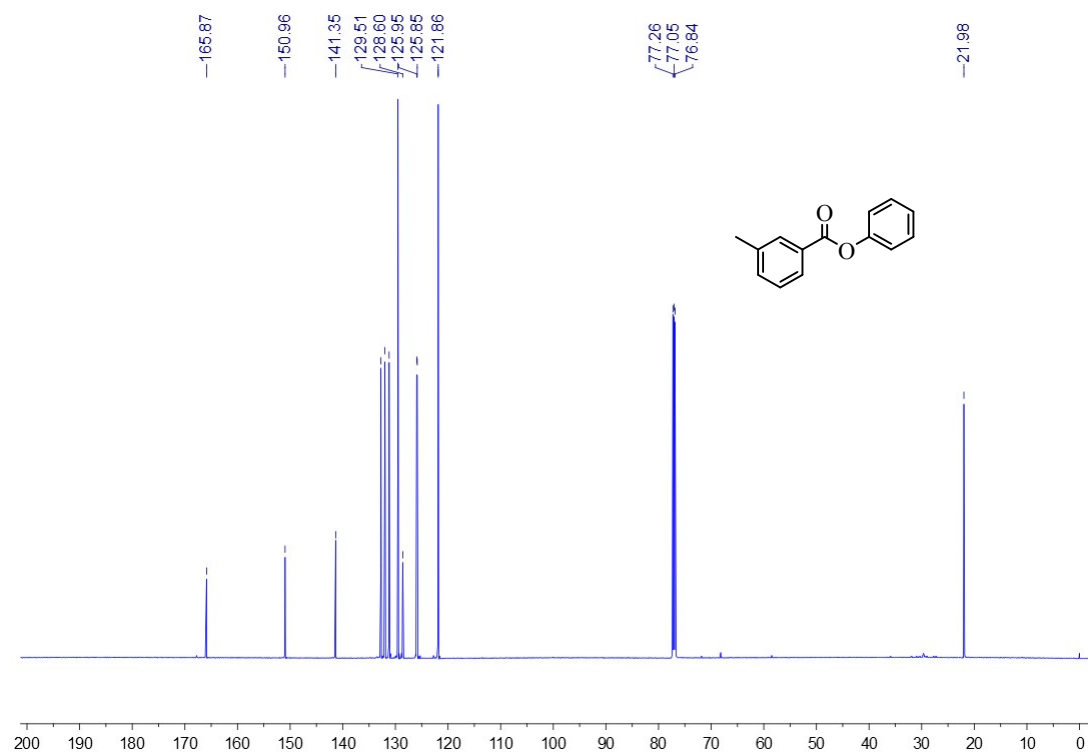

**<sup>1</sup>H NMR of phenyl 4-(tert-butyl)benzoate **3ea****

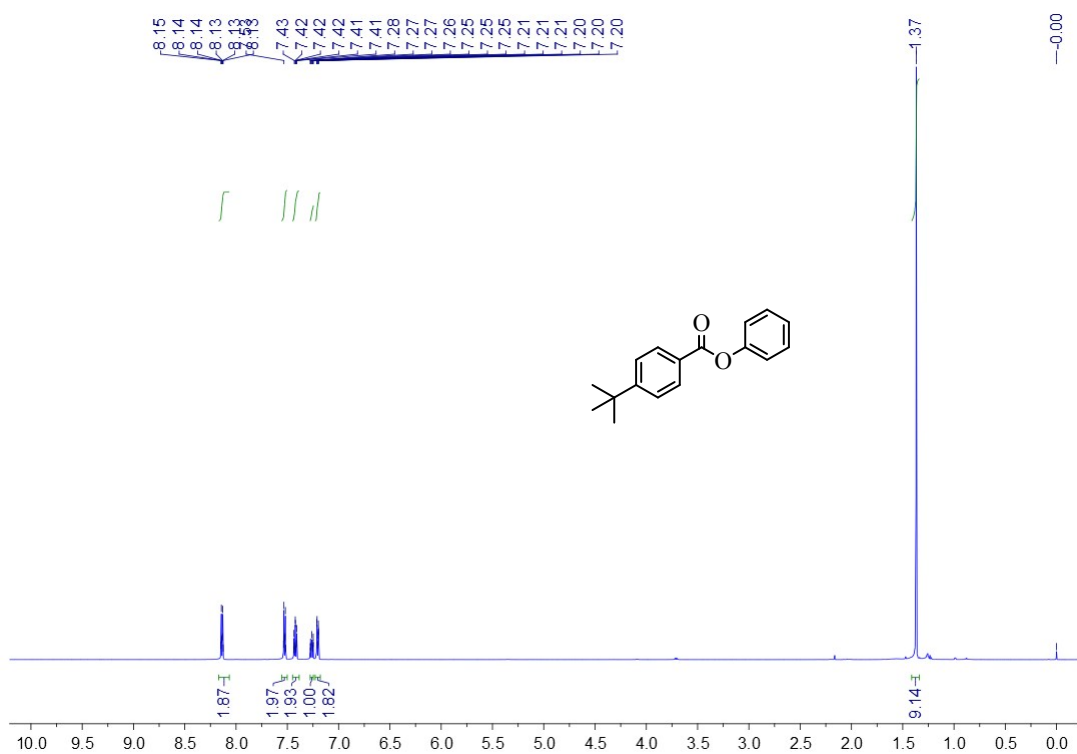

<sup>13</sup>C NMR of phenyl 4-(tert-butyl)benzoate **3ea**

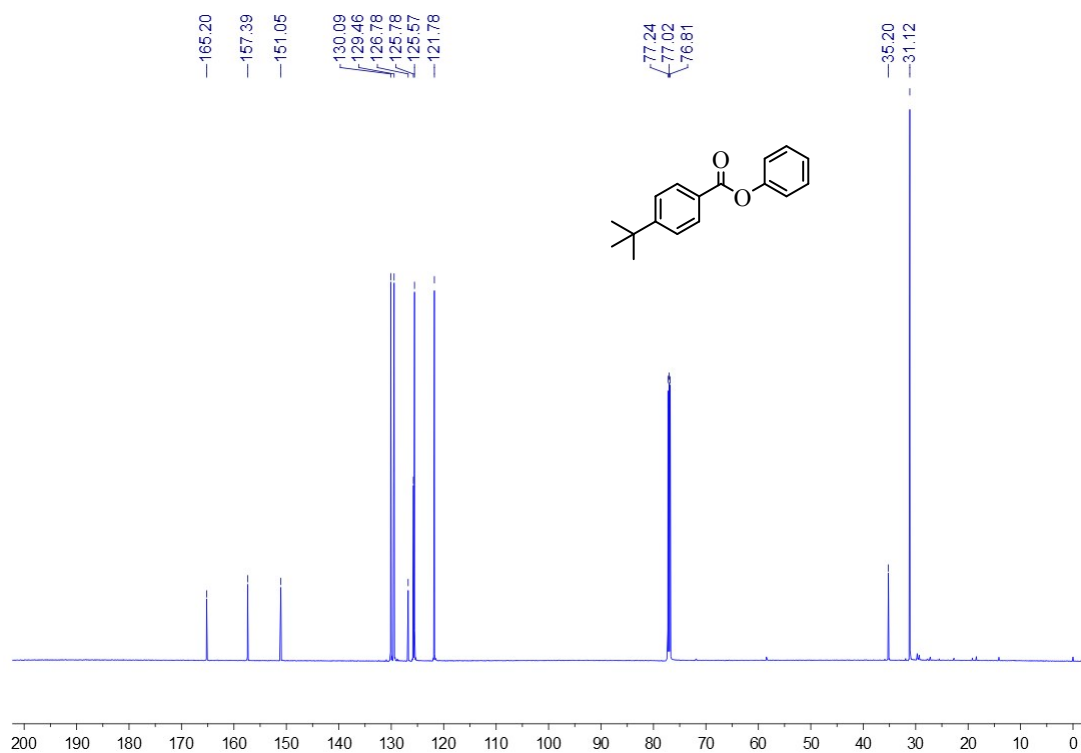

<sup>1</sup>H NMR of phenyl 4-butylbenzoate **3fa**

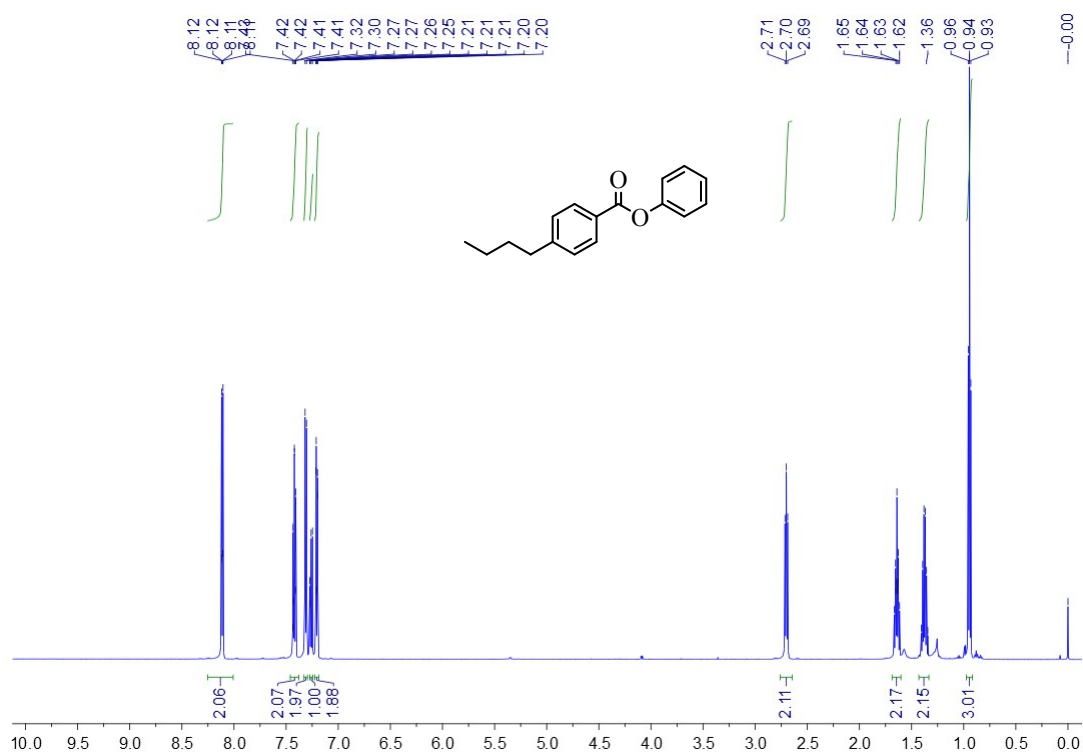

<sup>13</sup>C NMR of phenyl 4-butylbenzoate **3fa**

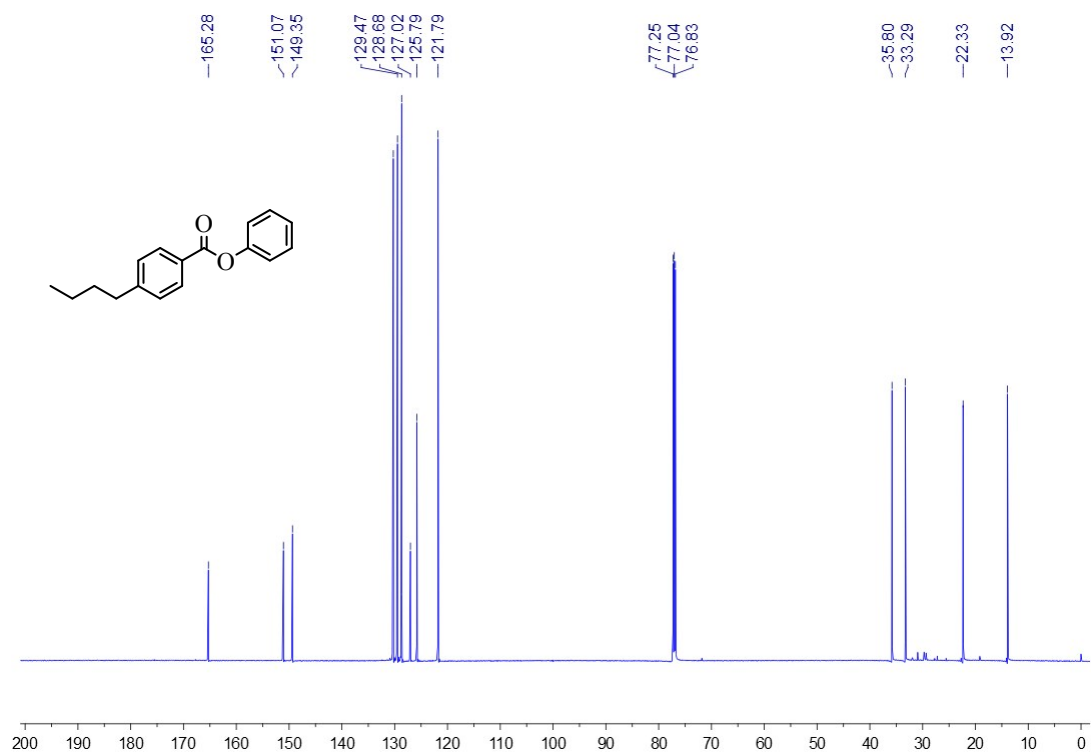

<sup>1</sup>H NMR of phenyl 4-methoxybenzoate **3ga**

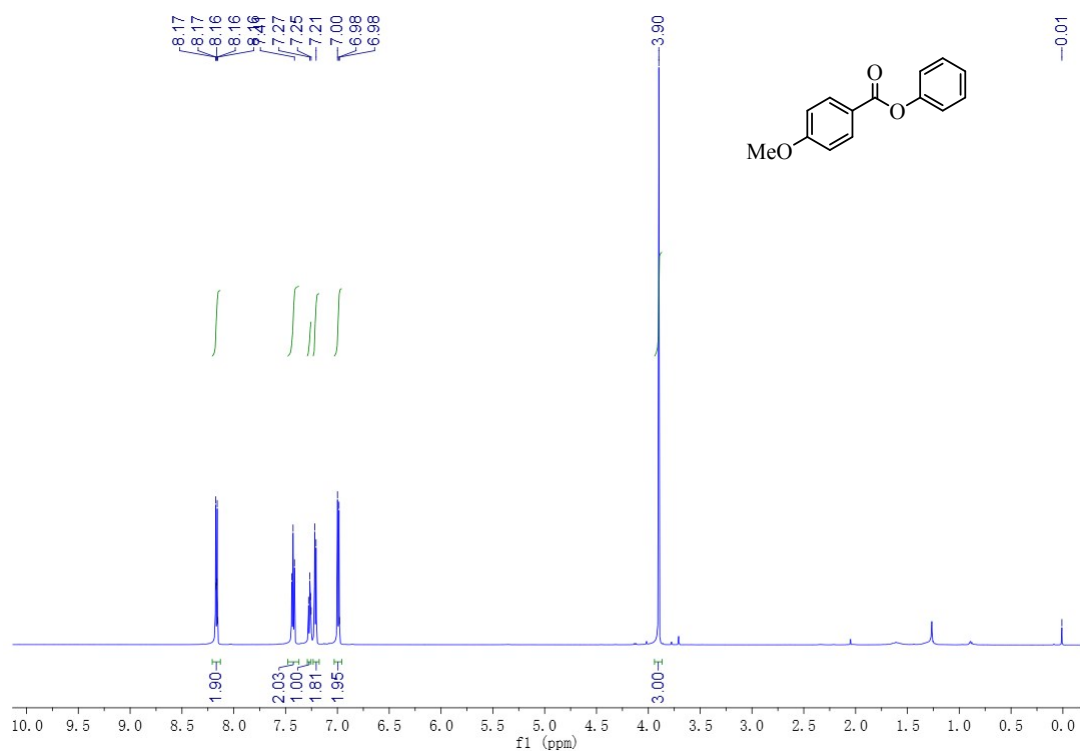

**<sup>13</sup>C NMR of phenyl 4-methoxybenzoate **3ga****

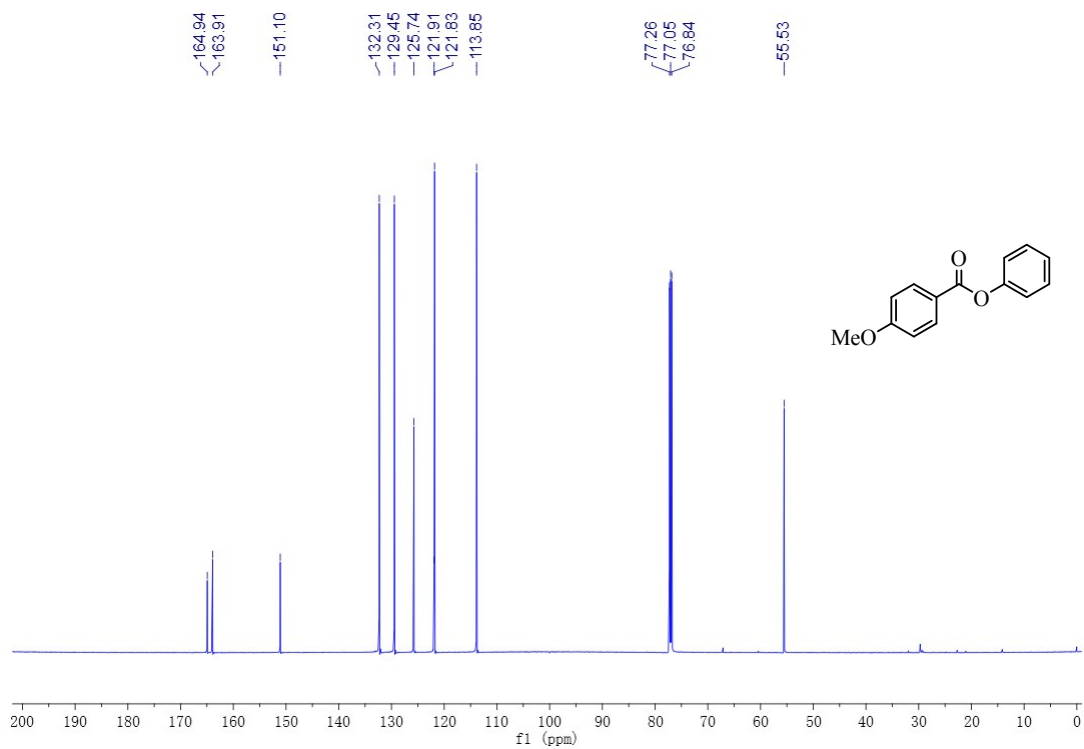

**<sup>1</sup>H NMR of phenyl 4-chlorobenzoate **3ha****

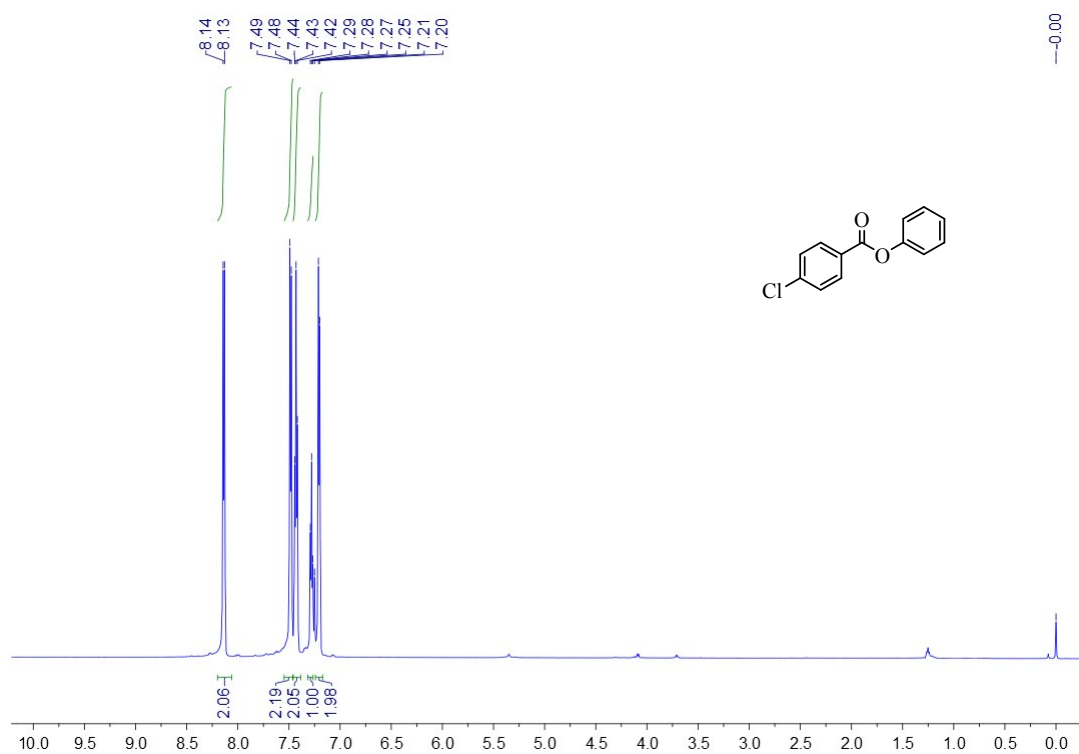

$^{13}\text{C}$  NMR of phenyl 4-chlorobenzoate **3ha**

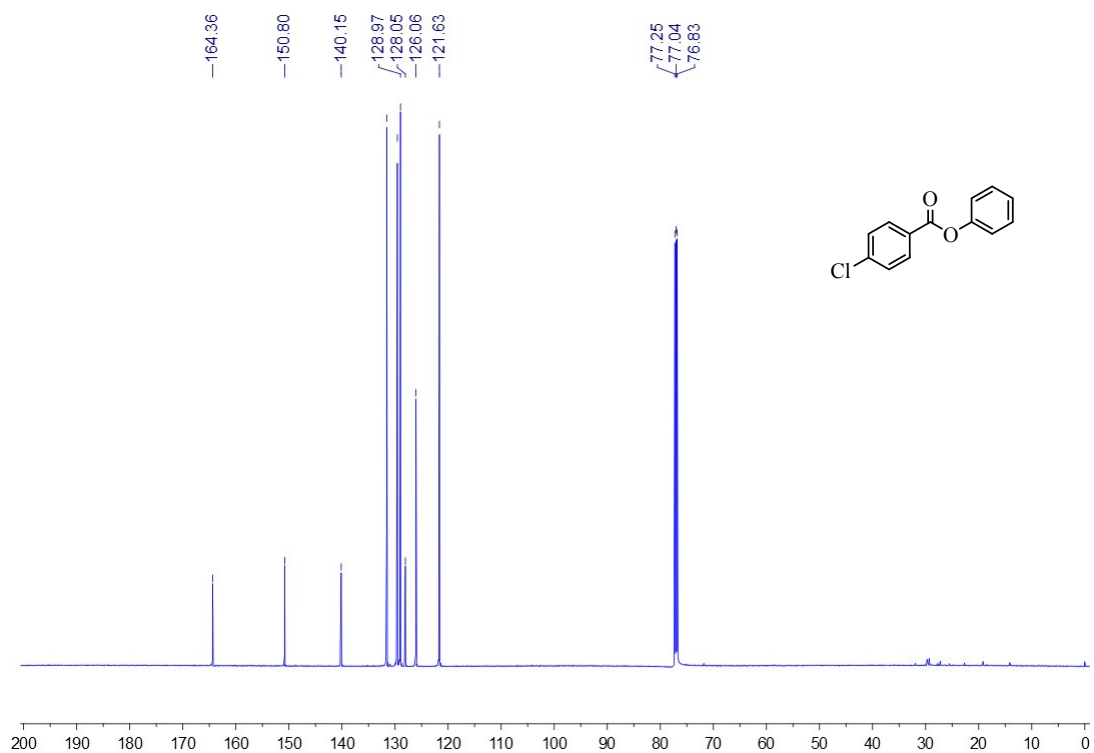

$^1\text{H}$  NMR of phenyl 3-chlorobenzoate **3ia**

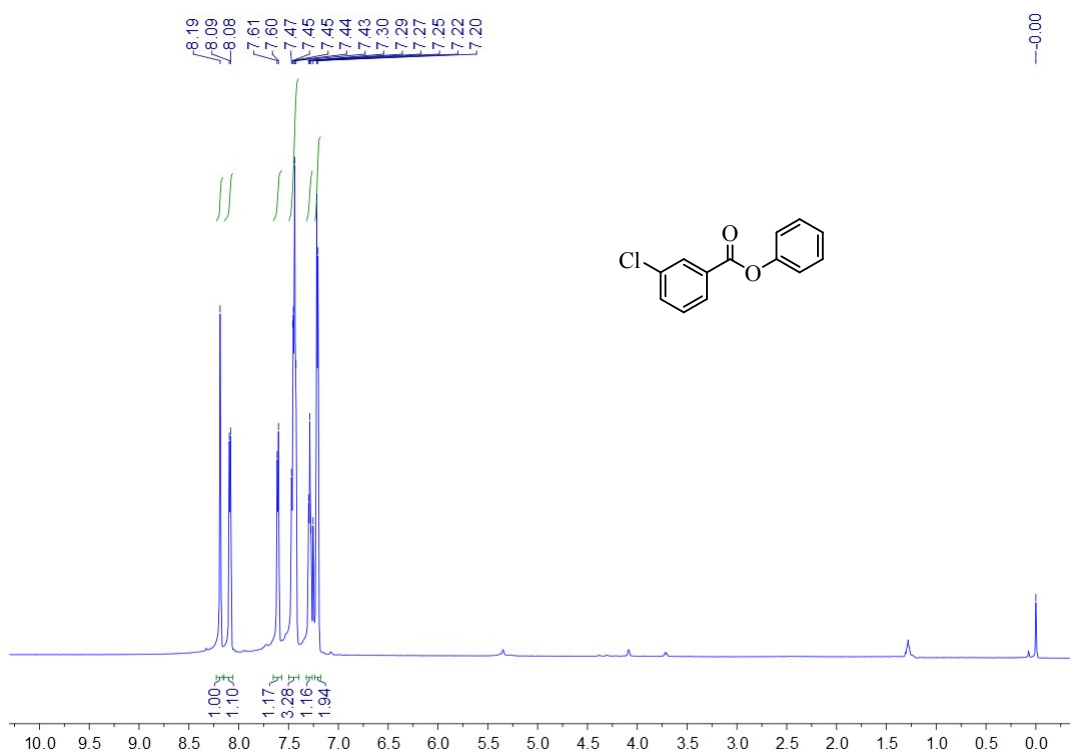

<sup>13</sup>C NMR of phenyl 3-chlorobenzoate **3ia**

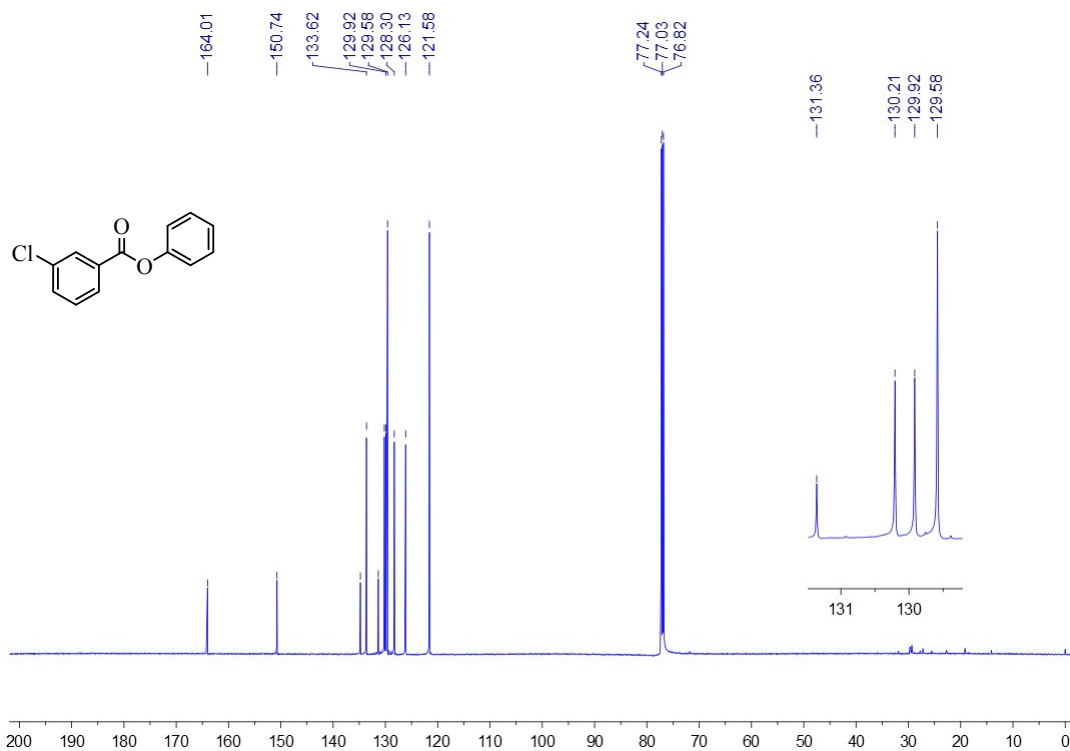

<sup>1</sup>H NMR of phenyl 4-fluorobenzoate **3ja**



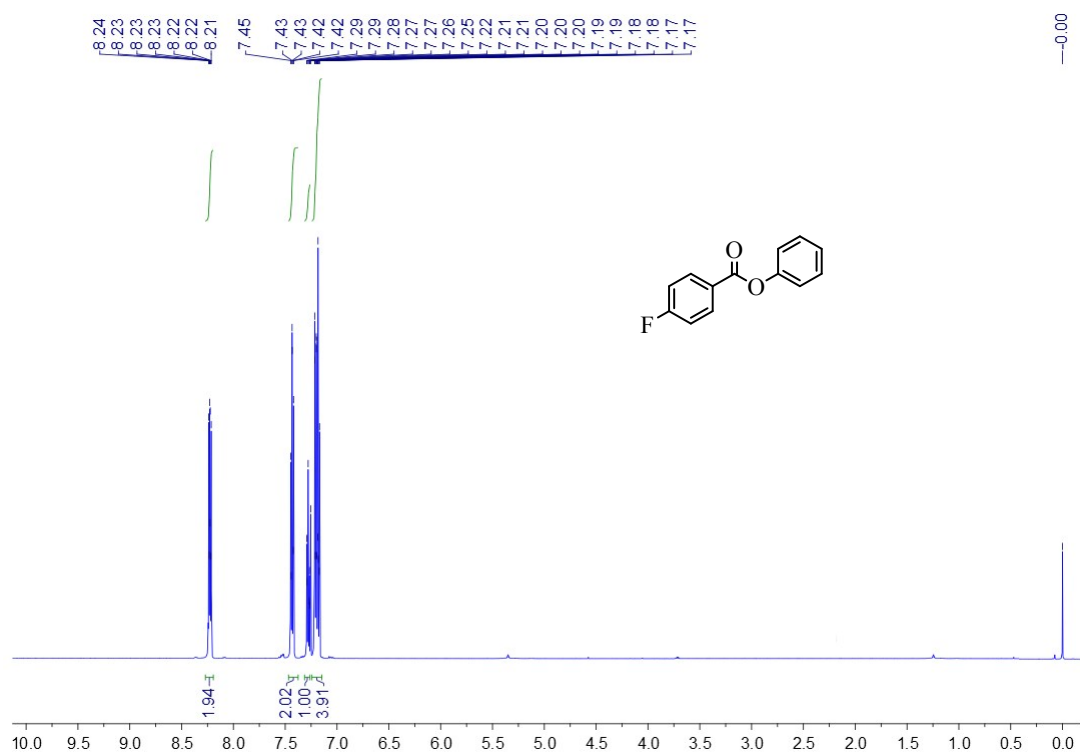

**<sup>13</sup>C NMR of phenyl 4-fluorobenzoate **3ja****

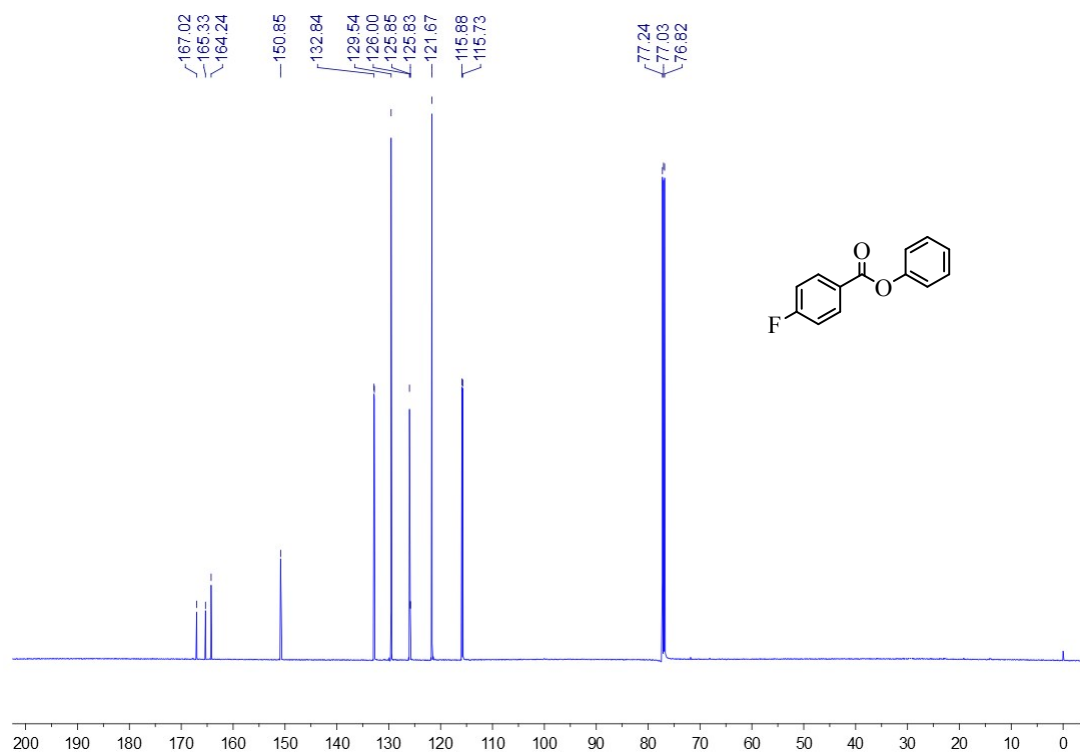

**<sup>1</sup>H NMR of phenyl 2-iodobenzoate **3ka****

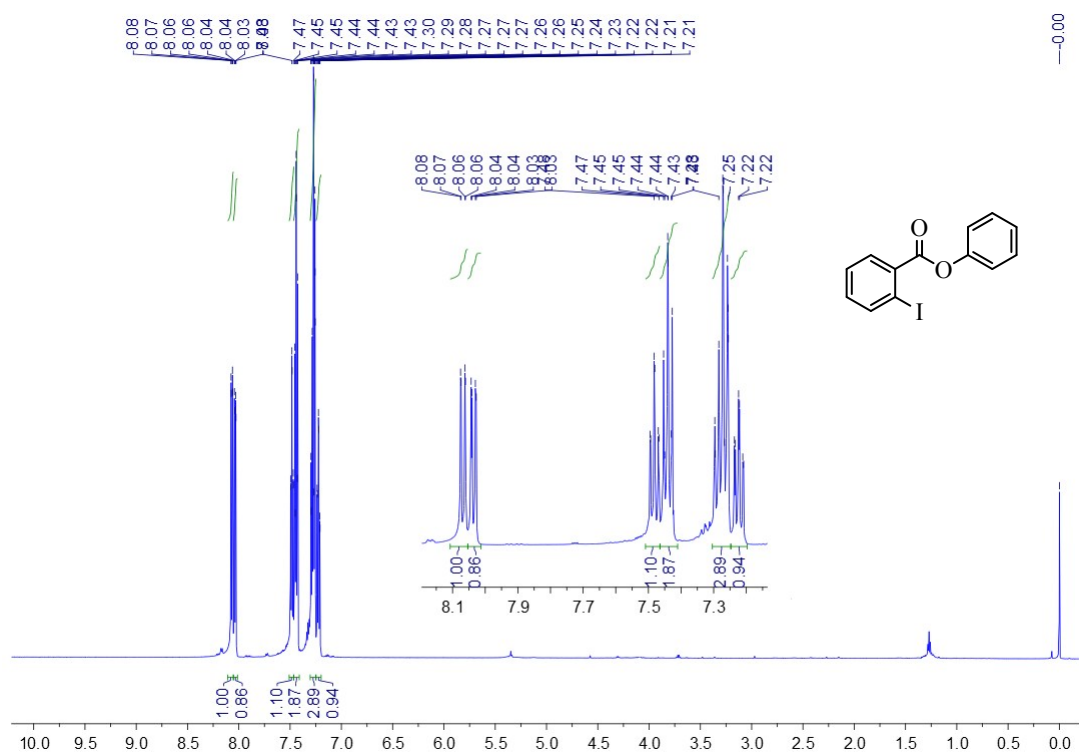

**<sup>13</sup>C NMR of phenyl 2-iodobenzoate **3ka****

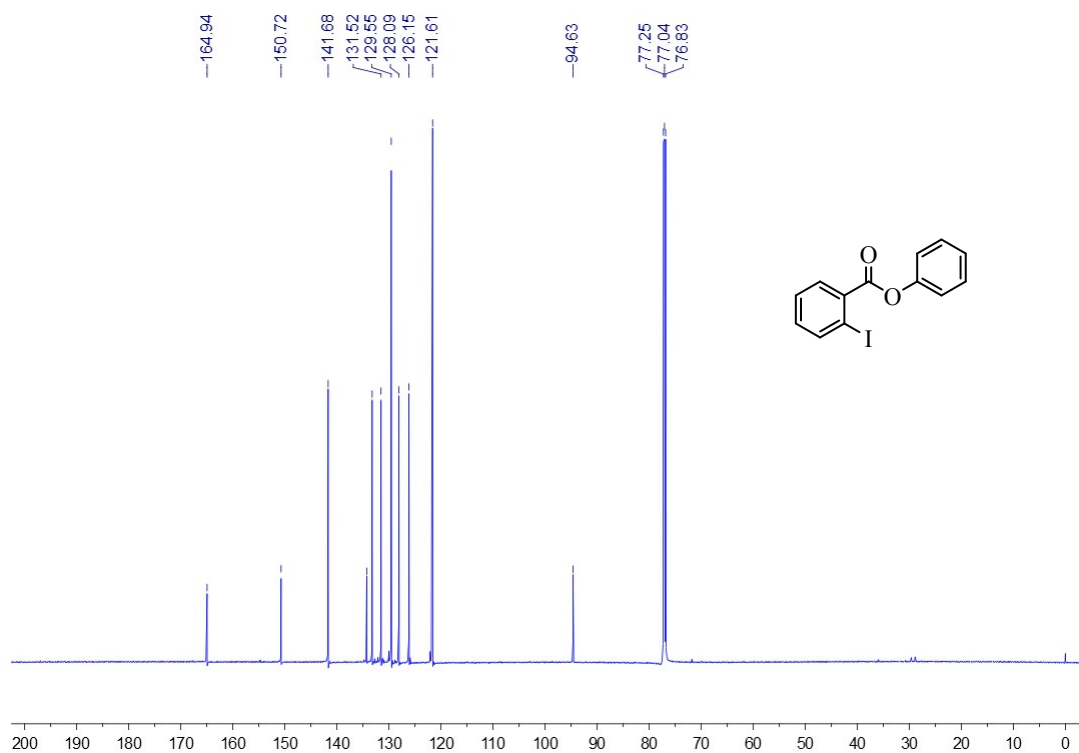

**<sup>1</sup>H NMR of phenyl 3-iodobenzoate **3la****

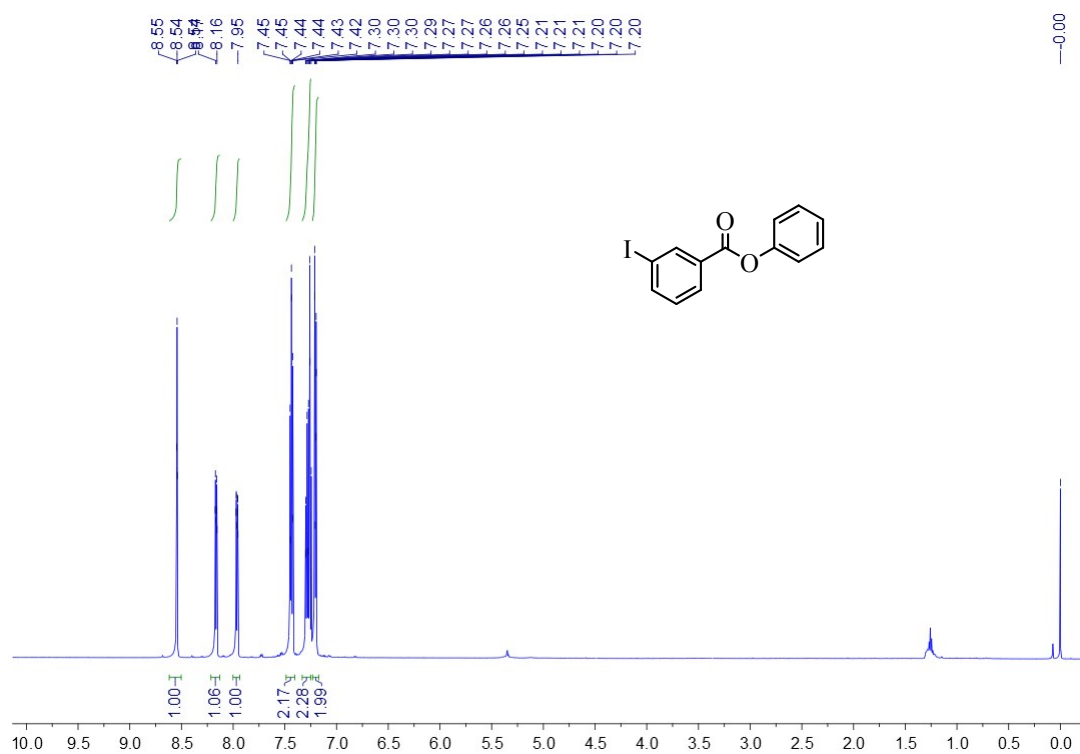

$^{13}\text{C}$  NMR of phenyl 3-iodobenzoate **3la**

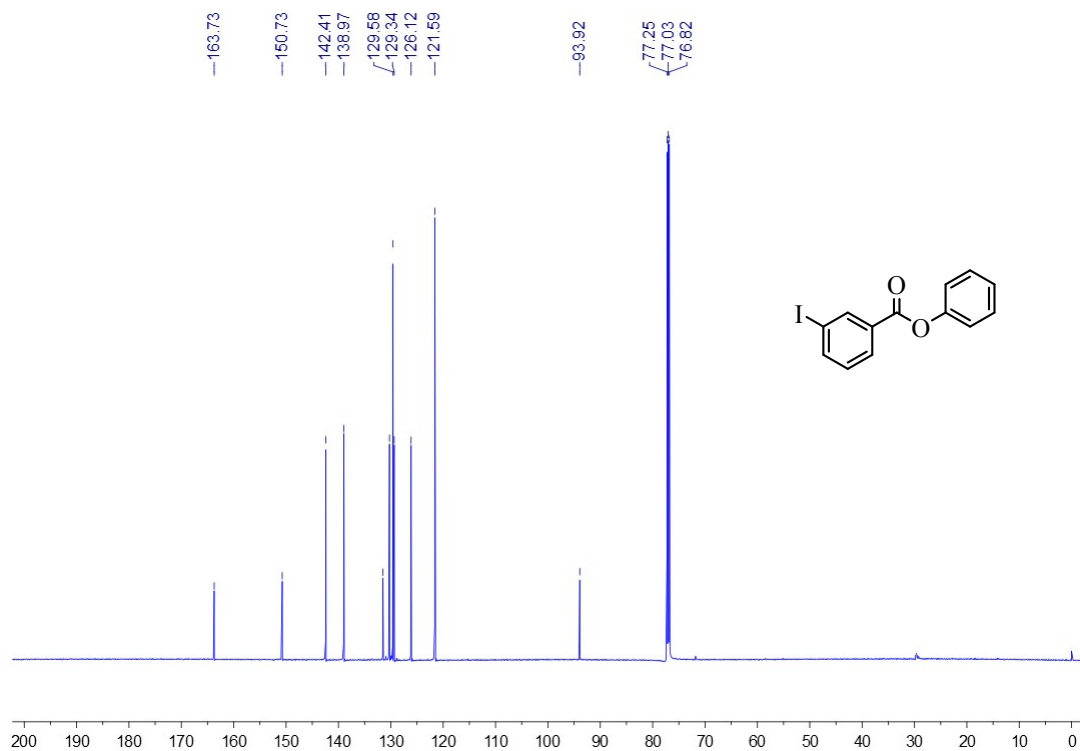

$^1\text{H}$  NMR of phenyl 4-cyanobenzoate **3ma**

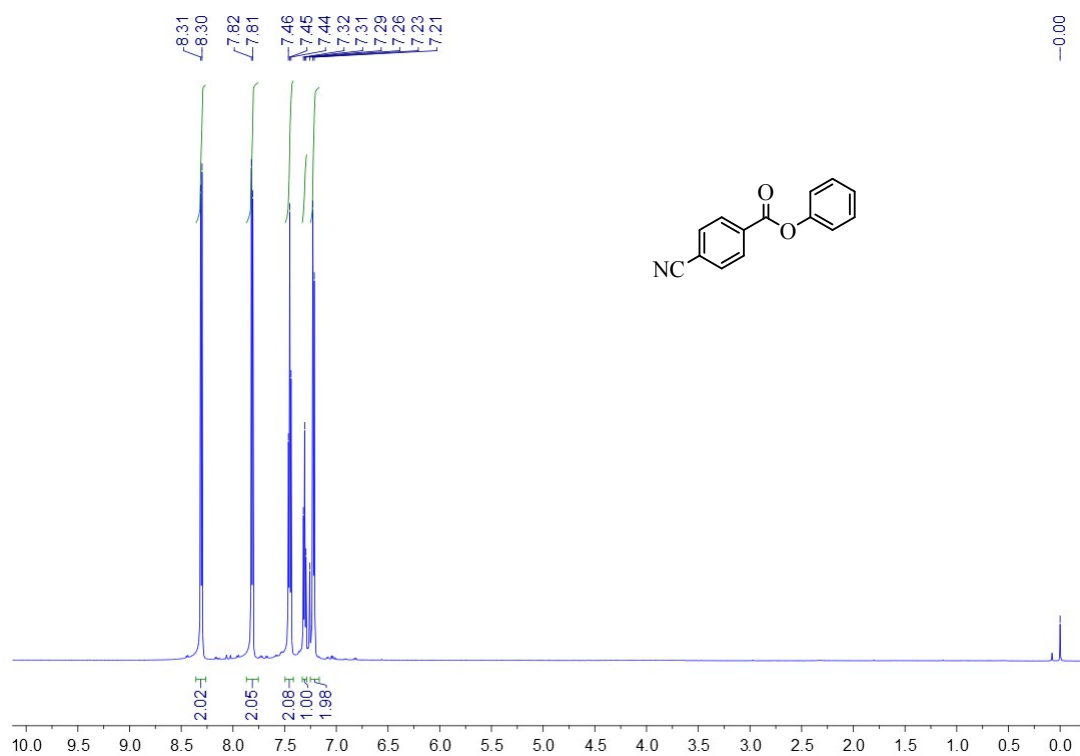

$^{13}\text{C}$  NMR of phenyl 4-cyanobenzoate **3ma**

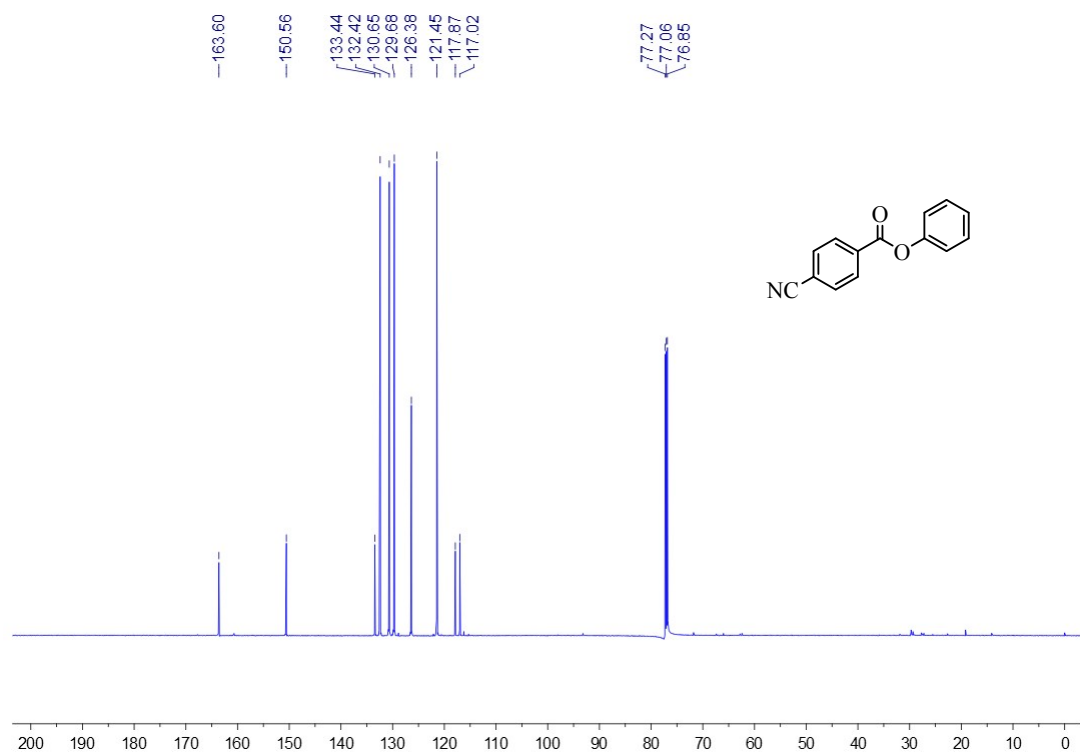

$^1\text{H}$  NMR of phenyl 4-nitrobenzoate **3na**

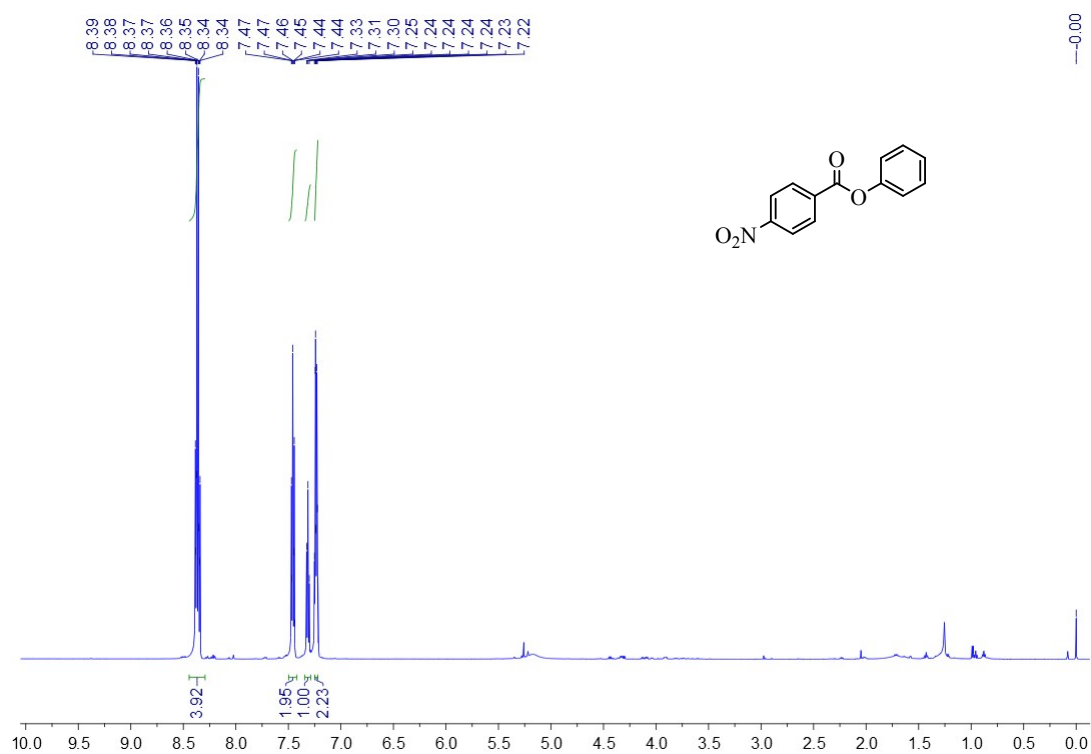

**<sup>13</sup>C NMR of phenyl 4-nitrobenzoate **3na****

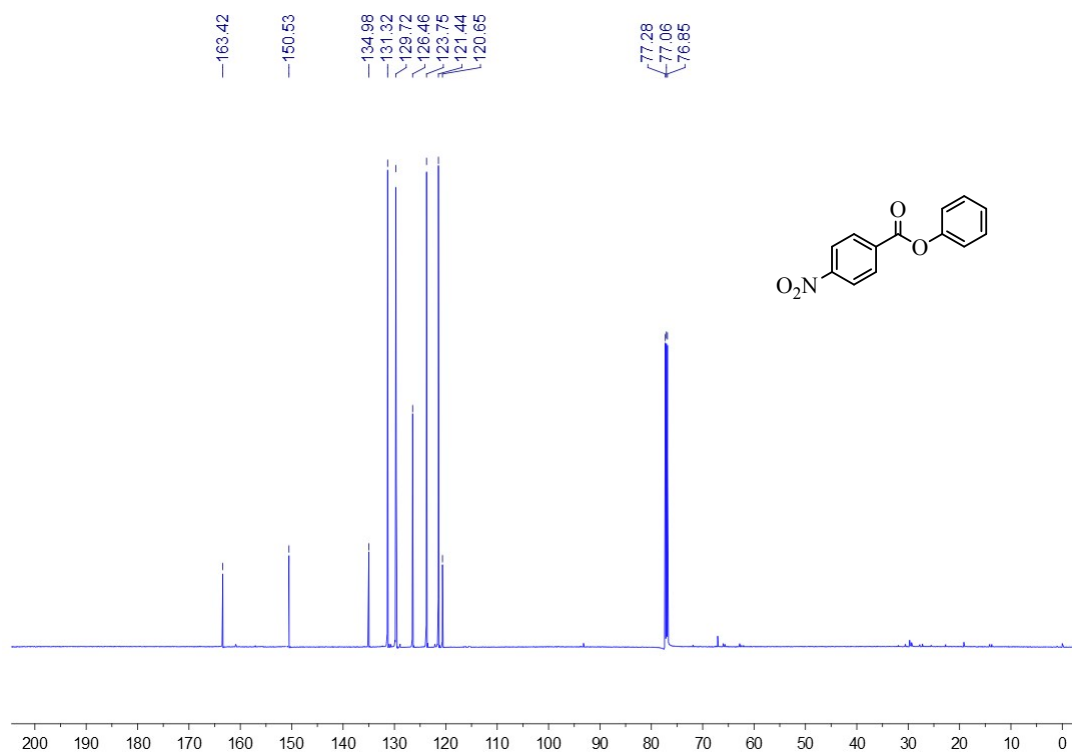

**<sup>1</sup>H NMR of phenyl 3-nitrobenzoate **3oa****

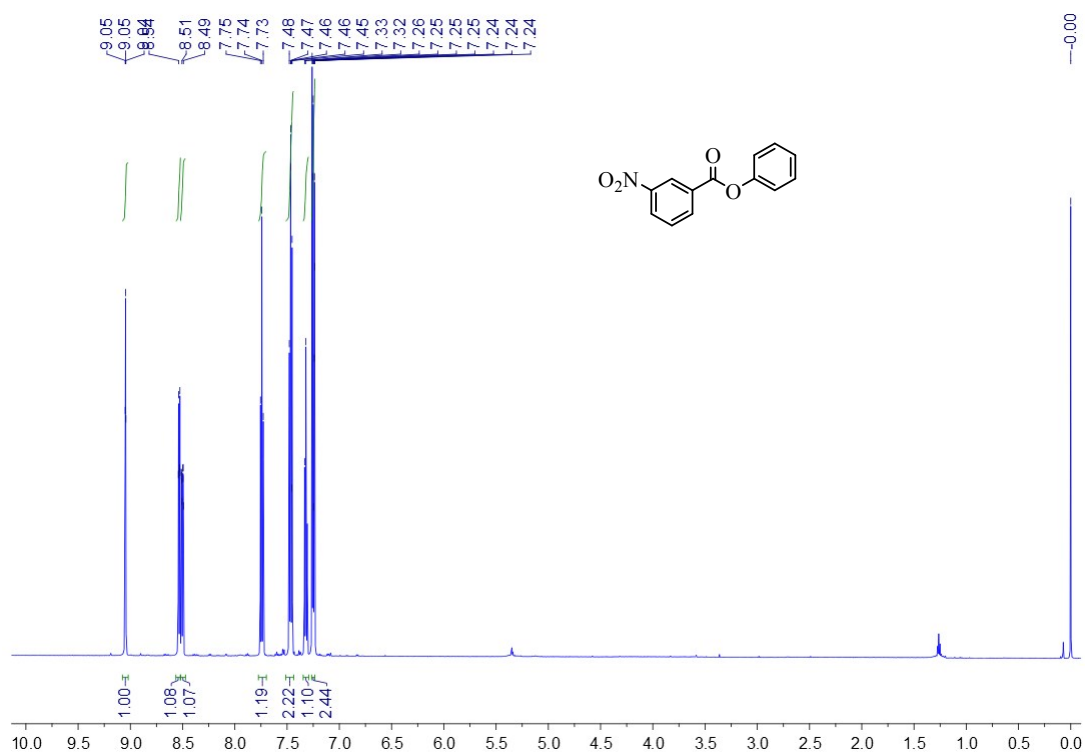

$^1\text{H}$  NMR of phenyl 3-nitrobenzoate **30a**

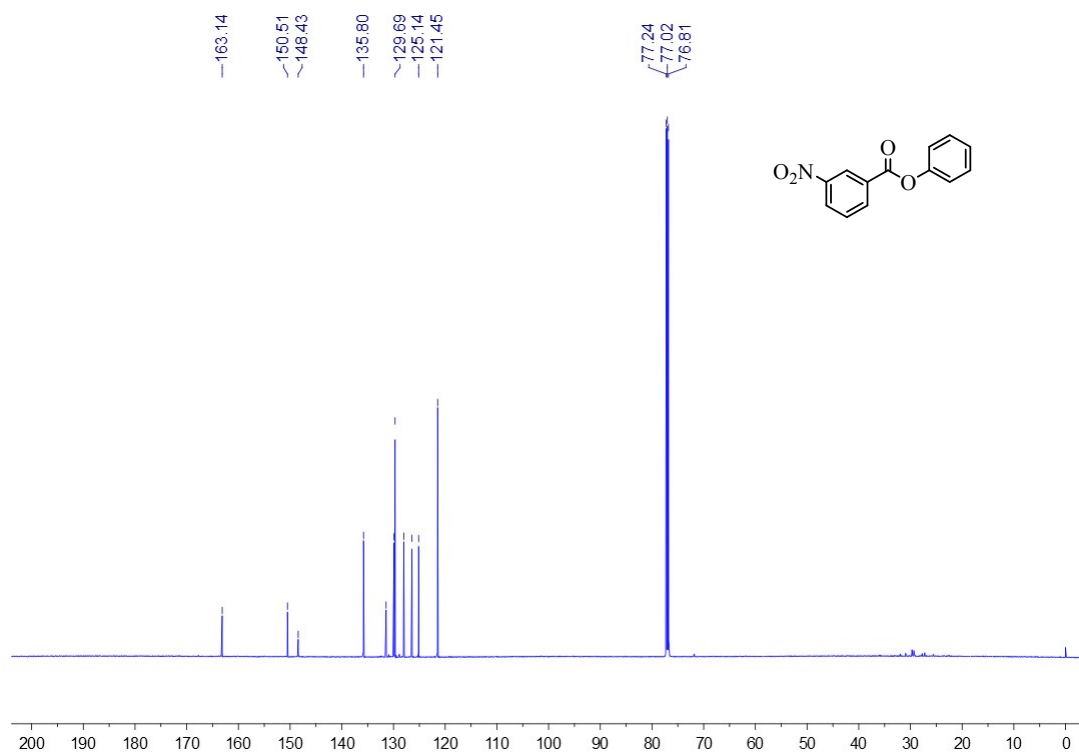

$^{13}\text{C}$  NMR of phenyl 2-chloro-4-nitrobenzoate **3pa**

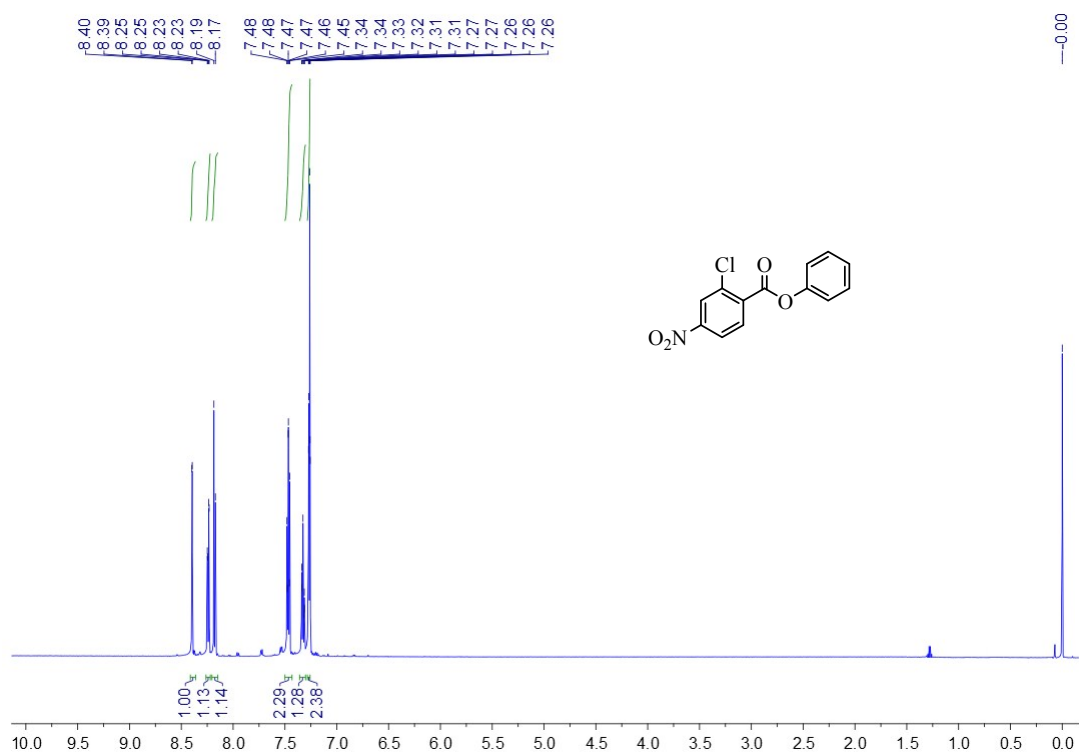

$^{13}\text{C}$  NMR of phenyl 2-chloro-4-nitrobenzoate **3pa**

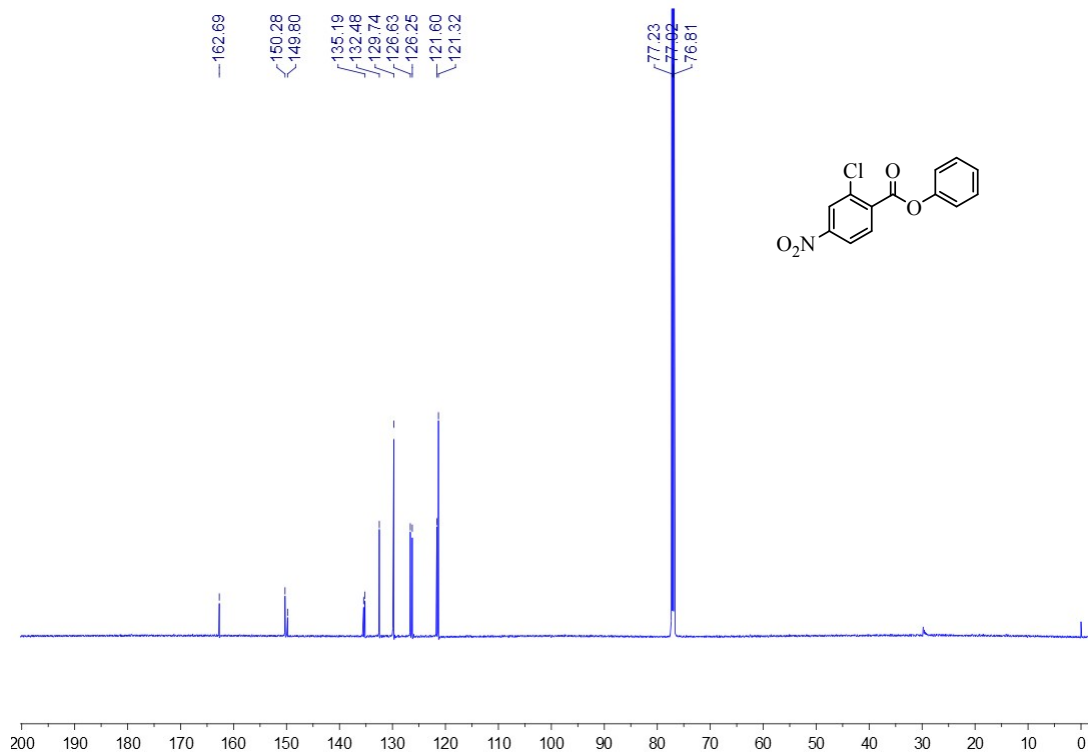

$^1\text{H}$  NMR of phenyl 1-naphthoate **3qa**

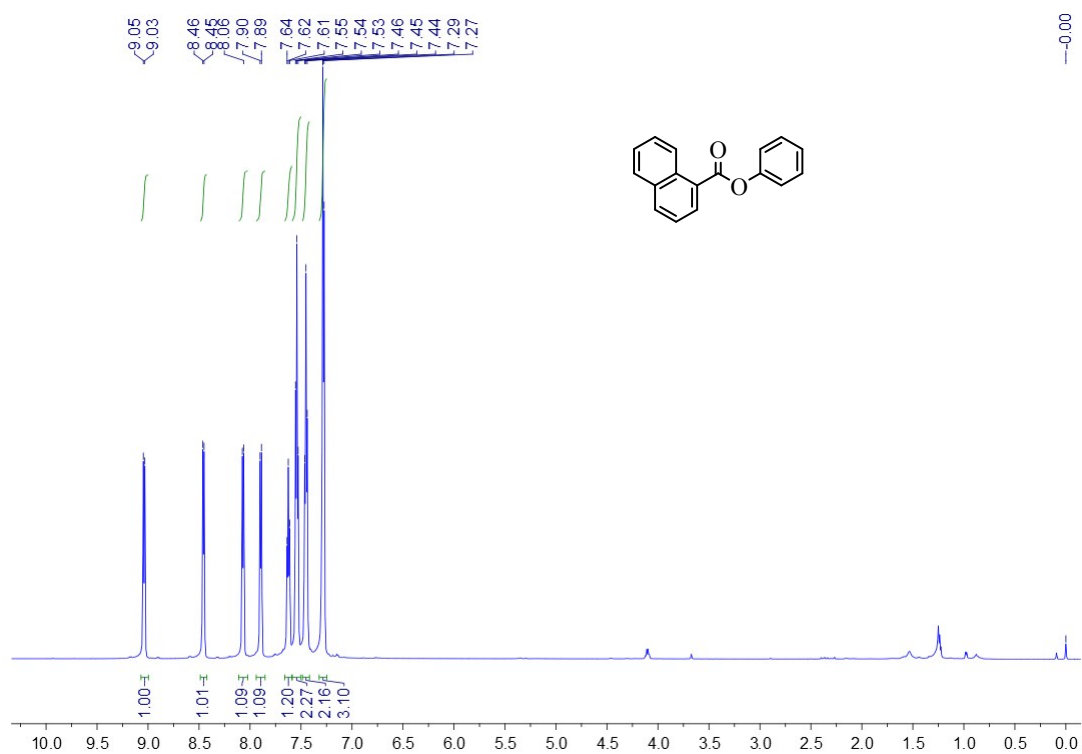

$^{13}\text{C}$  NMR of phenyl 1-naphthoate **3qa**

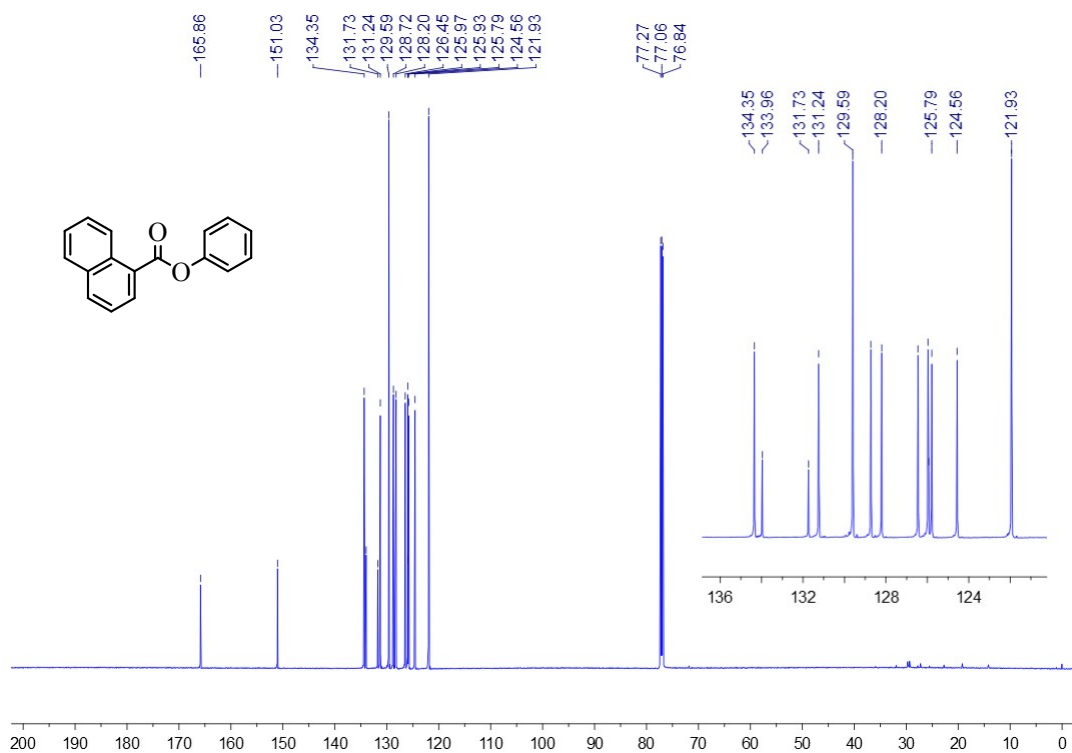

$^1\text{H}$  NMR of phenyl thiophene-2-carboxylate **3ra**



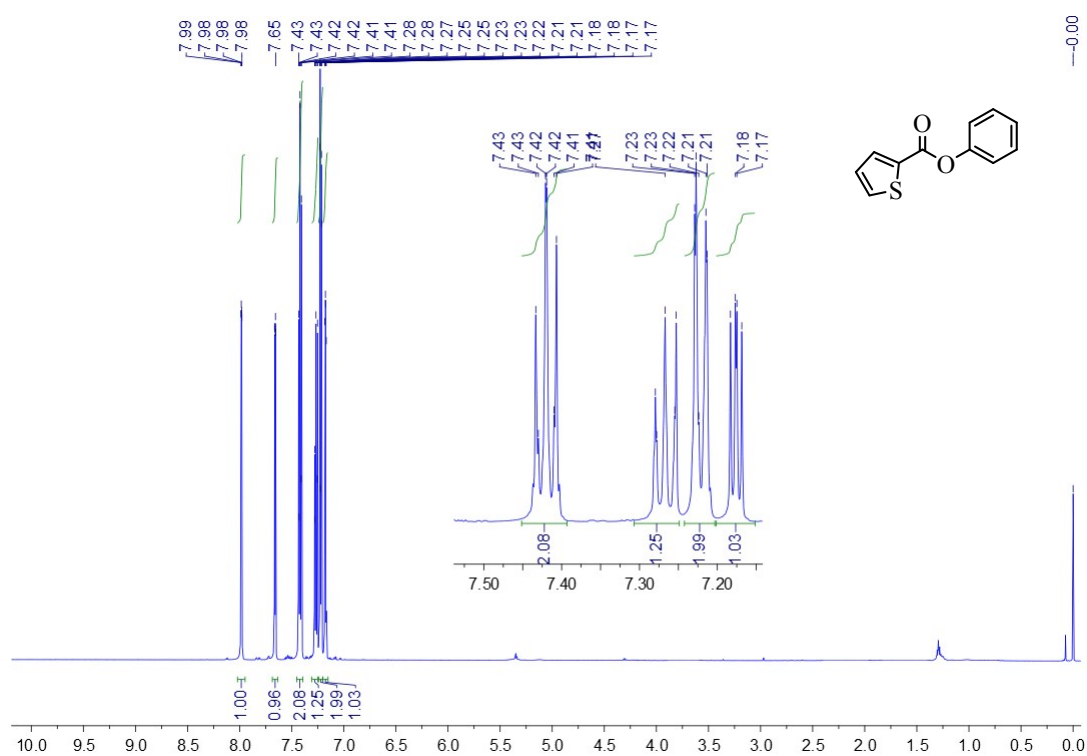

<sup>13</sup>C NMR of phenyl thiophene-2-carboxylate **3a**

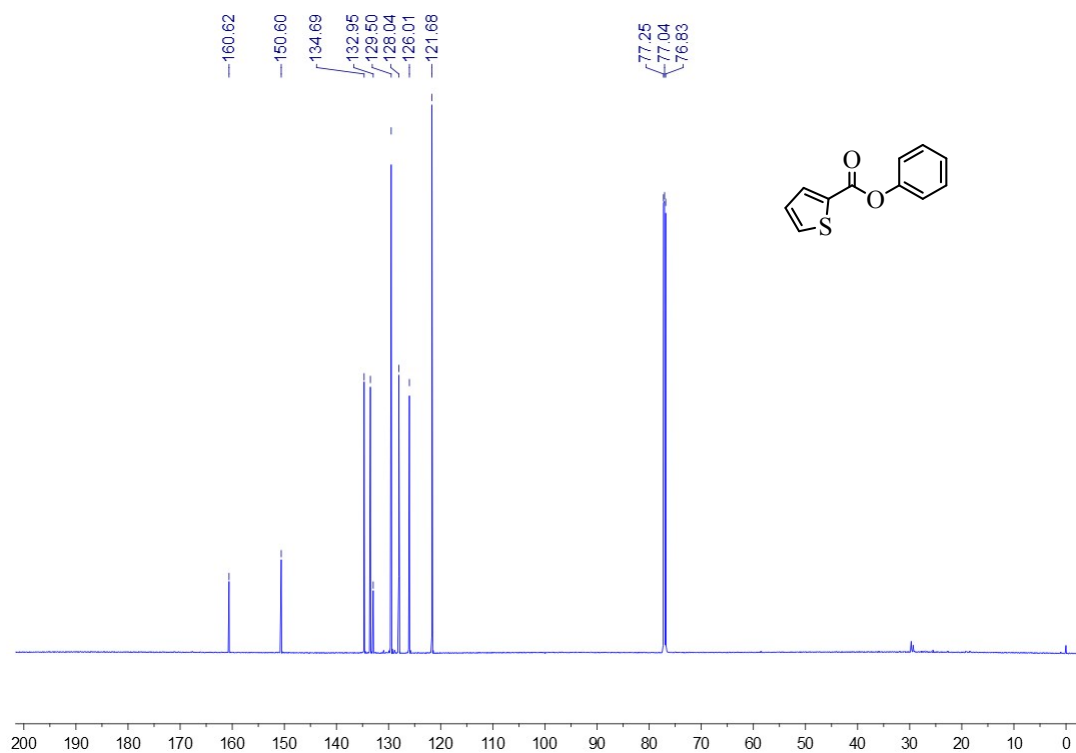

<sup>1</sup>H NMR of phenyl *1H*-indole-2-carboxylate **3sa**

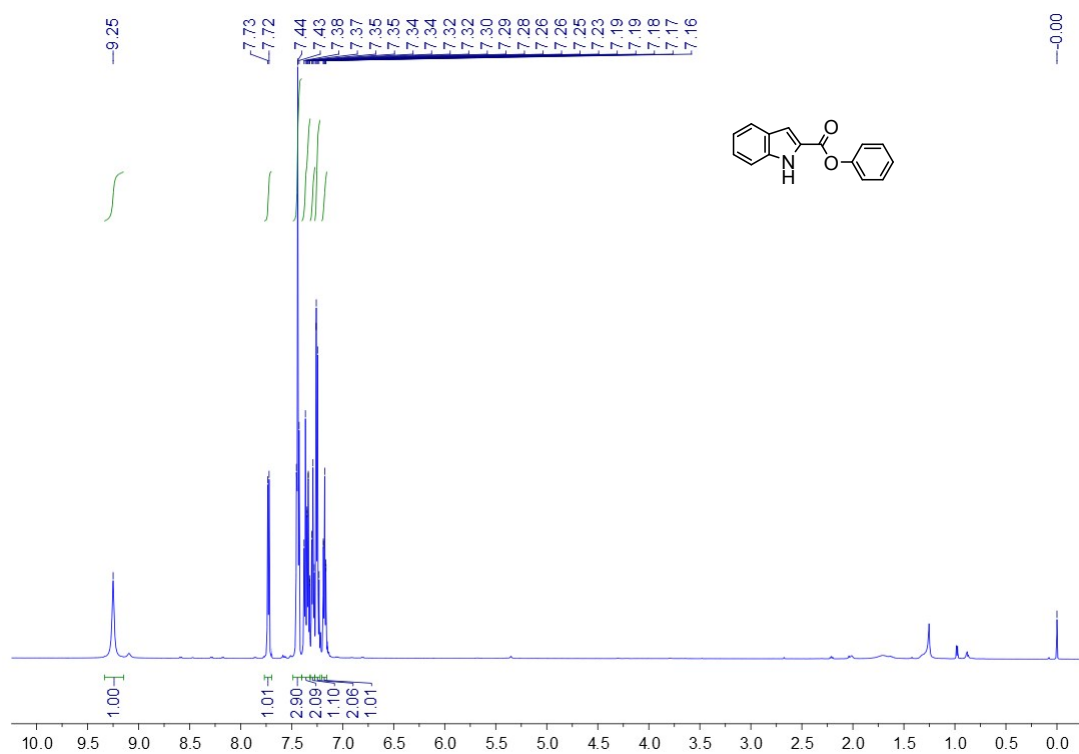

<sup>13</sup>C NMR of phenyl 1H-indole-2-carboxylate **3sa**

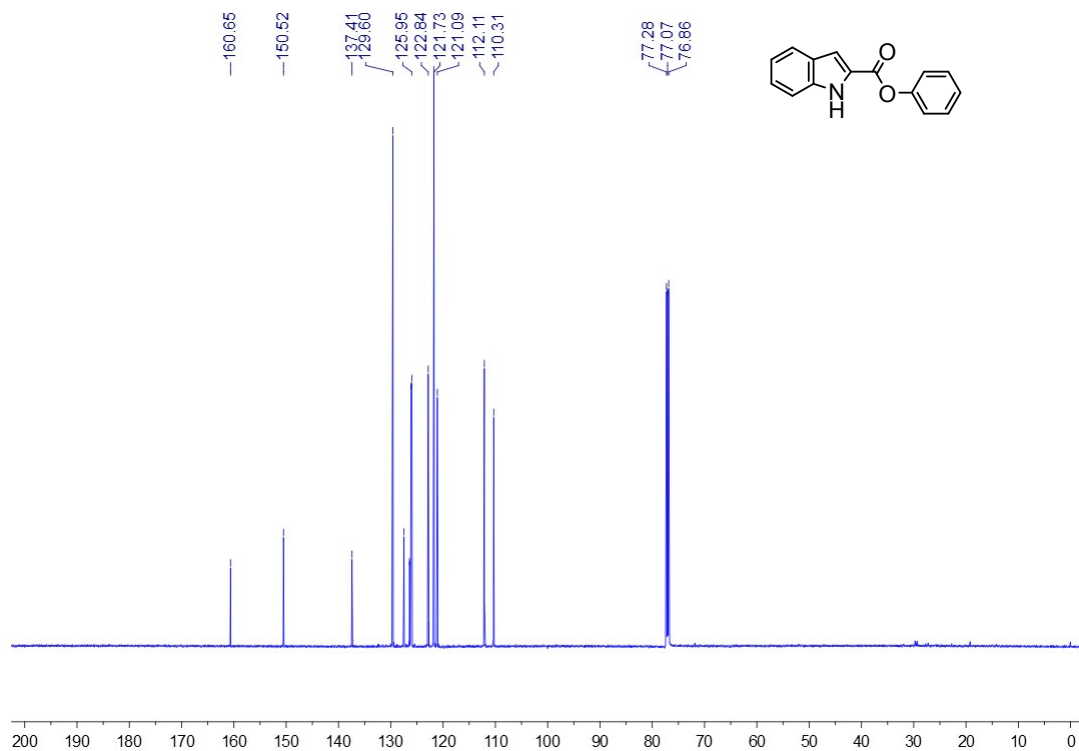

<sup>1</sup>H NMR of phenyl cinnamate **3ta**

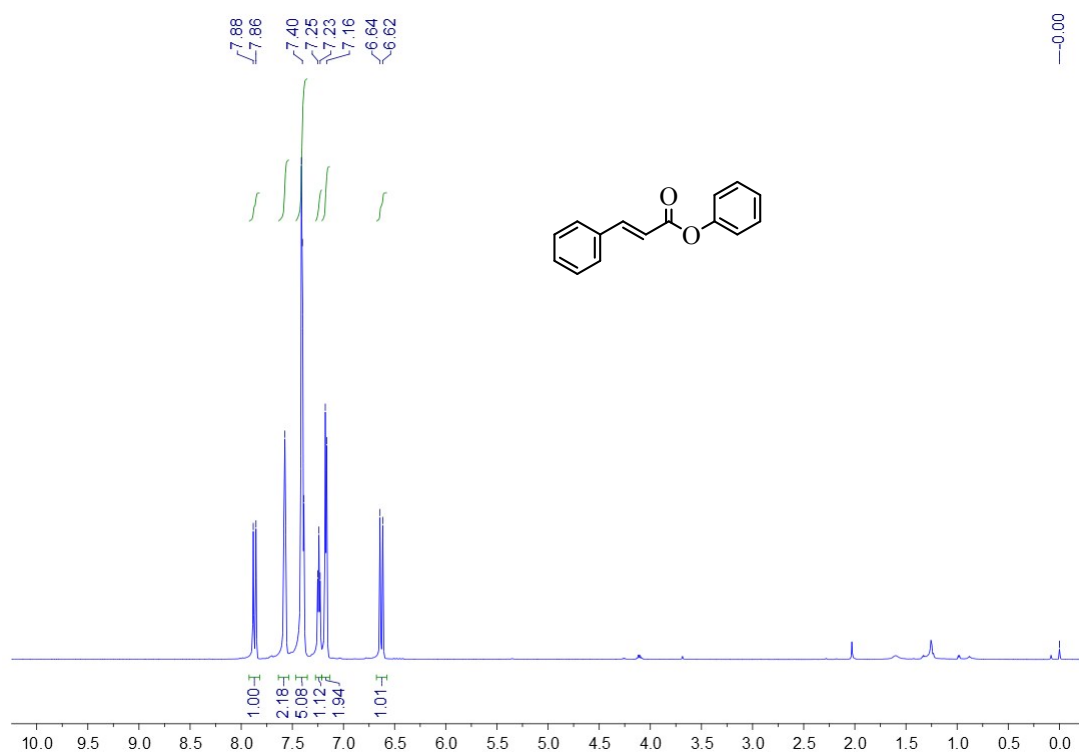

**<sup>13</sup>C NMR of phenyl cinnamate **3ta****

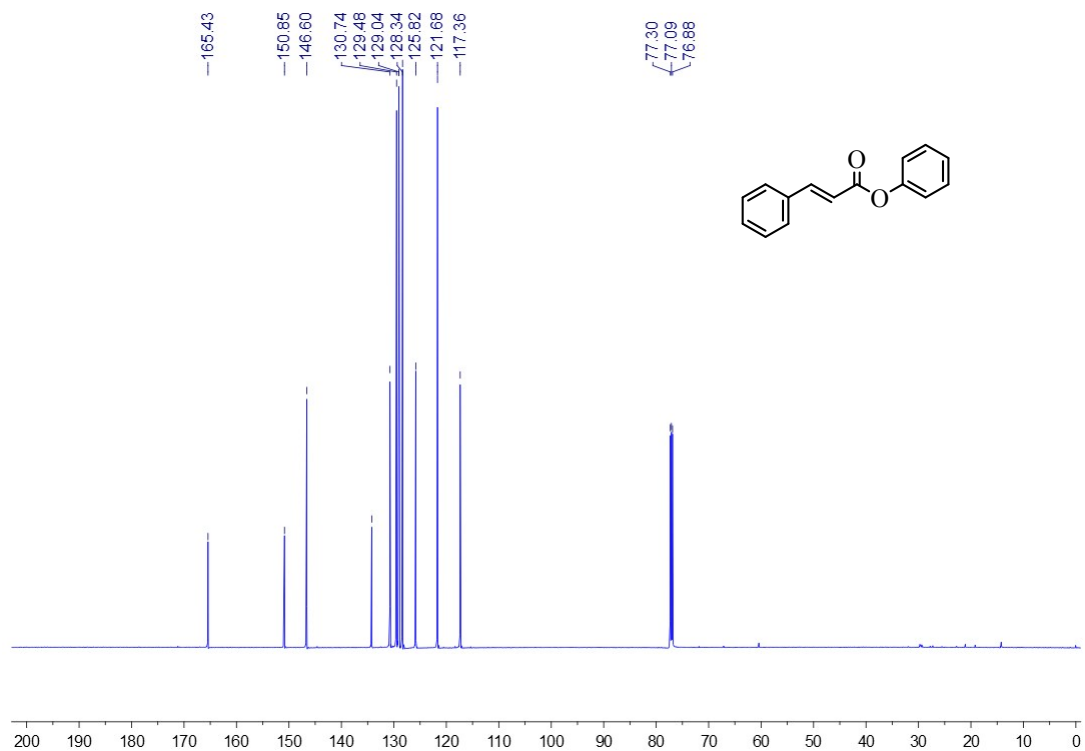

**<sup>1</sup>H NMR of 4-methylphenyl 2-methylbenzoate **3ab****

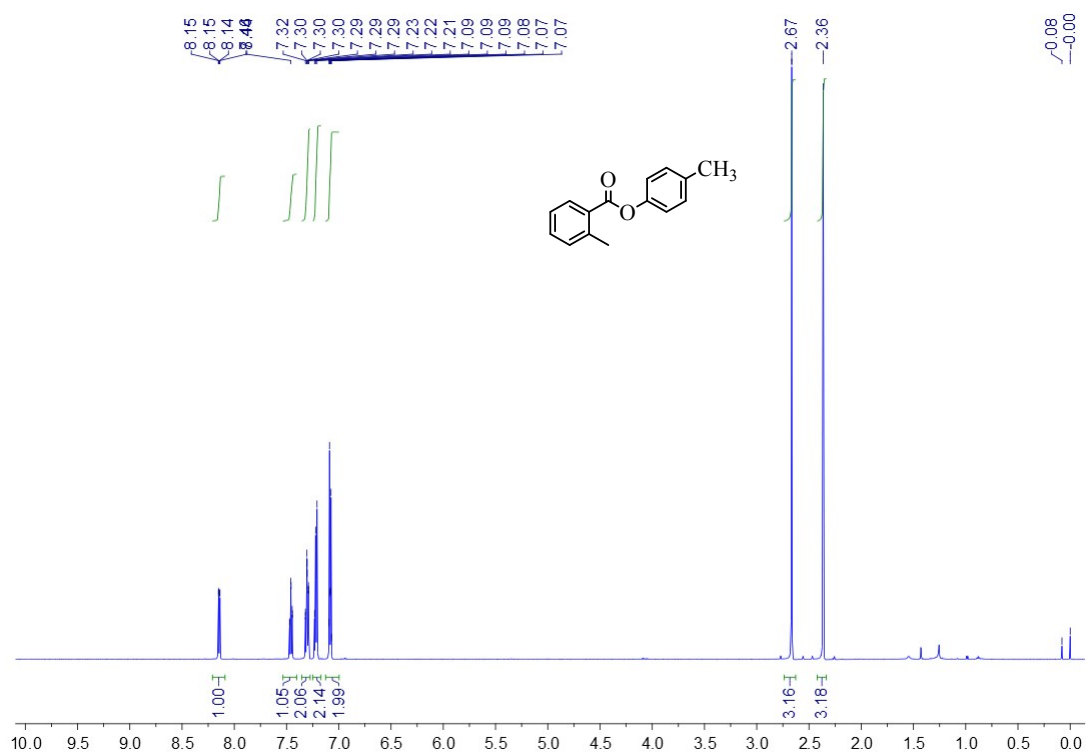

<sup>13</sup>C NMR of 4-methylphenyl 2-methylbenzoate **3ab**

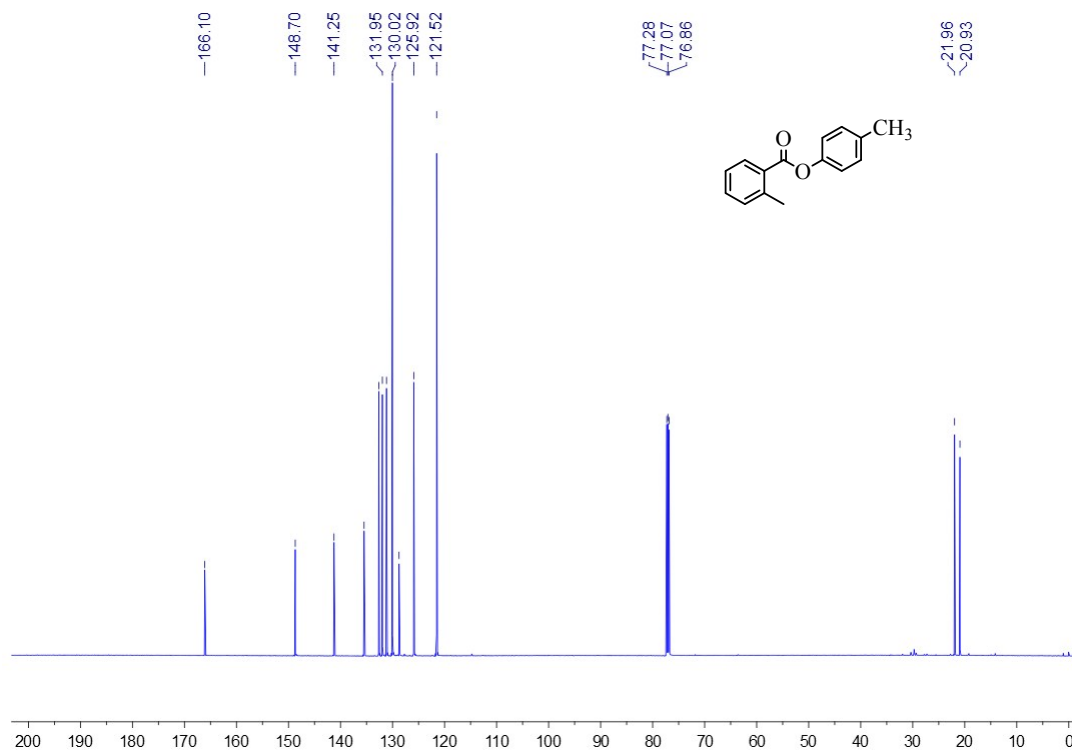

<sup>1</sup>H NMR of 4-chlorophenyl 2-methylbenzoate **3ac**

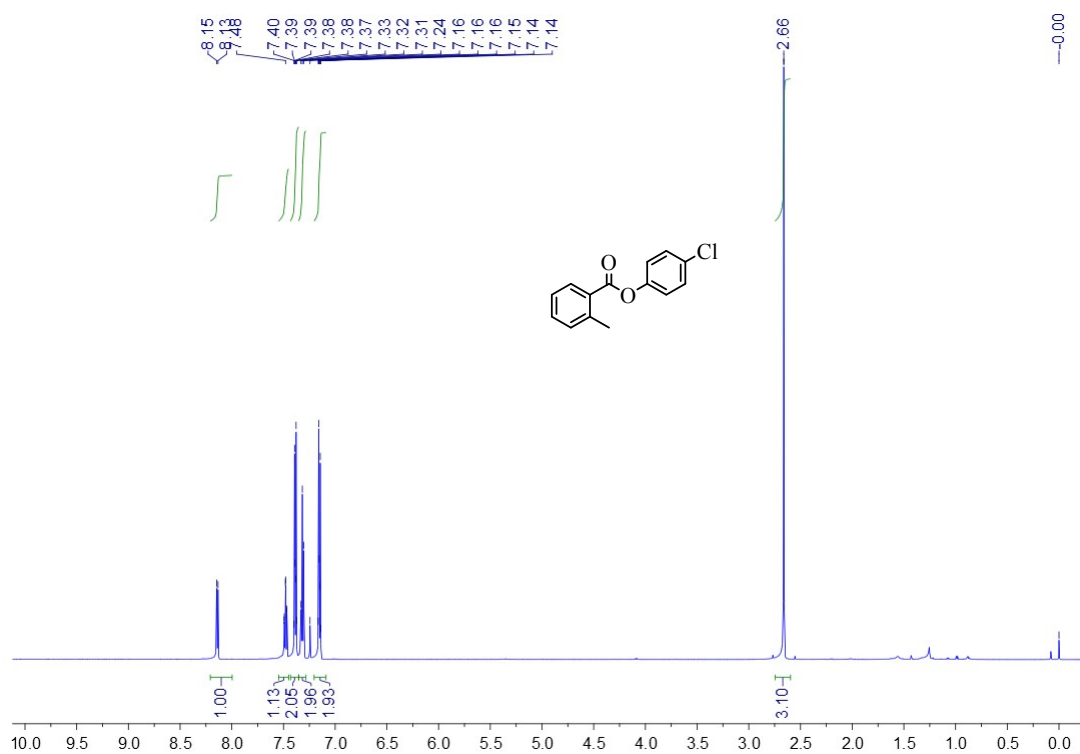

$^{13}\text{C}$  NMR of 4-chlorophenyl 2-methylbenzoate **3ac**

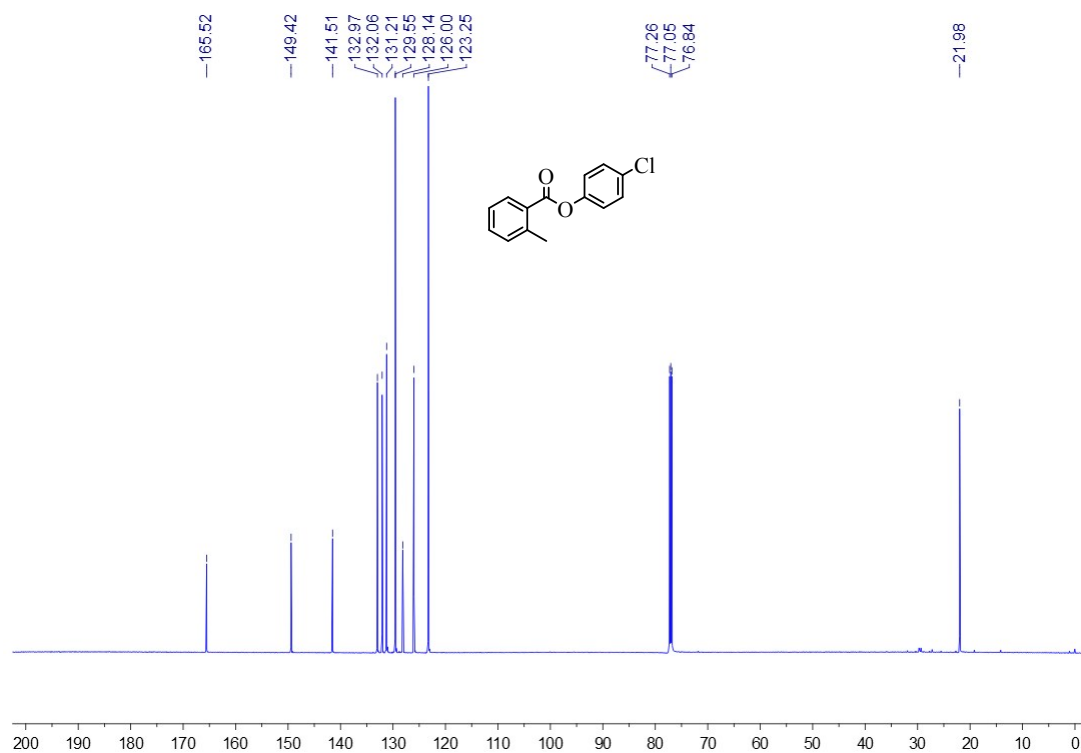

$^1\text{H}$  NMR of 4-iodophenyl 2-methylbenzoate **3ad**

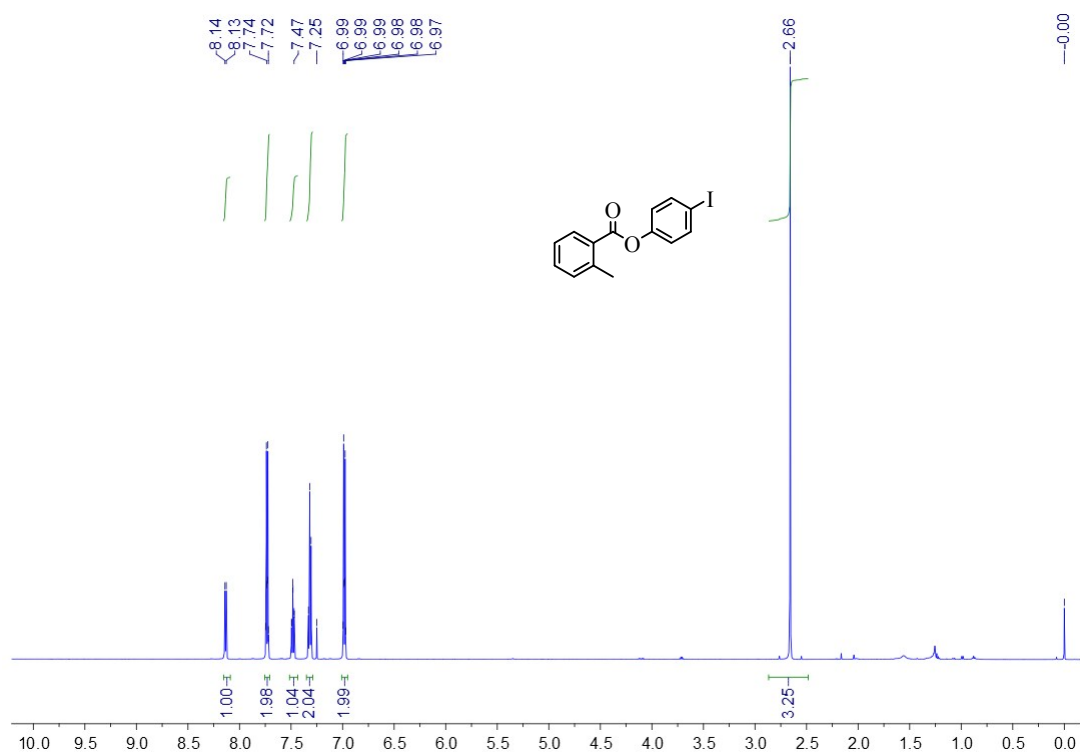

$^{13}\text{C}$  NMR of 4-iodophenyl 2-methylbenzoate **3ad**

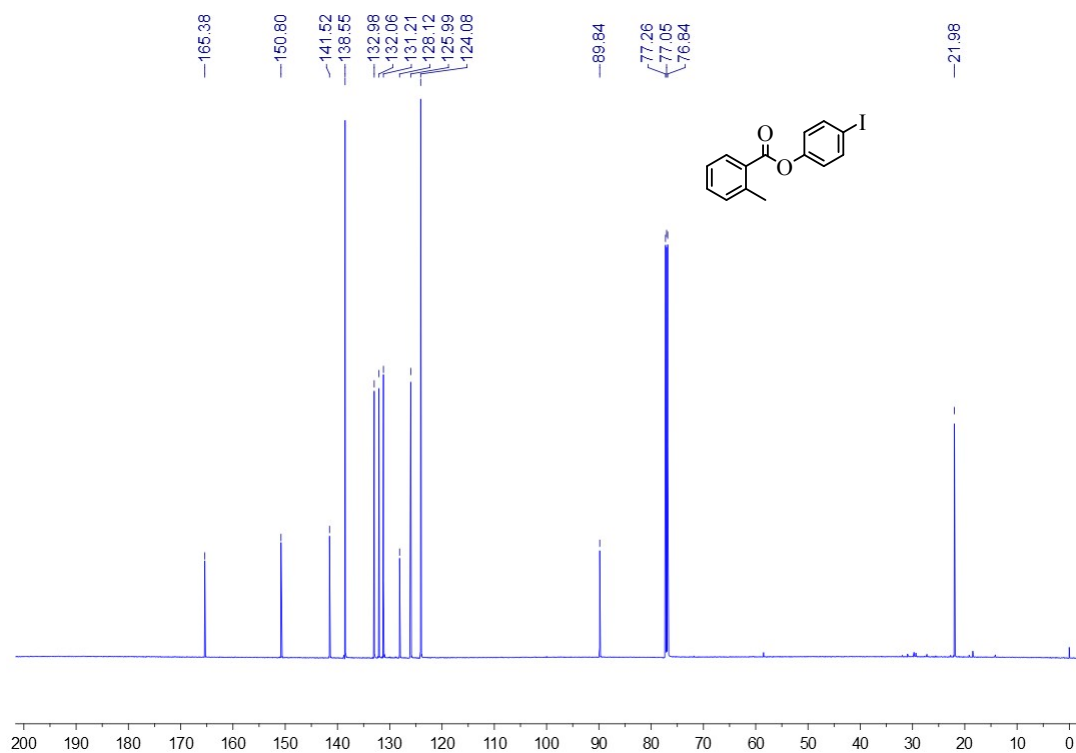

$^1\text{H}$  NMR of 4-acetylphenyl 2-methylbenzoate **3ae**

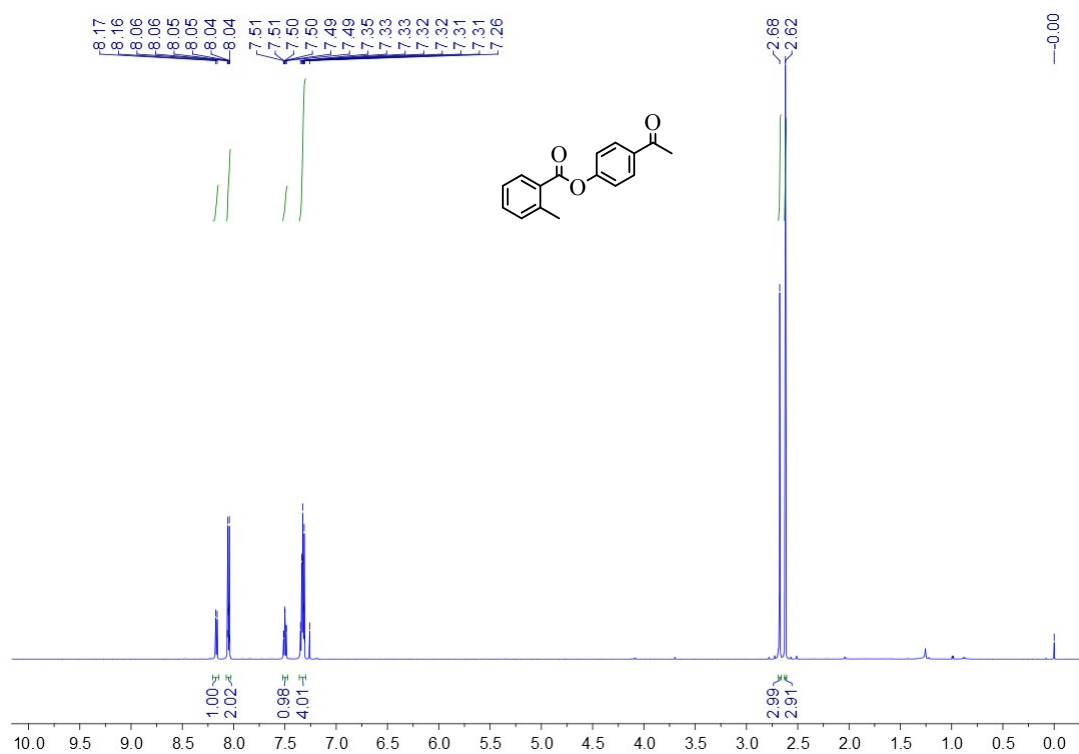

<sup>13</sup>C NMR of 4-acetylphenyl 2-methylbenzoate **3ae**

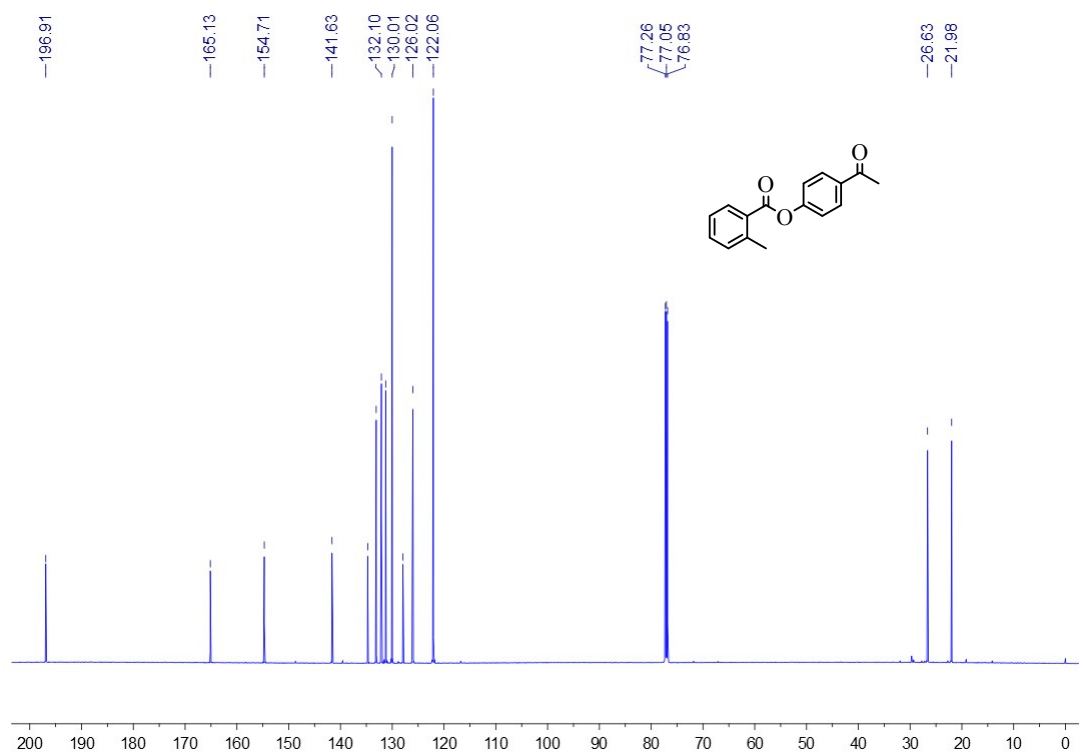

<sup>1</sup>H NMR of 4-nitrophenyl 2-methylbenzoate **3af**

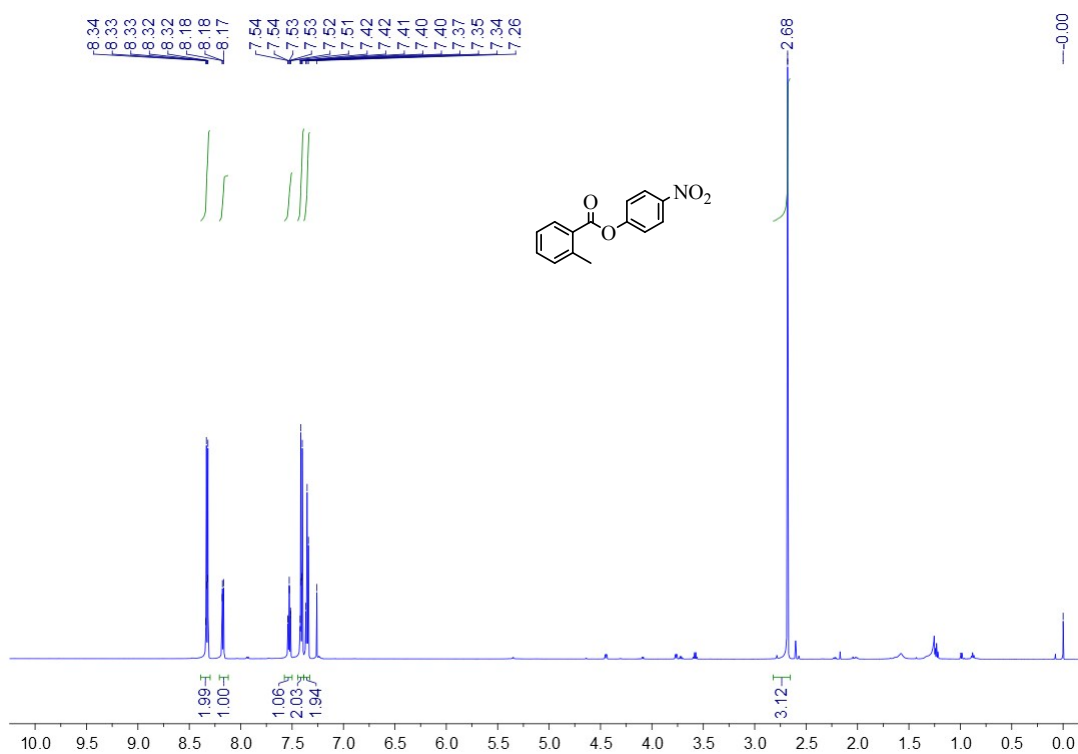

<sup>13</sup>C NMR of 4-nitrophenyl 2-methylbenzoate **3af**

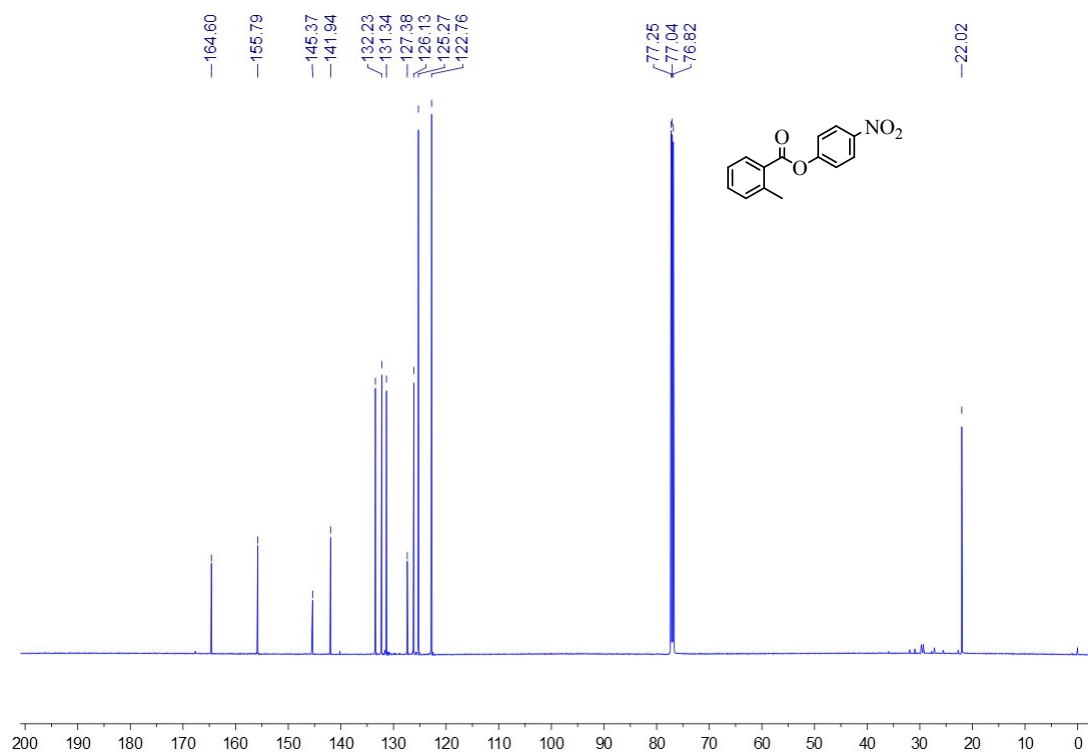

<sup>1</sup>H NMR of 4-methoxyphenyl 2-methylbenzoate **3ag**



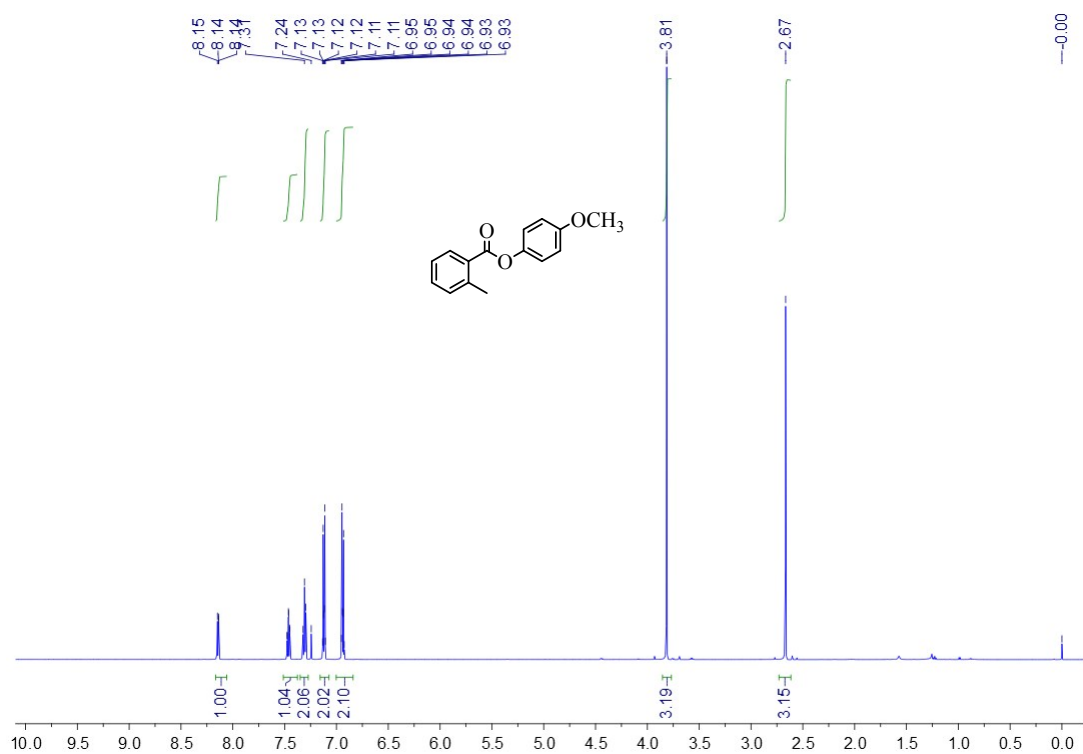

<sup>13</sup>C NMR of 4-methoxyphenyl 2-methylbenzoate **3ag**

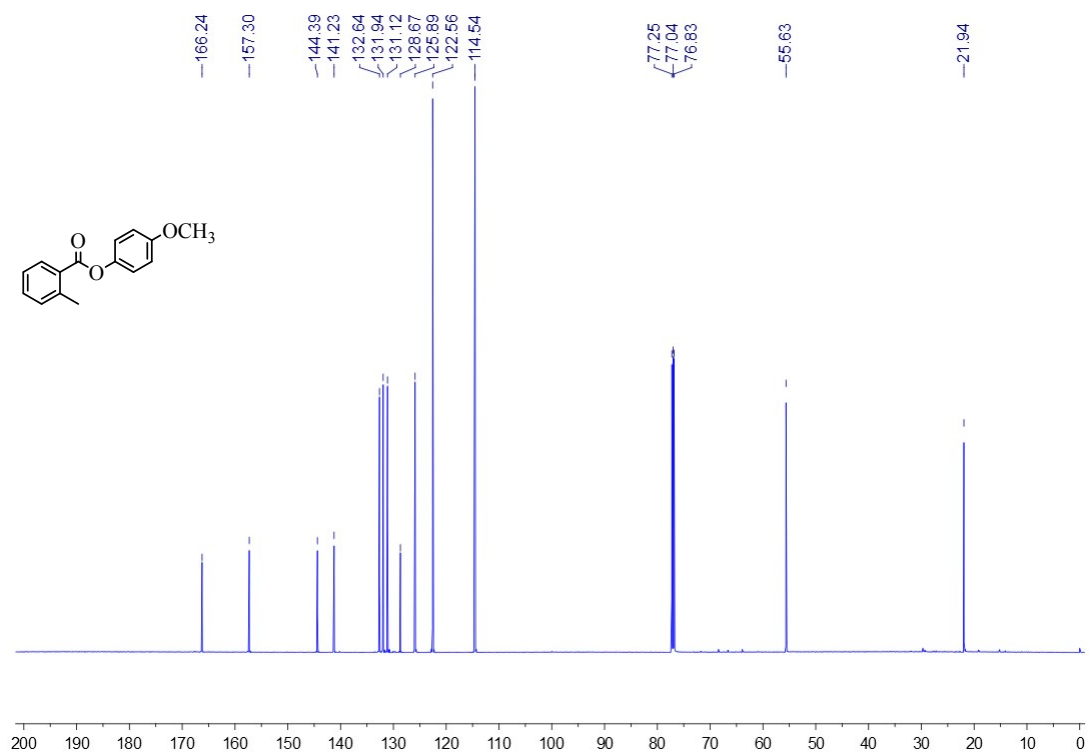

<sup>1</sup>H NMR of 4-formylphenyl 2-methylbenzoate **3ah**

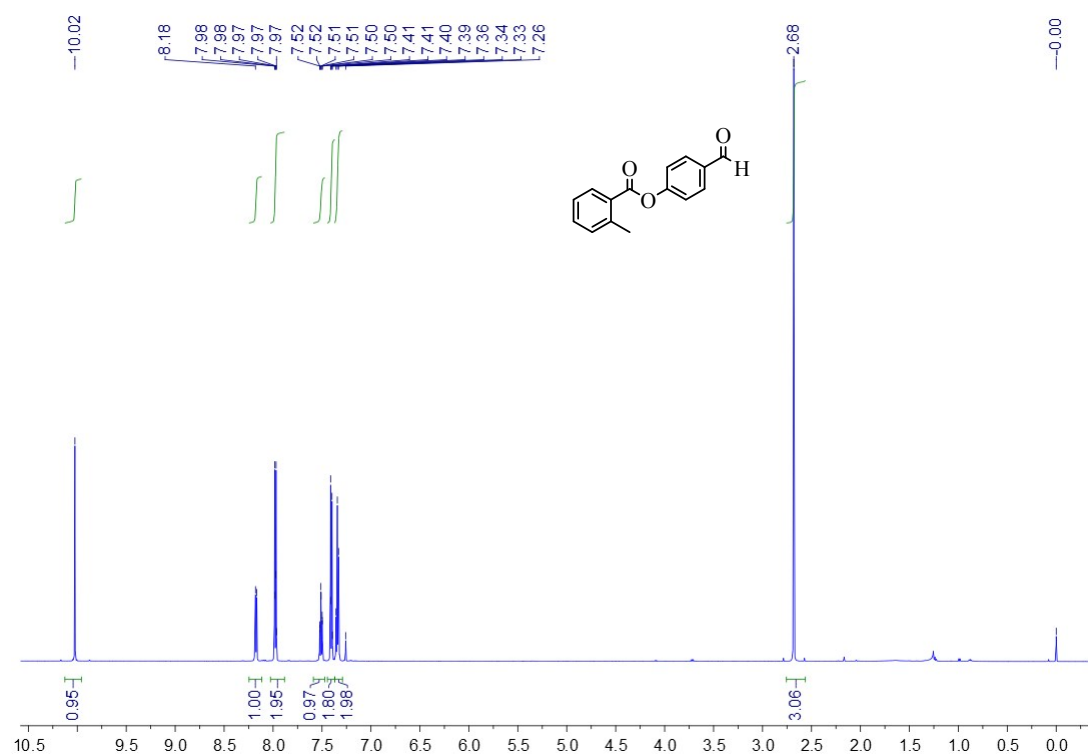

<sup>13</sup>C NMR of 4-formylphenyl 2-methylbenzoate **3ah**

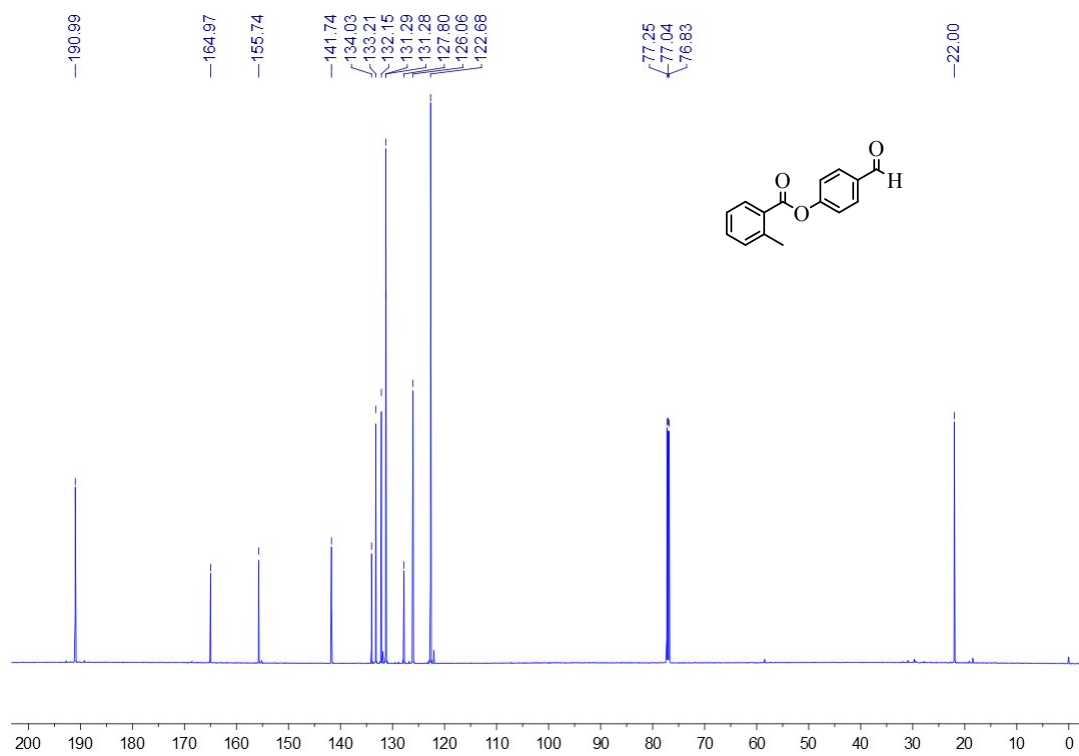

<sup>1</sup>H NMR of 3-methoxyphenyl 2-methylbenzoate **3ai**

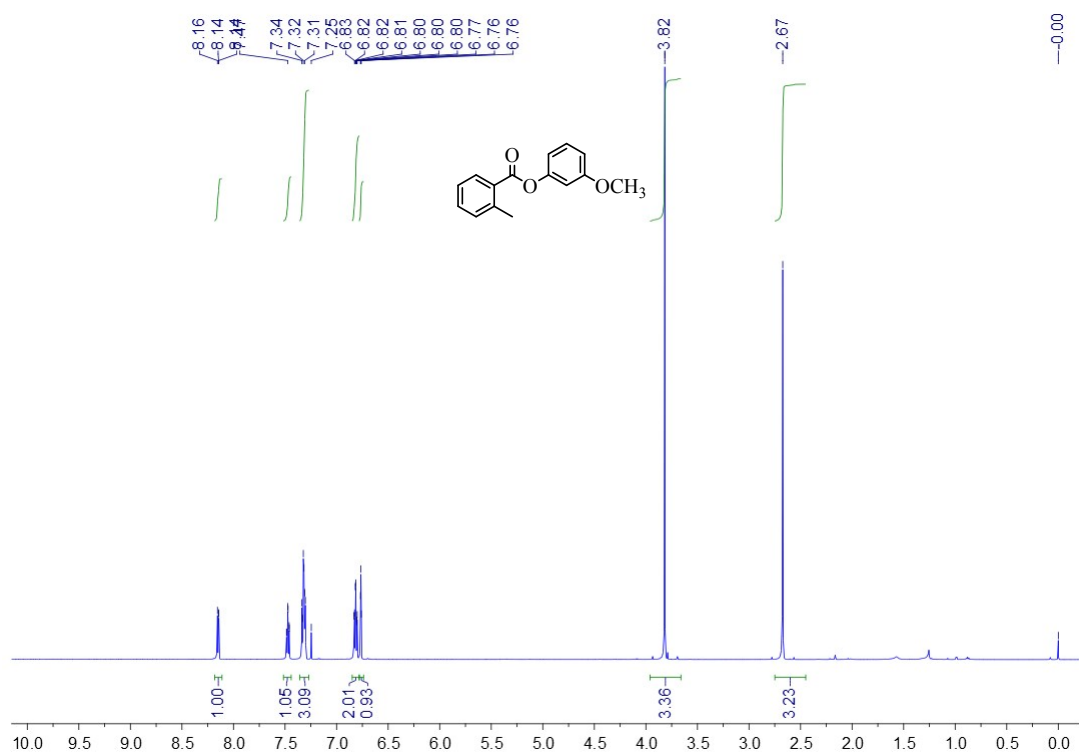

**<sup>13</sup>C NMR of 3-methoxyphenyl 2-methylbenzoate **3ai****

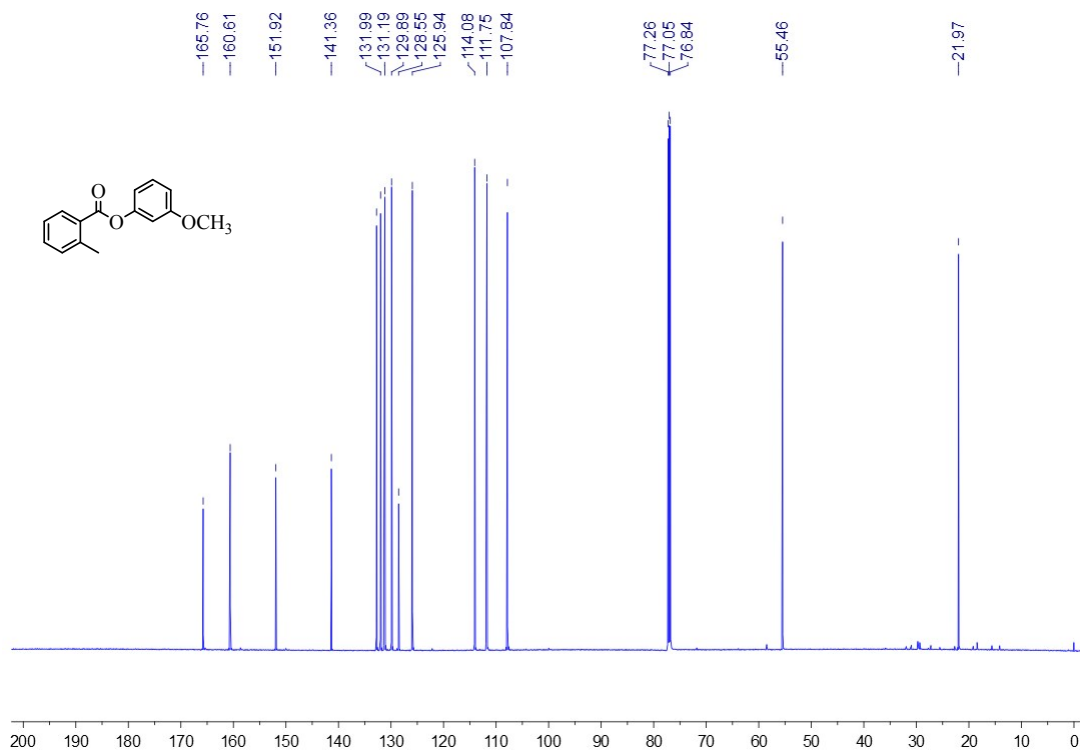

**<sup>1</sup>H NMR of 2,6-dimethoxyphenyl 2-methylbenzoate **3aj****

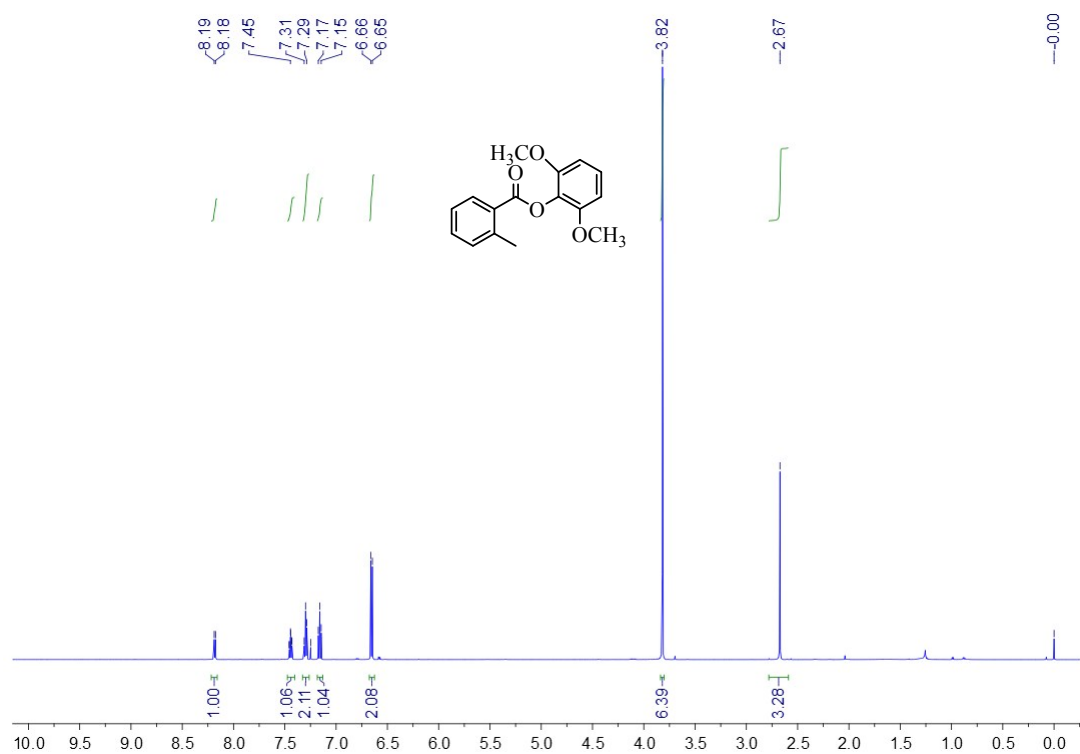

$^{13}\text{C}$  NMR of 2,6-dimethoxyphenyl 2-methylbenzoate **3aj**

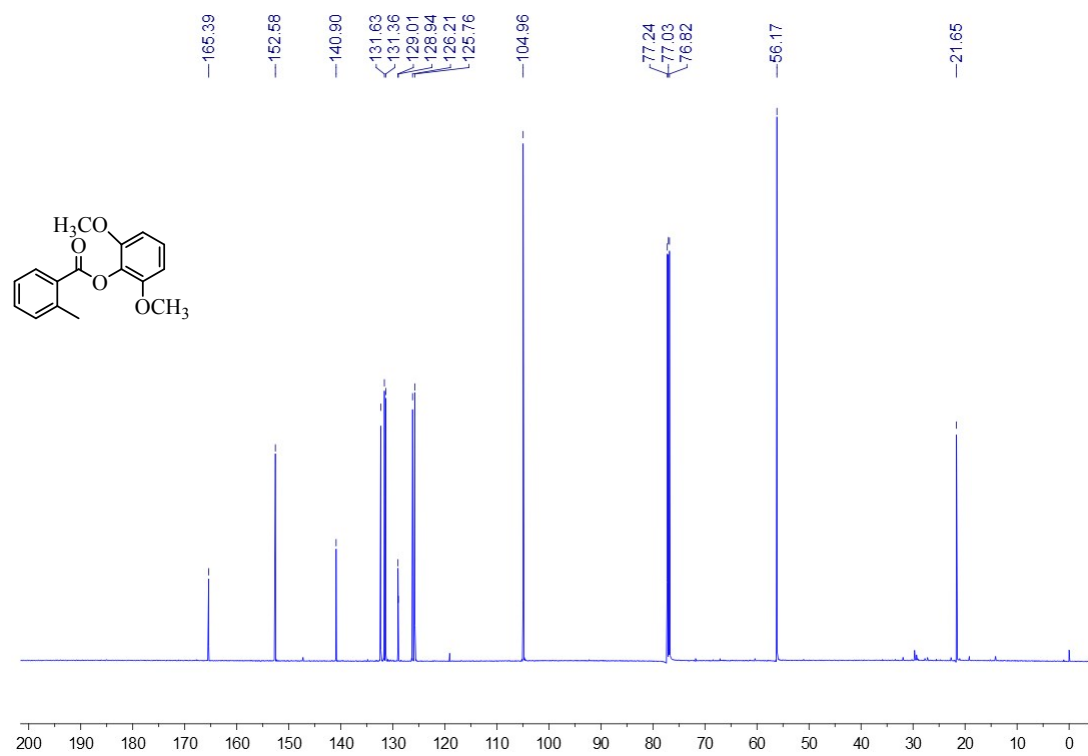

### MS(EI) of 2,6-dimethoxyphenyl 2-methylbenzoate **3aj**

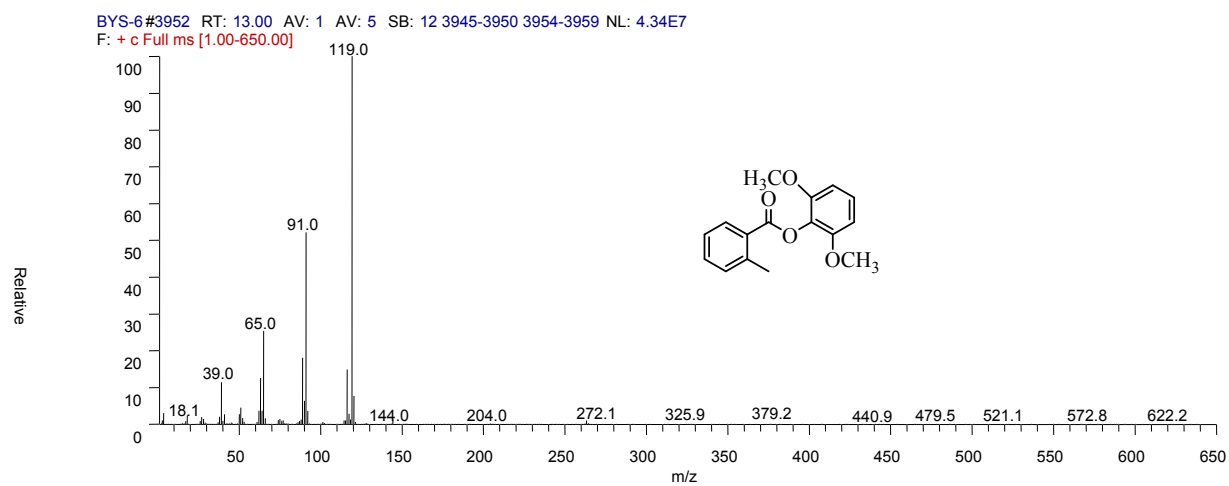

### <sup>1</sup>H NMR of 2,3-dichlorophenyl 2-methylbenzoate **3ak**

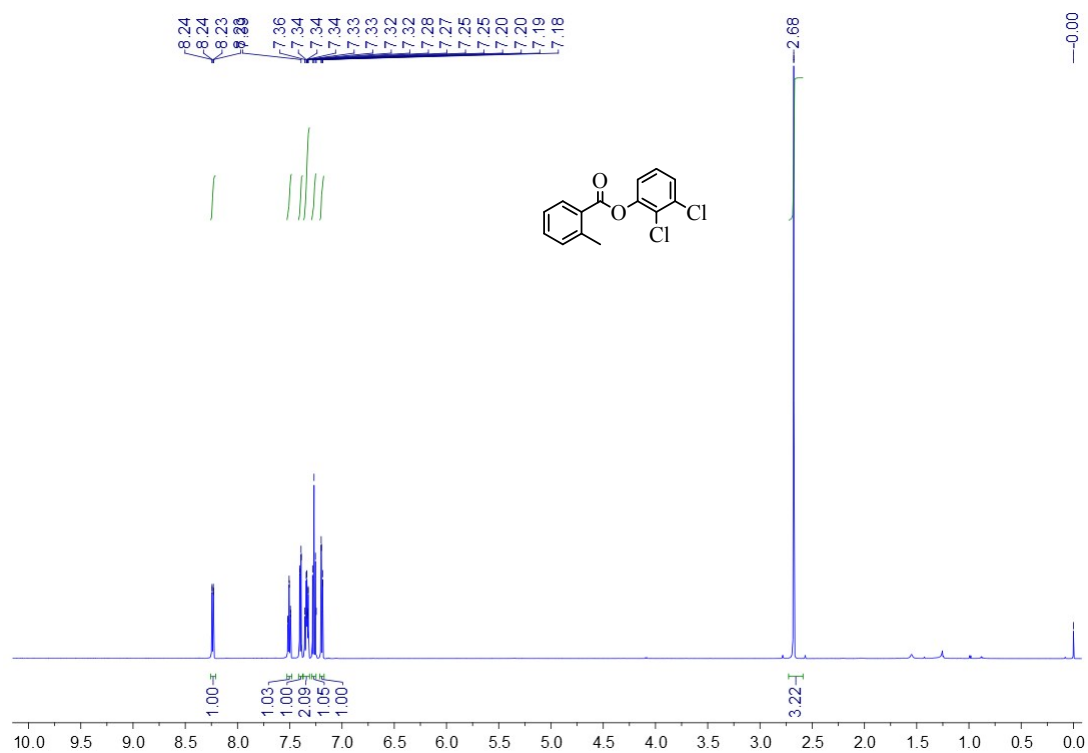

### <sup>13</sup>C NMR of 2,3-dichlorophenyl 2-methylbenzoate **3ak**

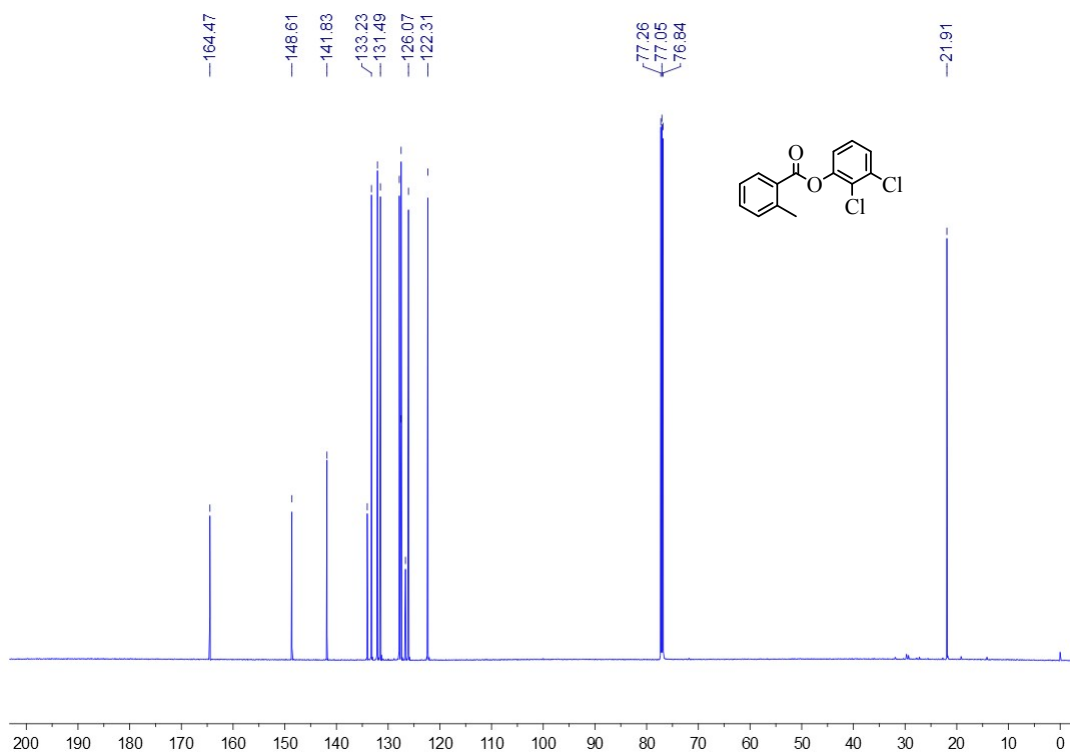

MS(EI) of 2,3-dichlorophenyl 2-methylbenzoate **3ak**

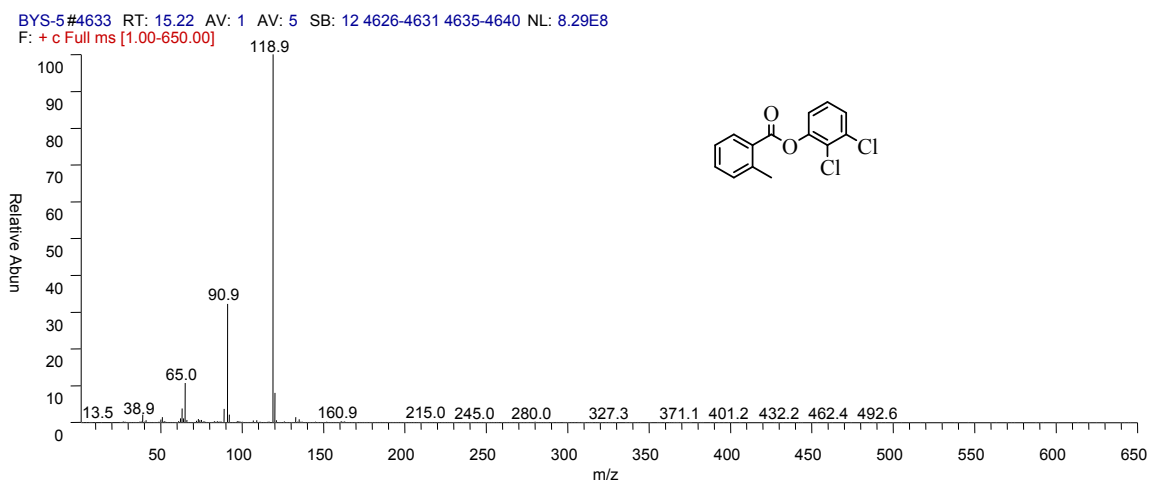

<sup>1</sup>H NMR of naphthalen-1-yl 2-methylbenzoate **3al**

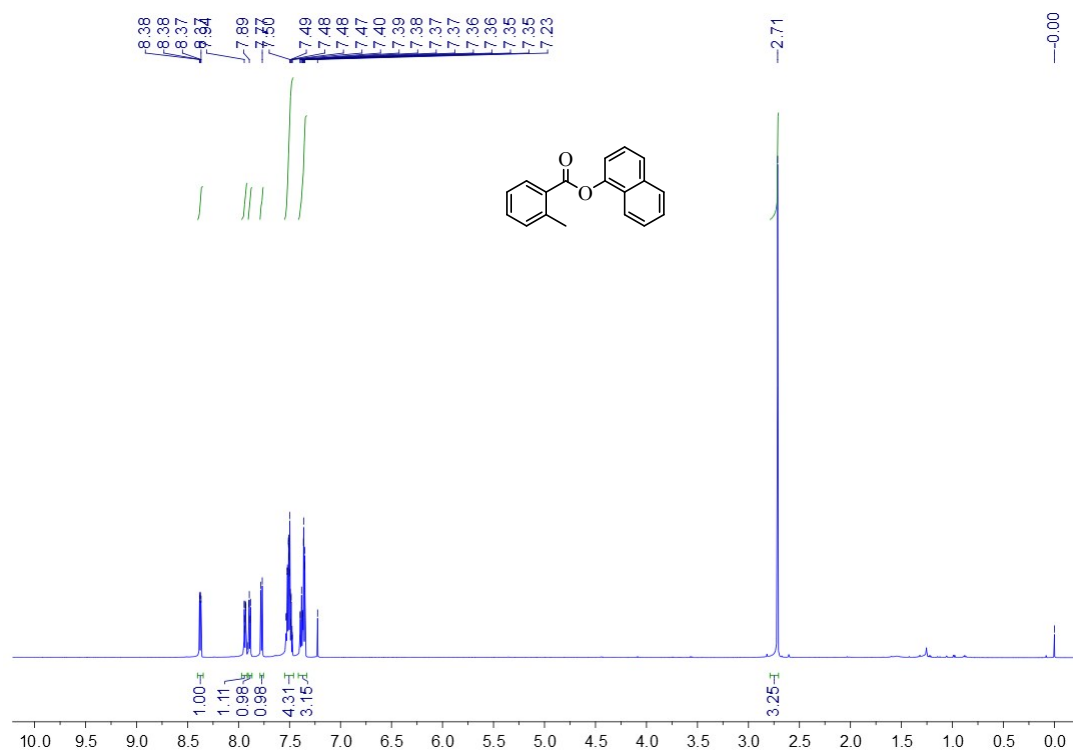

<sup>13</sup>C NMR of naphthalen-1-yl 2-methylbenzoate **3al**

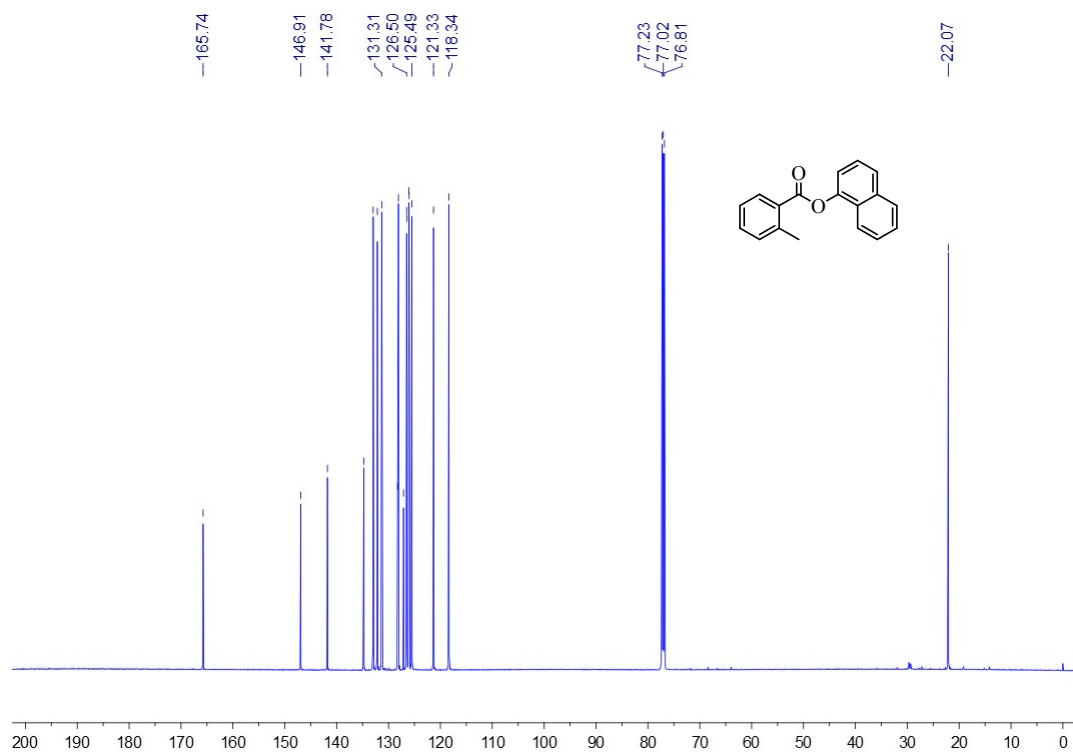

<sup>1</sup>H NMR of naphthalen-2-yl 2-methylbenzoate **3am**

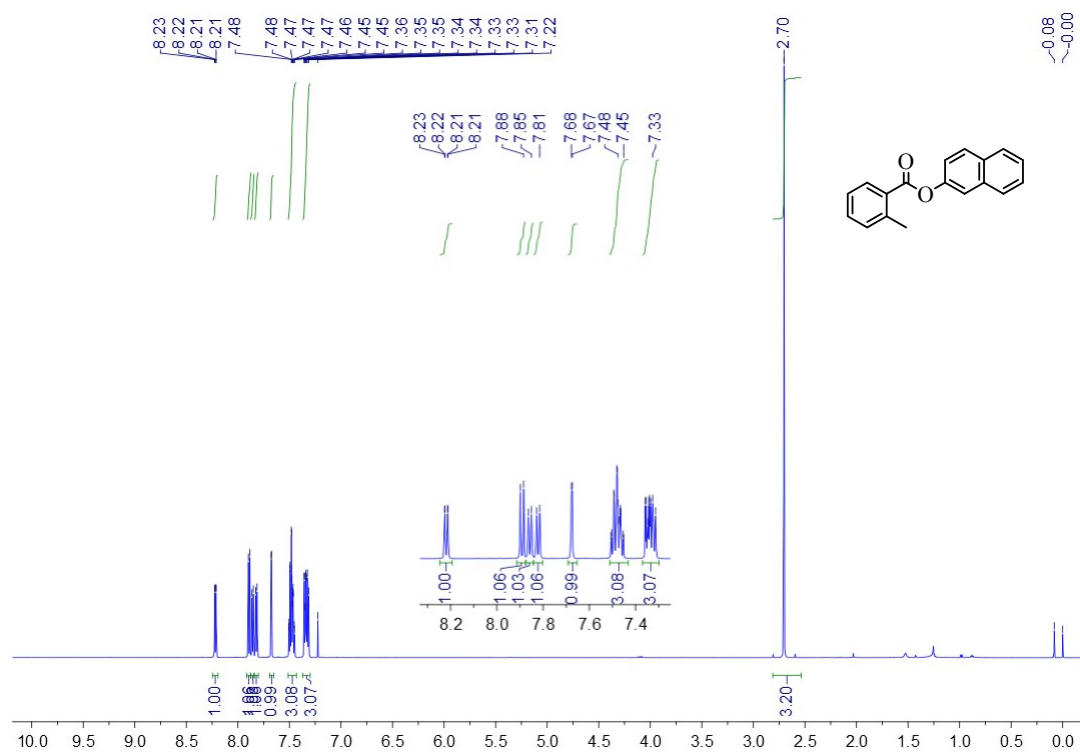

<sup>13</sup>C NMR of naphthalen-2-yl 2-methylbenzoate **3am**

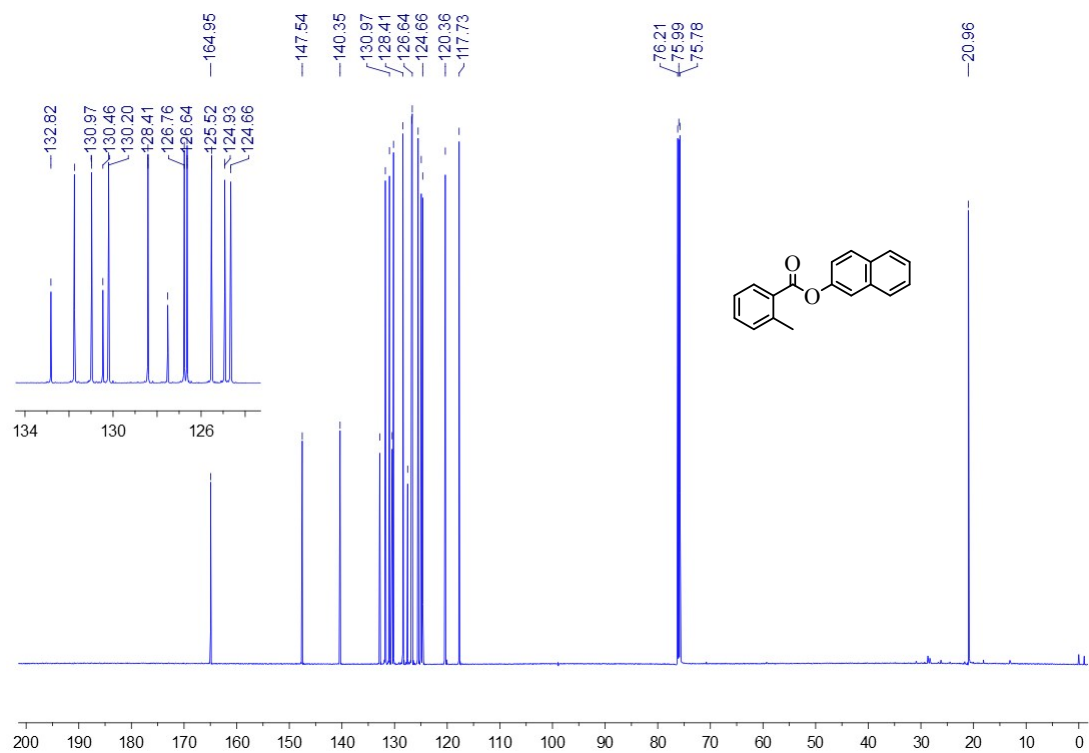



<sup>1</sup>H NMR of quinolin-6-yl 2-methylbenzoate **3an**

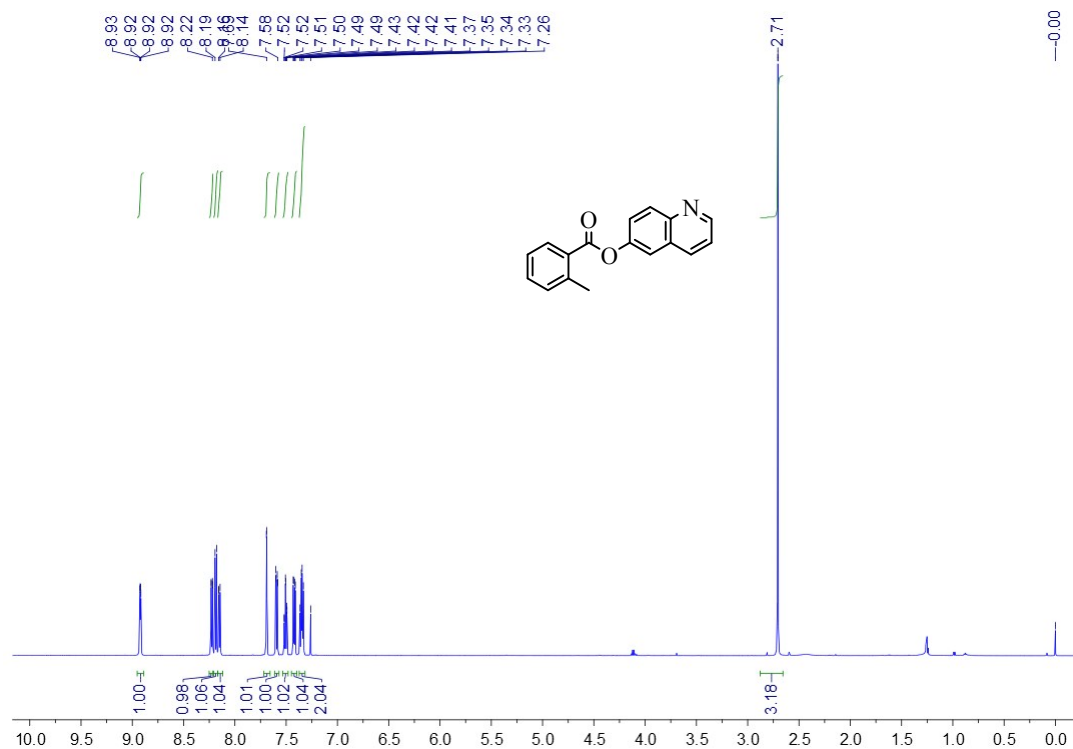

<sup>13</sup>C NMR of quinolin-6-yl 2-methylbenzoate **3an**

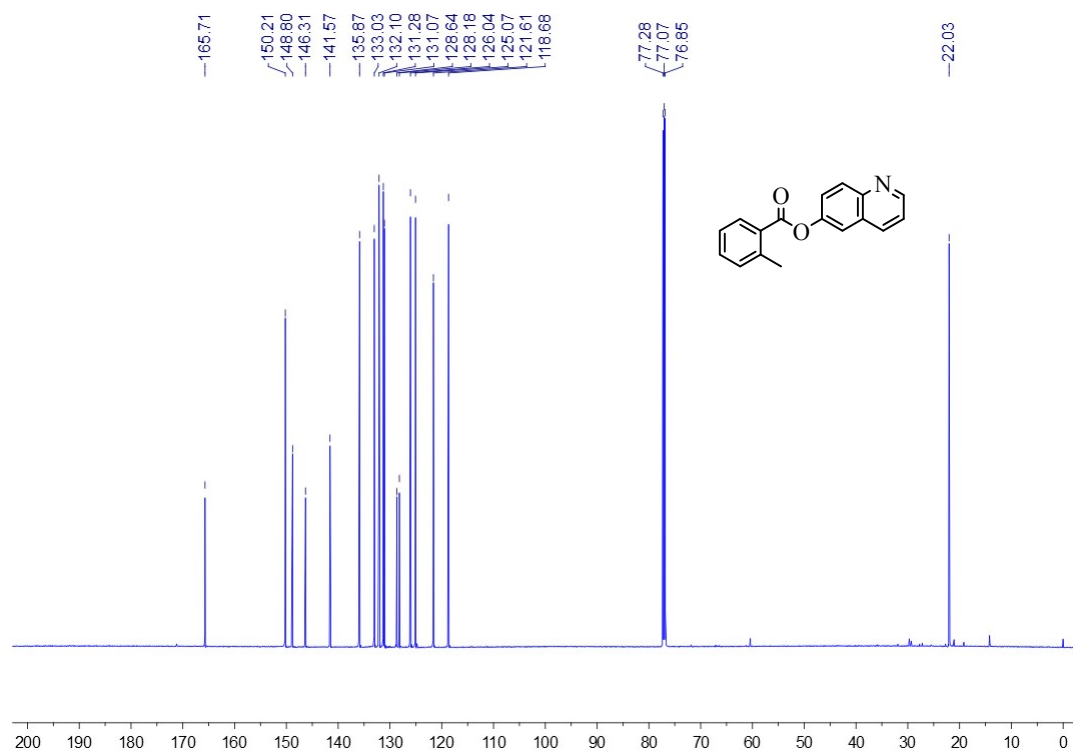

MS(EI) of quinolin-6-yl 2-methylbenzoate **3an**

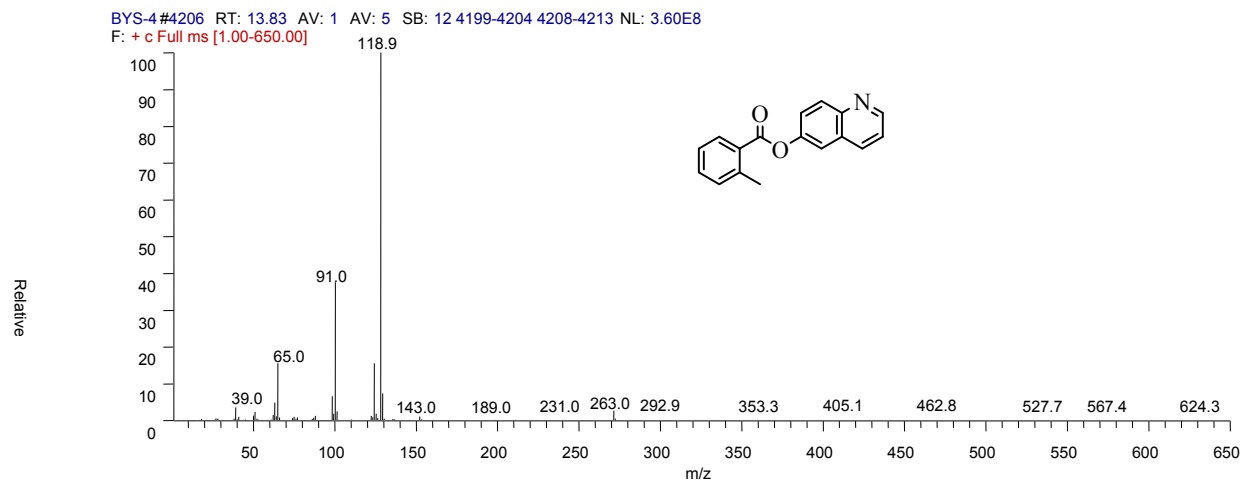

Supplement: c8ra04984j1.pdf [file c8ra04984j1.pdf]
